# Supplementary material for: Antimicrobials from a feline commensal bacterium inhibit skin infection by drug-resistant S. pseudintermedius
Source: eLife. 2021 Oct 19;10:e66793. doi: 10.7554/eLife.66793 (PMC8592530; doi:10.7554/eLife.66793)
Supplement: Figure 1—figure supplement 2—source data 1. [file elife-66793-fig1-figsupp2-data1.xlsx]

## Sheet: Fig.1-fig.suppl.2A
	sn	sn	sn	tsb	tsb	tsb
A	0.0354	0.0342	0.0366	0.0321	0.0347	0.0328
0h	2.031	2.129	2.0716	1.7763	1.7181	1.8386
2h	1.2573	1.2268	1.2257	1.5762	1.4981	1.5592
4h	1.2986	1.1685	1.2276	1.4711	1.4568	1.4518
6h	1.07	1.0572	1.0972	1.4329	1.4313	1.4683
8h	0.8564	0.8597	0.8571	1.5676	1.5308	1.5774
24h	1.138	1.1048	1.0044	1.2224	1.1655	1.1743
H	0.0358	0.043	0.0421	0.0398	0.0425	0.0381
	sn	sn	sn	tsb	tsb	tsb
A	0.0034	0.0022	0.0046	0.0001	0.0027	0.0008
0h	1.999	2.097	2.0396	1.7443	1.6861	1.8066
2h	1.2253	1.1948	1.1937	1.5442	1.4661	1.5272
4h	1.2666	1.1365	1.1956	1.4391	1.4248	1.4198
6h	1.038	1.0252	1.0652	1.4009	1.3993	1.4363
8h	0.8244	0.8277	0.8251	1.5356	1.4988	1.5454
24h	1.106	1.0728	0.9724	1.1904	1.1335	1.1423
H	0.0038	0.011	0.0101	0.0078	0.0105	0.0061
	sn	sn	sn	tsb	tsb	tsb	AVE SN	AVE TSB
0h	1.967	2.065	2.0076	1.7123	1.6541	1.7746	2.0132	1.71367
2h	1.1933	1.1628	1.1617	1.5122	1.4341	1.4952
4h	1.2346	1.1045	1.1636	1.4071	1.3928	1.3878
6h	1.006	0.9932	1.0332	1.3689	1.3673	1.4043
8h	0.7924	0.7957	0.7931	1.5036	1.4668	1.5134
24h	1.074	1.0408	0.9404	1.1584	1.1015	1.1103
	sn	sn	sn	tsb	tsb	tsb
0h	0.977051	1.02573	0.997218	0.999202	0.96524	1.03556
2h	0.592738	0.577588	0.577042	0.882435	0.836861	0.872515
4h	0.613253	0.548629	0.577985	0.821105	0.81276	0.809842
6h	0.499702	0.493344	0.513213	0.798813	0.79788	0.819471
8h	0.393602	0.395241	0.39395	0.877417	0.855942	0.883136
24h	0.533479	0.516988	0.467117	0.675977	0.642774	0.647909
	sn	sn	sn	tsb	tsb	tsb
0h	97.7051	102.573	99.7218	99.9202	96.524	103.556
2h	59.2738	57.7588	57.7042	88.2435	83.6861	87.2515
4h	61.3253	54.8629	57.7985	82.1105	81.276	80.9842
6h	49.9702	49.3344	51.3213	79.8813	79.788	81.9471
8h	39.3602	39.5241	39.395	87.7417	85.5942	88.3136
24h	53.3479	51.6988	46.7117	67.5977	64.2774	64.7909
AVERAGE	sn	tsb		STDEV	sn	tsb
0h	100	100		0h	2.44583	3.51653
2h	58.2456	86.3937		2h	0.890878	2.39678
4h	57.9956	81.4569		4h	3.23568	0.584506
6h	50.2086	80.5388		6h	1.01467	1.2205
8h	39.4265	87.2165		8h	0.0863686	1.43371
24h	50.5861	65.5553		24h	3.45518	1.78731

## Sheet: Fig.1-fig.suppl.2B
concentration (ug/ml)	1	1000	500	250	125	62.5	31.25	15.625	7.8125	3.90625	0
DMSO	0.0384	1.2067	0.9906	1.0489	1.0498	1.2222	0.8793	0.9241	0.9199	1.08	0.9625
DMSO	0.0368	1.0455	0.8502	0.8816	1.0403	0.8885	1.0042	0.8268	0.7557	0.6835	0.6528
Extract	0.0347	0.9184	0.5726	0.6136	1.1855	1.227	1.3127	1.4142	1.7808	1.038	1.4546
Extract	0.038	0.7245	0.5616	0.7869	1.2118	1.5189	1.2852	1.5982	1.2446	1.1457	1.1784
SN	0.0322	0.1496	0.5566	1.0586	1.1823	1.0971	0.986	1.0604	1.0478	1.1294	0.9537
SN	0.0377	0.2159	0.6874	1.652	1.1866	1.0461	1.0052	0.9967	1.0625	0.9969	1.0782
concentration (ug/ml)	1	1000	500	250	125	62.5	31.25	15.625	7.8125	3.90625	0
DMSO	0	1.1683	0.9522	1.0105	1.0114	1.1838	0.8409	0.8857	0.8815	1.0416	0.9241
DMSO	-0.0016	1.0071	0.8118	0.8432	1.0019	0.8501	0.9658	0.7884	0.7173	0.6451	0.6144
Extract	-0.0037	0.88	0.5342	0.5752	1.1471	1.1886	1.2743	1.3758	1.7424	0.9996	1.4162
Extract	-0.0004	0.6861	0.5232	0.7485	1.1734	1.4805	1.2468	1.5598	1.2062	1.1073	1.14
SN	-0.0062	0.1112	0.5182	1.0202	1.1439	1.0587	0.9476	1.022	1.0094	1.091	0.9153
SN	-0.0007	0.1775	0.649	1.6136	1.1482	1.0077	0.9668	0.9583	1.0241	0.9585	1.0398
concentration (ug/ml)		1000	500	250	125	62.5	31.25	15.625	7.8125	3.90625	0
DMSO		1.0877	0.882	0.92685	1.00665	1.01695	0.90335	0.83705	0.7994	0.84335	0.76925
Extract		0.78305	0.5287	0.66185	1.16025	1.33455	1.26055	1.4678	1.4743	1.05345	1.2781
SN		0.14435	0.5836	1.3169	1.14605	1.0332	0.9572	0.99015	1.01675	1.02475	0.97755
concentration (ug/ml)	1000	500	250	125	62.5	31.25	15.625	7.8125	3.90625	0
Extract	0.621381	0.377207	0.406157	0.809984	0.839288	0.899802	0.971473	1.23033	0.705833	1
Extract	0.601842	0.458947	0.656579	1.0293	1.29868	1.09368	1.36825	1.05807	0.971316	1
SN	0.12149	0.566153	1.11461	1.24975	1.15667	1.03529	1.11657	1.10281	1.19196	1
SN	0.170706	0.624158	1.55184	1.10425	0.969129	0.929794	0.92162	0.984901	0.921812	1
concentration (ug/ml)	1000	500	250	125	62.5	31.25	15.625	7.8125	3.90625	0
Extract	62.1381	37.7207	40.6157	80.9984	83.9288	89.9802	97.1473	123.033	70.5833	100
Extract	60.1842	45.8947	65.6579	102.93	129.868	109.368	136.825	105.807	97.1316	100
SN	12.149	56.6153	111.461	124.975	115.667	103.529	111.657	110.281	119.196	100
SN	17.0706	62.4158	155.184	110.425	96.9129	92.9794	92.162	98.4901	92.1812	100
(%) of SN or extract (1mg/ml)
AVERAGE	0	0.78125	1.5625	3.125	6.25	12.5	25	50	100
Extract	100	114.42	116.986	99.6743	106.899	91.9641	53.1368	41.8077	61.1612
SN	100	104.385	101.91	98.2542	106.29	117.7	133.322	59.5156	14.6098
SEM
Percentage (%)	0	7.8125	15.625	31.25	62.5	125	250	500	1000
Extract	0	8.61323	19.8386	9.6941	22.9698	10.9657	12.5211	4.08704	0.976953
SN	0	5.89534	9.74771	5.27474	9.37706	7.27517	21.8615	2.90027	2.46078
