# Supplementary material for: Antimicrobials from a feline commensal bacterium inhibit skin infection by drug-resistant S. pseudintermedius
Source: eLife. 2021 Oct 19;10:e66793. doi: 10.7554/eLife.66793 (PMC8592530; doi:10.7554/eLife.66793)
Supplement: Figure 1—source data 1. [file elife-66793-fig1-data1.xlsx]

## Sheet: Fig.1C
	12.5	25	50
	100	100	76.1205
	100	61.3693	1.44422
	100	86.505	75.1494
	100	85.4974	88.6703
	100	86.5464	99.3028
	100	76.6081	84.8108
	100	69.6788	63.0229
	100	68.6022	70.7171
	3.43248	16.3016	5.10458	S.p Q13
	81.3898	80.0865	7.94323
	80.6528	81.2598	58.2669
	82.6323	78.2783	82.1962
	84.359	76.3182	74.1783
	86.2543	71.5837	78.3367
	82.169	60.3478	2.56474	S.h A9
	81.6425	54.1502	22.4851
	73.1561	74.6756	51.3944
	75.2619	73.875	65.4631
	81.2003	69.665	56.3247
	2.67439	2.22232	4.40737	S.f N26
	80.4422	68.1053	77.0169
	83.0113	61.6177	69.7958
	78.0416	54.9922	55.4532
	81.6004	54.026	51.8426
	70.4396	67.139	48.008
	78.3364	74.3581	72.8835
	79.263	80.6524	87.7739
	79.0945	68.9749	73.6056
	80.0632	67.9948	77.8387
	82.3585	65.386	65.737
	80.716	60.2098	77.4651
	85.2856	61.6454	81.748
	9.413	0	2.61454	S. p N13
	73.8721	72.8398	74.253
	76.6518	63.426	55.6524
	78.3575	64.9305	70.6175
	81.1793	72.2739	91.8078
	78.8839	61.8524	72.51
	84.0642	59.0089	23.1325
	81.095	56.759	69.248
	78.4838	71.0178	57.6195
	13.9616	0.897212	3.11255	S. f V13
	75.6199	67.8016	58.1673
	75.9147	65.5241	71.5139
	78.1258	64.1851	71.2151
	81.2845	63.564	69.2729
	79.5157	53.253	57.1962
	85.5172	59.5058	27.1663
	74.1037	77.3259	58.3914
	76.2306	75.2278	62.3755
	78.547	71.2248	56.6235
	78.926	72.4809	74.8008
	79.4104	75.283	73.6803
	82.6744	69.6788	90.8615
	79.5578	60.0028	35.3337
	86.2122	60.9276	24.7261
	100	89.5831	100
	3.51672	39.1874	2.81374
	1.43196	2.36036	2.21613	S.f C4
	97.2256	69.9963	62.7739
	98.7628	69.0991	78.7102
	99.9631	68.7402	28.9094
	100	68.7126	84.1633
	100	64.2956	48.2072

## Sheet: Fig.1E
RAW values	Blank	100	80	60	40	20	10	5	1	0.5	0
K1100	0.45	7.308	9.708	11.328	13.398	15.498	16.776	17.172	17.28	16.842	16.872
K1100	0.636	7.212	9.138	10.728	12.57	14.844	15.936	16.95	16.794	16.494	16.872
5075	0	13.002	14.412	16.794	17.802	18.39	18.48	17.64	17.712	17.94	17.622
5075	0.132	13.134	15.852	16.56	18.594	18.834	19.65	18.504	18.306	17.874	18.42
E.cK1	0	3.408	8.574	11.202	13.218	14.526	15	14.808	14.826	14.73	15.666
E.cK1	0.084	3.342	9.078	11.322	13.992	15.546	16.05	16.338	16.236	16.356	16.206
PAO1	0	13.854	18.018	16.002	17.916	20.694	19.704	20.244	19.692	20.364	20.472
PAO1	0.048	13.68	19.686	17.172	19.164	19.722	19.854	27.024	20.706	21.054	21.216
WT	0	-0.498	-0.498	-0.312	-0.498	-0.456	-0.648	-0.648	0.354	17.514	19.482
WT	0.156	-0.384	-0.276	-0.258	-0.408	-0.36	-0.636	-0.588	1.17	18.534	20.166
ST71	0	-0.192	-0.282	-0.03	-0.234	-0.168	-0.462	5.628	26.082	28.14	28.272
ST71	0.126	-0.168	-0.192	0.264	-0.048	-0.174	-0.354	-0.492	25.08	28.416	28.602
PY79	0	-0.432	-0.372	-0.402	-0.516	-0.348	-0.456	1.566	13.272	12.618	11.796
PY79	0.078	-0.282	-0.216	-0.162	-0.288	-0.294	-0.534	-0.432	12.234	11.976	12.432
E.f	0	-0.306	-0.432	-0.552	-0.534	-0.408	-0.456	-0.612	3.018	3.192	2.52
E.f	0.072	-0.24	-0.168	-0.09	-0.048	-0.21	-0.462	-0.354	0.342	3.12	2.766
Norm values		100	80	60	40	20	10	5	1	0.5	0
K1100		43.3144	57.5391	67.1408	79.4097	91.8563	99.431	101.778	102.418	99.8222	100
K1100		42.7454	54.1607	63.5846	74.5021	87.9801	94.4523	100.462	99.5377	97.7596	100
5075		73.7828	81.7841	95.3013	101.021	104.358	104.869	100.102	100.511	101.805	100
5075		71.3029	86.0586	89.9023	100.945	102.248	106.678	100.456	99.3811	97.0358	100
E.cK1		21.7541	54.73	71.5052	84.3738	92.7231	95.7488	94.5232	94.6381	94.0253	100
E.cK1		20.622	56.0163	69.863	86.3384	95.9274	99.0374	100.815	100.185	100.926	100
PAO1		67.6729	88.0129	78.1653	87.5147	101.084	96.2485	98.8863	96.1899	99.4725	100
PAO1		64.4796	92.7885	80.9389	90.3281	92.9581	93.5803	127.376	97.5962	99.2364	100
WT		-2.55621	-2.55621	-1.60148	-2.55621	-2.34062	-3.32615	-3.32615	1.81706	89.8984	100
WT		-1.9042	-1.36864	-1.27938	-2.02321	-1.78518	-3.15382	-2.9158	5.80184	91.9072	100
ST71		-0.679117	-0.997453	-0.106112	-0.827674	-0.594228	-1.63413	19.9066	92.2538	99.5331	100
ST71		-0.587372	-0.671282	0.923012	-0.16782	-0.608349	-1.23768	-1.72016	87.6862	99.3497	100
PY79		-3.66226	-3.15361	-3.40793	-4.37436	-2.95015	-3.86572	13.2757	112.513	106.968	100
PY79		-2.26834	-1.73745	-1.30309	-2.3166	-2.36486	-4.29537	-3.4749	98.4073	96.332	100
E.f		-12.1429	-17.1429	-21.9048	-21.1905	-16.1905	-18.0952	-24.2857	119.762	126.667	100
E.f		-8.67679	-6.07375	-3.2538	-1.73536	-7.59219	-16.7028	-12.7983	12.3644	112.798	100
Norm. values (copy)	0	0.5	1	5	10	20	40	60	80	100
K1100	100	99.8222	102.418	101.778	99.431	91.8563	79.4097	67.1408	57.5391	43.3144
K1100	100	97.7596	99.5377	100.462	94.4523	87.9801	74.5021	63.5846	54.1607	42.7454
5075	100	101.805	100.511	100.102	104.869	104.358	101.021	95.3013	81.7841	73.7828
5075	100	97.0358	99.3811	100.456	106.678	102.248	100.945	89.9023	86.0586	71.3029
E.cK1	100	94.0253	94.6381	94.5232	95.7488	92.7231	84.3738	71.5052	54.73	21.7541
E.cK1	100	100.926	100.185	100.815	99.0374	95.9274	86.3384	69.863	56.0163	20.622
PAO1	100	99.4725	96.1899	98.8863	96.2485	101.084	87.5147	78.1653	88.0129	67.6729
PAO1	100	99.2364	97.5962	127.376	93.5803	92.9581	90.3281	80.9389	92.7885	64.4796
WT	100	89.8984	1.81706	0	0	0	0	0	0	0
WT	100	91.9072	5.80184	0	0	0	0	0	0	0
ST71	100	99.5331	92.2538	19.9066	0	0	0	0	0	0
ST71	100	99.3497	87.6862	0	0	0	0	0.923012	0	0
PY79	100	100.382	105.585	12.4582	0	0	0	0	0	0
PY79	100	85.0085	86.8399	0	0	0	0	0	0	0
E.f	100	96.3768	91.1232	0	0	0	0	0	0	0
E.f	100	85.1064	9.32897	0	0	0	0	0	0	0
AVERAGE VALUES	0	0.5	1	5	10	20	40	60	80	100
K1100	100	98.7909	100.978	101.12	96.9417	89.9182	76.9559	65.3627	55.8499	43.0299
5075	100	99.4202	99.9459	100.279	105.773	103.303	100.983	92.6018	83.9214	72.5429
E.cK1	100	97.4754	97.4116	97.6688	97.3931	94.3253	85.3561	70.6841	55.3731	21.1881
PAO1	100	99.3544	96.893	113.131	94.9144	97.0213	88.9214	79.5521	90.4007	66.0763
WT	100	90.9028	3.80945	0	0	0	0	0	0	0
PY79	100	92.6952	96.2123	6.22912	0	0	0	0	0	0
ST71	100	99.4414	89.97	9.95331	0	0	0	0.461506	0	0
E.f	100	90.7416	50.2261	0	0	0	0	0	0	0
STDEV	0	0.5	1	5	10	20	40	60	80	100
K1100	0	1.45847	2.03683	0.930404	3.52045	2.74092	3.47015	2.5146	2.38887	0.402337
5075	0	3.372	0.79876	0.250232	1.27888	1.49244	0.0543235	3.8177	3.02253	1.75351
E.cK1	0	4.87925	3.92235	4.44865	2.32542	2.26581	1.38917	1.16118	0.909553	0.800534
PAO1	0	0.166895	0.994359	20.145	1.88671	5.74614	1.98937	1.96124	3.37684	2.25799
WT	0	1.42044	2.81767	0	0	0	0	0	0	0
PY79	0	10.8706	13.2546	8.8093	0	0	0	0	0	0
ST71	0	0.129691	3.22981	14.0761	0	0	0	0.652668	0	0
E.f	0	7.9694	57.8372	0	0	0	0	0	0	0
SEM	0	0.5	1	5	10	20	40	60	80	100
K1100	0	1.03129	1.44026	0.657895	2.48933	1.93812	2.45377	1.77809	1.68919	0.284495
5075	0	2.38437	0.564809	0.176941	0.904305	1.05532	0.0384125	2.69952	2.13725	1.23992
E.cK1	0	3.45015	2.77352	3.14567	1.64432	1.60217	0.982295	0.821078	0.643151	0.566063
PAO1	0	0.118012	0.703118	14.2446	1.33411	4.06313	1.4067	1.38681	2.38778	1.59664
WT	0	1.0044	1.99239	0	0	0	0	0	0	0
PY79	0	7.68667	9.37243	6.22912	0	0	0	0	0	0
ST71	0	0.0917056	2.28382	9.95331	0	0	0	0.461506	0	0
E.f	0	5.63521	40.8971	0	0	0	0	0	0	0
