# Supplementary material for: Antimicrobials from a feline commensal bacterium inhibit skin infection by drug-resistant S. pseudintermedius
Source: eLife. 2021 Oct 19;10:e66793. doi: 10.7554/eLife.66793 (PMC8592530; doi:10.7554/eLife.66793)
Supplement: Figure 2—source data 4. [file elife-66793-fig2-data4.xlsx]

## Sheet: Raw Fig.2E 
Checked	Protein FDR Confidence	Master	Accession	Description	Sequence	FASTA Title Lines	Exp. q-value	Sum PEP Score	Coverage	# Peptides	# PSMs	# Unique Peptides	# Protein Groups	# AAs	MW [kDa]	calc. pI	Found in File: [F1] DG009785_Gallo_26	Found in File: [F2] DG009790_Gallo_30	Found in File: [F3] DG009795_Gallo_32	Found in File: [F4] DG009800_Gallo_36	Area: F1: Sample_Fraction_26	Area: F2: Sample_Fraction_30	Area: F3: Sample_Fraction_32	Area: F4: Sample_Fraction_36	Score Sequest HT	# Peptides Sequest HT
FALSE	High	Master Protein	f3.28776	f3.28776	MNIKNFIITSTLATVLSTSFVGGLTLGEADAQTTRTADEYYDATVKQELQALLNDLNVNELATASLEPYYKRSVKRAGYMAKSALKSNDFYQMSRAKYELQKIYDEIDEALLEE	>f3.28776	0	42.08	56.1404	23	62	23	1	114	12.8	4.79	High	High	High	High	945027	8.83447e+06	5.115e+06	1.70223e+06	165.81	23
	Checked	Confidence	Identifying Node	Search ID	PSM Ambiguity	Annotated Sequence	Modifications	# Protein Groups	# Proteins	Master Protein Accessions	Protein Accessions	Protein Descriptions	# Missed Cleavages	Charge	DeltaScore	DeltaCn	Rank	Search Engine Rank	m/z [Da]	MH+ [Da]	DeltaM [ppm]	Deltam/z [Da]	Activation Type	MS Order	Isolation Interference [%]	Ion Inject Time [ms]	RT [min]	First Scan	Spectrum File	Ions Matched	Annotation	XCorr	Area	Apex RT [min]	Percolator q-Value	Percolator PEP
	FALSE	High	Sequest HT (A2)	A	Unambiguous	DEIDEALLEE		1	2	f3.28776	r1.19284; f3.28776	r1.19284; f3.28776	0	2	0.159	0	1	1	588.27	1175.53	1.26	0.00074	CID (Collision Induced Dissociation)	MS2	100	769.156	57.3291	6120	DG009795_Gallo_32.raw	0/0		2.83	8.45585e+06	57.61	0	0.1066
	FALSE	High	Sequest HT (A2)	A	Unambiguous	ELQKIYDEIDEALLEE		1	2	f3.28776	r1.19284; f3.28776	r1.19284; f3.28776	0	2	0.3961	0	1	1	975.486	1949.96	2.59	0.00252	CID (Collision Induced Dissociation)	MS2	0	582.957	77.3721	8742	DG009790_Gallo_30.raw	0/0		4.14	1.32422e+07	77.52	0	0.008941
	FALSE	High	Sequest HT (A2)	A	Unambiguous	VLSTSFVGGLTLGE		1	2	f3.28776	r1.19284; f3.28776	r1.19284; f3.28776	0	2	0.4138	0	1	1	690.376	1379.75	2.44	0.00169	CID (Collision Induced Dissociation)	MS2	0	984.304	76.639	8132	DG009800_Gallo_36.raw	0/0		3.48	803017	76.71	0	0.001096
	FALSE	High	Sequest HT (A2)	A	Unambiguous	VLSTSFVGGLTLGE		1	2	f3.28776	r1.19284; f3.28776	r1.19284; f3.28776	0	2	0.4229	0	1	1	690.377	1379.75	3.06	0.00211	CID (Collision Induced Dissociation)	MS2	0	298.524	76.3876	8560	DG009790_Gallo_30.raw	0/0		3.76	1.67944e+07	76.49	0	0.001084
	FALSE	High	Sequest HT (A2)	A	Unambiguous	QTTRTADEYYDATVKQELQALLND		1	2	f3.28776	r1.19284; f3.28776	r1.19284; f3.28776	0	3	0.1089	0	1	1	929.458	2786.36	4.15	0.00385	CID (Collision Induced Dissociation)	MS2	7.57466	236.713	74.9566	8303	DG009790_Gallo_30.raw	0/0		2.48			0	0.01393
	FALSE	High	Sequest HT (A2)	A	Unambiguous	ATVLSTSFVGGLTLGE		1	2	f3.28776	r1.19284; f3.28776	r1.19284; f3.28776	0	2	0.4533	0	1	1	776.417	1551.83	0.08	6e-05	CID (Collision Induced Dissociation)	MS2	0	143.802	79.0361	8696	DG009795_Gallo_32.raw	0/0		3.53			0	0.005508
	FALSE	High	Sequest HT (A2)	A	Unambiguous	ELQKIYDEIDEALLEE		1	2	f3.28776	r1.19284; f3.28776	r1.19284; f3.28776	0	2	0.2232	0	1	1	975.486	1949.97	3.27	0.00319	CID (Collision Induced Dissociation)	MS2	0	731.611	78.2156	8541	DG009795_Gallo_32.raw	0/0		2.33	54984.4	78.19	0	0.01032
	FALSE	High	Sequest HT (A2)	A	Unambiguous	DEIDEALLEE		1	2	f3.28776	r1.19284; f3.28776	r1.19284; f3.28776	0	2	0.0537	0	1	1	588.271	1175.53	2.61	0.00153	CID (Collision Induced Dissociation)	MS2	0	1000	60.1247	6525	DG009800_Gallo_36.raw	0/0		2.42	135006	60.44	0	0.08338
	FALSE	High	Sequest HT (A2)	A	Unambiguous	DEIDEALLEE		1	2	f3.28776	r1.19284; f3.28776	r1.19284; f3.28776	0	2	0.235	0	1	1	588.27	1175.53	1.67	0.00098	CID (Collision Induced Dissociation)	MS2	0	715.717	58.9098	6403	DG009800_Gallo_36.raw	0/0		2.34			0	0.07099
	FALSE	High	Sequest HT (A2)	A	Unambiguous	DEIDEALLEE		1	2	f3.28776	r1.19284; f3.28776	r1.19284; f3.28776	0	2	0.0826	0	1	1	588.271	1175.53	2.61	0.00153	CID (Collision Induced Dissociation)	MS2	31.8691	692.431	57.3726	6252	DG009800_Gallo_36.raw	0/0		2.3	4.19199e+06	57.8	0	0.04303
	FALSE	High	Sequest HT (A2)	A	Unambiguous	ELQKIYDEIDEALLEE		1	2	f3.28776	r1.19284; f3.28776	r1.19284; f3.28776	0	2	0.2677	0	1	1	975.485	1949.96	2.4	0.00234	CID (Collision Induced Dissociation)	MS2	0	1000	77.6313	8487	DG009795_Gallo_32.raw	0/0		2.69	1.13458e+06	77.81	0	0.05768
	FALSE	High	Sequest HT (A2)	A	Unambiguous	LSTSFVGGLTLGEADA		1	2	f3.28776	r1.19284; f3.28776	r1.19284; f3.28776	0	2	0.4006	0	1	1	769.393	1537.78	2.56	0.00197	CID (Collision Induced Dissociation)	MS2	0	492.919	73.2722	7951	DG009795_Gallo_32.raw	0/0		3.12	292036	73.27	0	0.007815
	FALSE	High	Sequest HT (A2)	A	Unambiguous	LSTSFVGGLTLGE		1	2	f3.28776	r1.19284; f3.28776	r1.19284; f3.28776	0	2	0.3697	0	1	1	640.841	1280.68	1.53	0.00098	CID (Collision Induced Dissociation)	MS2	25.5566	735.685	72.8295	7891	DG009795_Gallo_32.raw	0/0		2.84	1.61155e+06	72.89	0	0.02495
	FALSE	High	Sequest HT (A2)	A	Selected	IYDEIDEALLEE		1	2	f3.28776	r1.19284; f3.28776	r1.19284; f3.28776	0	2	0.0388	0	1	1	726.345	1451.68	2.24	0.00163	CID (Collision Induced Dissociation)	MS2	0	321.367	68.5478	7384	DG009795_Gallo_32.raw	0/0		2.32	154227	68.5	0	0.03677
	FALSE	High	Sequest HT (A2)	A	Unambiguous	VLSTSFVGGLTLGE		1	2	f3.28776	r1.19284; f3.28776	r1.19284; f3.28776	0	2	0.2551	0	1	1	690.376	1379.75	2.44	0.00169	CID (Collision Induced Dissociation)	MS2	40.8563	584.923	77.0189	8417	DG009795_Gallo_32.raw	0/0		2.47	1.8222e+07	76.58	0	0.09679
	FALSE	High	Sequest HT (A2)	A	Unambiguous	VLSTSFVGGLTLGEADA		1	2	f3.28776	r1.19284; f3.28776	r1.19284; f3.28776	0	2	0.4257	0	1	1	818.927	1636.85	2.97	0.00243	CID (Collision Induced Dissociation)	MS2	0	201.778	76.8201	8388	DG009795_Gallo_32.raw	0/0		3.5	5.93477e+06	76.86	0	0.0006267
	FALSE	High	Sequest HT (A2)	A	Unambiguous	VLSTSFVGGLTLGE		1	2	f3.28776	r1.19284; f3.28776	r1.19284; f3.28776	0	2	0.482	0	1	1	690.376	1379.75	2.44	0.00169	CID (Collision Induced Dissociation)	MS2	0	733.409	76.4402	8330	DG009795_Gallo_32.raw	0/0		3.61	1.8222e+07	76.58	0	0.003075
	FALSE	High	Sequest HT (A2)	A	Unambiguous	VLSTSFVGGLTLGEADA		1	2	f3.28776	r1.19284; f3.28776	r1.19284; f3.28776	0	2	0.4239	0	1	1	818.927	1636.85	2.82	0.00231	CID (Collision Induced Dissociation)	MS2	26.8237	243.406	76.7033	8614	DG009790_Gallo_30.raw	0/0		4.27	5.4599e+06	76.76	0	0.00952
	FALSE	High	Sequest HT (A2)	A	Unambiguous	QTTRTADEYYDATVKQELQALLND		1	2	f3.28776	r1.19284; f3.28776	r1.19284; f3.28776	0	3	0.1972	0	1	1	929.457	2786.36	3.36	0.00312	CID (Collision Induced Dissociation)	MS2	0	731.662	73.3205	8065	DG009790_Gallo_30.raw	0/0		2.89	6.21944e+07	73.5	0	0.01431
	FALSE	High	Sequest HT (A2)	A	Unambiguous	DEIDEALLEE		1	2	f3.28776	r1.19284; f3.28776	r1.19284; f3.28776	0	2	0.2584	0	1	1	588.27	1175.53	0.64	0.00037	CID (Collision Induced Dissociation)	MS2	25.2692	441.399	57.2593	6085	DG009790_Gallo_30.raw	0/0		2.67	2.09317e+07	57.6	0	0.06112
	FALSE	High	Sequest HT (A2)	A	Unambiguous	DEIDEALLEE		1	2	f3.28776	r1.19284; f3.28776	r1.19284; f3.28776	0	2	0.2182	0	1	1	588.27	1175.53	1.78	0.00105	CID (Collision Induced Dissociation)	MS2	0	194.446	57.7959	6143	DG009790_Gallo_30.raw	0/0		2.75	2.09317e+07	57.6	0	0.0933
	FALSE	High	Sequest HT (A2)	A	Unambiguous	DEIDEALLEE		1	2	f3.28776	r1.19284; f3.28776	r1.19284; f3.28776	0	2	0.2659	0	1	1	588.27	1175.53	1.78	0.00105	CID (Collision Induced Dissociation)	MS2	5.09629	229.662	58.344	6199	DG009790_Gallo_30.raw	0/0		2.67			0	0.09173
	FALSE	High	Sequest HT (A2)	A	Unambiguous	DEIDEALLEE		1	2	f3.28776	r1.19284; f3.28776	r1.19284; f3.28776	0	2	0.2405	0	1	1	588.27	1175.53	1.88	0.00111	CID (Collision Induced Dissociation)	MS2	27.4008	1000	60.0389	6386	DG009790_Gallo_30.raw	0/0		2.62	111009	60.2	0	0.05387
	FALSE	High	Sequest HT (A2)	A	Unambiguous	DEIDEALLEE		1	2	f3.28776	r1.19284; f3.28776	r1.19284; f3.28776	0	2	0.2137	0	1	1	588.27	1175.53	1.36	0.0008	CID (Collision Induced Dissociation)	MS2	0	736.892	59.4601	6328	DG009790_Gallo_30.raw	0/0		2.48	274674	59.41	0	0.06874
	FALSE	High	Sequest HT (A2)	A	Unambiguous	QTTRTADEYYD		1	2	f3.28776	r1.19284; f3.28776	r1.19284; f3.28776	0	2	0.1859	0	1	1	681.796	1362.58	2.18	0.00149	CID (Collision Induced Dissociation)	MS2	0	661.977	14.8126	1637	DG009790_Gallo_30.raw	0/0		1.56			0	0.05652
	FALSE	High	Sequest HT (A2)	A	Unambiguous	QTTRTADEYYD		1	2	f3.28776	r1.19284; f3.28776	r1.19284; f3.28776	0	2	0.3158	0	1	1	681.796	1362.58	2.63	0.00179	CID (Collision Induced Dissociation)	MS2	0	479.078	14.3027	1582	DG009790_Gallo_30.raw	0/0		1.9	4.87597e+07	14.46	0	0.01632
	FALSE	High	Sequest HT (A2)	A	Unambiguous	TTRTADEYYD		1	2	f3.28776	r1.19284; f3.28776	r1.19284; f3.28776	0	2	0.2074	0	1	1	617.766	1234.53	2.69	0.00166	CID (Collision Induced Dissociation)	MS2	0	1000	13.737	1525	DG009790_Gallo_30.raw	0/0		2.17	4.72287e+06	13.93	0	0.05917
	FALSE	High	Sequest HT (A2)	A	Unambiguous	VLSTSFVGGLTLGEADA		1	2	f3.28776	r1.19284; f3.28776	r1.19284; f3.28776	0	2	0.4091	0	1	1	818.926	1636.85	1.55	0.00127	CID (Collision Induced Dissociation)	MS2	0	257.094	76.9053	8816	DG009785_Gallo_26.raw	0/0		3.52	401328	76.9	0	0.002909
	FALSE	High	Sequest HT (A2)	A	Unambiguous	VLSTSFVGGLTLGE		1	2	f3.28776	r1.19284; f3.28776	r1.19284; f3.28776	0	2	0.3688	0	1	1	690.376	1379.75	2.44	0.00169	CID (Collision Induced Dissociation)	MS2	0	212.404	76.5719	8756	DG009785_Gallo_26.raw	0/0		2.82	1.48873e+06	76.63	0	0.001945
	FALSE	High	Sequest HT (A2)	A	Unambiguous	QTTRTADEYYD		1	2	f3.28776	r1.19284; f3.28776	r1.19284; f3.28776	0	2	0.313	0	1	1	681.796	1362.58	2.45	0.00167	CID (Collision Induced Dissociation)	MS2	0	1000	16.9801	1855	DG009790_Gallo_30.raw	0/0		2.3	159567	16.95	0	0.00985
	FALSE	High	Sequest HT (A2)	A	Unambiguous	QTTRTADEYYDA		1	2	f3.28776	r1.19284; f3.28776	r1.19284; f3.28776	0	2	0.2479	0	1	1	717.314	1433.62	2.16	0.00155	CID (Collision Induced Dissociation)	MS2	0	706.617	17.8305	1940	DG009790_Gallo_30.raw	0/0		2.38	675277	17.85	0	0.06668
	FALSE	High	Sequest HT (A2)	A	Unambiguous	QTTRTADEYYDATVK		1	2	f3.28776	r1.19284; f3.28776	r1.19284; f3.28776	0	3	0.3088	0	1	1	587.949	1761.83	2.13	0.00125	HCD (High Energy Collision Dissociation)	MS2	29.3416	679.078	20.8391	2255	DG009790_Gallo_30.raw	0/0		3.53	151337	20.83	0	0.08105
	FALSE	High	Sequest HT (A2)	A	Unambiguous	GLTLGEADAQTTRTADEYYD		1	2	f3.28776	r1.19284; f3.28776	r1.19284; f3.28776	0	2	0.5397	0	1	1	1095.5	2189.99	3.41	0.00373	CID (Collision Induced Dissociation)	MS2	0	912.851	45.0293	4767	DG009790_Gallo_30.raw	0/0		3.78	770180	45.09	0	0.0008345
	FALSE	High	Sequest HT (A2)	A	Unambiguous	GLTLGEADAQTTRTADEY		1	2	f3.28776	r1.19284; f3.28776	r1.19284; f3.28776	0	2	0.4986	0	1	1	956.453	1911.9	2.85	0.00272	CID (Collision Induced Dissociation)	MS2	41.3952	1000	41.1833	4366	DG009790_Gallo_30.raw	0/0		3.45	506420	41.16	0	0.002849
	FALSE	High	Sequest HT (A2)	A	Unambiguous	GLTLGEADAQTTRTADE		1	2	f3.28776	r1.19284; f3.28776	r1.19284; f3.28776	0	2	0.523	0	1	1	874.92	1748.83	2.26	0.00198	CID (Collision Induced Dissociation)	MS2	0	979.222	33.0465	3528	DG009790_Gallo_30.raw	0/0		3.92	699654	33.05	0	0.0007187
	FALSE	High	Sequest HT (A2)	A	Unambiguous	GLTLGEADAQTTRTAD		1	2	f3.28776	r1.19284; f3.28776	r1.19284; f3.28776	0	2	0.3686	0	1	1	810.398	1619.79	1.38	0.00112	CID (Collision Induced Dissociation)	MS2	0	842.08	32.3458	3454	DG009790_Gallo_30.raw	0/0		2.74	590823	32.19	0	0.05063
	FALSE	High	Sequest HT (A2)	A	Selected	QTTRTADEYYDATVKQE		1	2	f3.28776	r1.19284; f3.28776	r1.19284; f3.28776	0	3	0.0498	0	1	1	673.65	2018.93	1.93	0.0013	CID (Collision Induced Dissociation)	MS2	0	1000	22.4228	2412	DG009790_Gallo_30.raw	0/0		2.61	1.44209e+06	22.5	0	0.03195
	FALSE	High	Sequest HT (A2)	A	Unambiguous	DEIDEALLEE		1	2	f3.28776	r1.19284; f3.28776	r1.19284; f3.28776	0	2	0.1128	0	1	1	588.27	1175.53	1.57	0.00092	CID (Collision Induced Dissociation)	MS2	0	982.004	60.5669	6447	DG009790_Gallo_30.raw	0/0		2.57	185048	60.6	0	0.1056
	FALSE	High	Sequest HT (A2)	A	Unambiguous	DEIDEALLEE		1	2	f3.28776	r1.19284; f3.28776	r1.19284; f3.28776	0	2	0.166	0	1	1	588.271	1175.53	2.3	0.00135	CID (Collision Induced Dissociation)	MS2	0	1000	58.885	6259	DG009790_Gallo_30.raw	0/0		2.35	103943	59	0	0.05162
	FALSE	High	Sequest HT (A2)	A	Unambiguous	LQALLNDLNVNE		1	2	f3.28776	r1.19284; f3.28776	r1.19284; f3.28776	0	2	0.2461	0	1	1	678.363	1355.72	2.31	0.00157	CID (Collision Induced Dissociation)	MS2	0	936.905	65.1139	6963	DG009790_Gallo_30.raw	0/0		3.21	384617	65.11	0	0.05218
	FALSE	High	Sequest HT (A2)	A	Unambiguous	IYDEIDEALLEE		1	2	f3.28776	r1.19284; f3.28776	r1.19284; f3.28776	0	2	0.25	0	1	1	726.345	1451.68	3.34	0.00242	CID (Collision Induced Dissociation)	MS2	0	275.535	68.3738	7394	DG009790_Gallo_30.raw	0/0		2.52	1.0581e+06	68.43	0	0.01394
	FALSE	High	Sequest HT (A2)	A	Unambiguous	LQKIYDEIDEALLEE		1	2	f3.28776	r1.19284; f3.28776	r1.19284; f3.28776	0	2	0.3242	0	1	1	910.965	1820.92	3.57	0.00325	CID (Collision Induced Dissociation)	MS2	0	485.091	68.8184	7456	DG009790_Gallo_30.raw	0/0		2.93	2.82657e+06	68.94	0	0.01508
	FALSE	High	Sequest HT (A2)	A	Unambiguous	LSTSFVGGLTLGE		1	2	f3.28776	r1.19284; f3.28776	r1.19284; f3.28776	0	2	0.2862	0	1	1	640.841	1280.68	1.91	0.00122	CID (Collision Induced Dissociation)	MS2	9.73241	880.402	72.847	8008	DG009790_Gallo_30.raw	0/0		2.76	1.11473e+06	72.85	0	0.02813
	FALSE	High	Sequest HT (A2)	A	Unambiguous	LSTSFVGGLTLGEADA		1	2	f3.28776	r1.19284; f3.28776	r1.19284; f3.28776	0	2	0.3408	0	1	1	769.391	1537.78	0.74	0.00057	CID (Collision Induced Dissociation)	MS2	27.9331	1000	73.1931	8051	DG009790_Gallo_30.raw	0/0		3.14	387249	73.23	0	0.007967
	FALSE	High	Sequest HT (A2)	A	Unambiguous	VLSTSFVGGLTLGEADA		1	2	f3.28776	r1.19284; f3.28776	r1.19284; f3.28776	0	2	0.4444	0	1	1	818.927	1636.85	2.07	0.0017	CID (Collision Induced Dissociation)	MS2	0	1000	77.022	8166	DG009800_Gallo_36.raw	0/0		2.88	111683	77.02	0	0.04863
	FALSE	High	Sequest HT (A2)	A	Unambiguous	DEIDEALLEE		1	2	f3.28776	r1.19284; f3.28776	r1.19284; f3.28776	0	2	0.1471	0	1	1	588.27	1175.53	1.47	0.00086	CID (Collision Induced Dissociation)	MS2	0	608.63	61.1109	6502	DG009790_Gallo_30.raw	0/0		2.38	167350	61.17	0	0.06403
	FALSE	High	Sequest HT (A2)	A	Unambiguous	QTTRTADEYYD		1	2	f3.28776	r1.19284; f3.28776	r1.19284; f3.28776	0	2	0.0636	0	1	1	681.796	1362.58	2.18	0.00149	CID (Collision Induced Dissociation)	MS2	0	1000	19.6895	2137	DG009790_Gallo_30.raw	0/0		1.73	81613.8	19.69	0.003364	0.1202
	FALSE	High	Sequest HT (A2)	A	Unambiguous	QTTRTADEYYD		1	2	f3.28776	r1.19284; f3.28776	r1.19284; f3.28776	0	2	0.157	0	1	1	681.795	1362.58	2	0.00136	CID (Collision Induced Dissociation)	MS2	0	668.701	21.3956	2310	DG009790_Gallo_30.raw	0/0		1.72	385030	21.33	0.003364	0.1543
	FALSE	High	Sequest HT (A2)	A	Unambiguous	QTTRTADEYYDATVKQELQA		1	2	f3.28776	r1.19284; f3.28776	r1.19284; f3.28776	0	3	0.1422	0	1	1	777.709	2331.11	0.75	0.00059	CID (Collision Induced Dissociation)	MS2	23.8411	910.762	38.999	4148	DG009790_Gallo_30.raw	0/0		2.25	542281	39.05	0.003364	0.1292
	FALSE	High	Sequest HT (A2)	A	Unambiguous	QTTRTADEYYDATVKQELQALLND		1	2	f3.28776	r1.19284; f3.28776	r1.19284; f3.28776	0	3	0.1169	0	1	1	929.456	2786.35	1.65	0.00153	CID (Collision Induced Dissociation)	MS2	29.3837	235.226	76.0315	8490	DG009790_Gallo_30.raw	0/0		2.31	1.70364e+06	76.05	0.003364	0.1556
	FALSE	High	Sequest HT (A2)	A	Unambiguous	KIYDEIDEALLEE		1	2	f3.28776	r1.19284; f3.28776	r1.19284; f3.28776	0	2	0.1922	0	1	1	790.393	1579.78	2.68	0.00212	CID (Collision Induced Dissociation)	MS2	0	731.264	61.9032	6594	DG009790_Gallo_30.raw	0/0		2.55			0.003364	0.1335
	FALSE	High	Sequest HT (A2)	A	Unambiguous	QTTRTADEYYD		1	2	f3.28776	r1.19284; f3.28776	r1.19284; f3.28776	0	2	0.2826	0	1	1	681.796	1362.58	2.27	0.00155	CID (Collision Induced Dissociation)	MS2	0	989.372	15.4024	1696	DG009790_Gallo_30.raw	0/0		1.84			0.003364	0.1457
	FALSE	High	Sequest HT (A2)	A	Unambiguous	QTTRTADE		1	2	f3.28776	r1.19284; f3.28776	r1.19284; f3.28776	0	2	0.1765	0	1	1	461.218	921.429	1.68	0.00077	CID (Collision Induced Dissociation)	MS2	3.97341	559.337	5.2435	544	DG009790_Gallo_30.raw	0/0		1.87	2.26935e+06	5.02	0.003364	0.1292
	FALSE	High	Sequest HT (A2)	A	Unambiguous	DEIDEALLEE		1	2	f3.28776	r1.19284; f3.28776	r1.19284; f3.28776	0	2	0.2418	0	1	1	588.271	1175.53	1.99	0.00117	CID (Collision Induced Dissociation)	MS2	7.23809	341.072	57.8375	6183	DG009795_Gallo_32.raw	0/0		2.73	8.45585e+06	57.61	0.003364	0.1486
	FALSE	High	Sequest HT (A2)	A	Unambiguous	DEIDEALLEE		1	2	f3.28776	r1.19284; f3.28776	r1.19284; f3.28776	0	2	0.1506	0	1	1	588.27	1175.53	1.78	0.00105	CID (Collision Induced Dissociation)	MS2	7.09976	941.422	57.8936	6303	DG009800_Gallo_36.raw	0/0		2.59	4.19199e+06	57.8	0.003364	0.1382
	FALSE	High	Sequest HT (A2)	A	Unambiguous	DEIDEALLEE		1	2	f3.28776	r1.19284; f3.28776	r1.19284; f3.28776	0	2	0.1745	0	1	1	588.27	1175.53	1.47	0.00086	CID (Collision Induced Dissociation)	MS2	0	667.916	58.4033	6355	DG009800_Gallo_36.raw	0/0		2.35			0.003364	0.1128
	FALSE	High	Sequest HT (A2)	A	Unambiguous	DEIDEALLEE		1	2	f3.28776	r1.19284; f3.28776	r1.19284; f3.28776	0	2	0.0647	0	1	1	588.27	1175.53	1.67	0.00098	CID (Collision Induced Dissociation)	MS2	0	599.248	62.7843	6694	DG009790_Gallo_30.raw	0/0		2.32			0.003364	0.1141
	FALSE	High	Sequest HT (A2)	A	Unambiguous	LQKIYDEIDEALLEE		1	2	f3.28776	r1.19284; f3.28776	r1.19284; f3.28776	0	2	0.1187	0	1	1	910.964	1820.92	1.96	0.00178	CID (Collision Induced Dissociation)	MS2	0	1000	68.9024	7424	DG009795_Gallo_32.raw	0/0		2.19			0.003364	0.1359
	FALSE	High	Sequest HT (A2)	A	Unambiguous	DEIDEALLEE		1	2	f3.28776	r1.19284; f3.28776	r1.19284; f3.28776	0	2	0.0657	0	1	1	588.271	1175.53	2.5	0.00147	CID (Collision Induced Dissociation)	MS2	15.4927	337.012	58.9232	6303	DG009795_Gallo_32.raw	0/0		2.13			0.005932	0.1732
	FALSE	High	Sequest HT (A2)	A	Selected	DEIDEALLEE		1	2	f3.28776	r1.19284; f3.28776	r1.19284; f3.28776	0	2	0.0374	0	1	1	588.271	1175.53	1.99	0.00117	CID (Collision Induced Dissociation)	MS2	0	1000	60.6373	6575	DG009800_Gallo_36.raw	0/0		1.87	90164.8	60.66	0.005932	0.1592
	FALSE	High	Sequest HT (A2)	A	Unambiguous	KIYDEIDEALLEE		1	2	f3.28776	r1.19284; f3.28776	r1.19284; f3.28776	0	2	0.1131	0	1	1	790.393	1579.78	2.99	0.00236	CID (Collision Induced Dissociation)	MS2	31.8907	988.17	61.9827	6625	DG009795_Gallo_32.raw	0/0		2.74			0.005932	0.1727
	FALSE	High	Sequest HT (A2)	A	Unambiguous	DEIDEALLEE		1	2	f3.28776	r1.19284; f3.28776	r1.19284; f3.28776	0	2	0.1166	0	1	1	588.271	1175.54	3.34	0.00196	CID (Collision Induced Dissociation)	MS2	0	1000	59.4489	6364	DG009795_Gallo_32.raw	0/0		2.23	48889.4	59.44	0.005932	0.206
FALSE	High	Master Protein	f2.19411	f2.19411	EMADLINAIKTTVEAGLNGEWTDMGFGIADIVAKGIDVISGFFG	>f2.19411; >f1.19183	0	32.812	97.7273	13	50	3	1	44	4.6	4.08	Not Found	High	High	Not Found		2.52057e+06	1.10328e+07		187.8	13
	Checked	Confidence	Identifying Node	Search ID	PSM Ambiguity	Annotated Sequence	Modifications	# Protein Groups	# Proteins	Master Protein Accessions	Protein Accessions	Protein Descriptions	# Missed Cleavages	Charge	DeltaScore	DeltaCn	Rank	Search Engine Rank	m/z [Da]	MH+ [Da]	DeltaM [ppm]	Deltam/z [Da]	Activation Type	MS Order	Isolation Interference [%]	Ion Inject Time [ms]	RT [min]	First Scan	Spectrum File	Ions Matched	Annotation	XCorr	Area	Apex RT [min]	Percolator q-Value	Percolator PEP
	FALSE	High	Sequest HT (A2)	A	Unambiguous	FGIADIVAKG		2	2	f2.19411; f3.19496	f2.19411; f3.19496	f2.19411; f3.19496	0	2	0.2565	0	1	1	495.786	990.564	2.18	0.00108	CID (Collision Induced Dissociation)	MS2	0	451.333	59.2339	6338	DG009795_Gallo_32.raw	0/0		2.69	1.05393e+06	59.22	0	0.06598
	FALSE	High	Sequest HT (A2)	A	Unambiguous	mGFGIADIVAKG	M1(Oxidation)	2	2	f2.19411; f3.19496	f2.19411; f3.19496	f2.19411; f3.19496	0	2	0.3426	0	1	1	597.814	1194.62	2.13	0.00127	CID (Collision Induced Dissociation)	MS2	22.2789	490.827	59.2872	6345	DG009795_Gallo_32.raw	0/0		3.59	3.61195e+06	59.45	0	0.009431
	FALSE	High	Sequest HT (A2)	A	Unambiguous	mGFGIADIVAKG	M1(Oxidation)	2	2	f2.19411; f3.19496	f2.19411; f3.19496	f2.19411; f3.19496	0	2	0.2222	0	1	1	597.815	1194.62	2.64	0.00158	CID (Collision Induced Dissociation)	MS2	0	584.721	59.838	6411	DG009795_Gallo_32.raw	0/0		3.06	3.61195e+06	59.45	0	0.07719
	FALSE	High	Sequest HT (A2)	A	Rejected	mADLINAIKTTVEAG	M1(Oxidation)	1	1	f2.19411	f2.19411	f2.19411	0	3		0.0163	2	2	521.608	1562.81	0.77	0.0004	HCD (High Energy Collision Dissociation)	MS2	0	660.59	66.8349	7184	DG009795_Gallo_32.raw	0/0		3.61	639239	66.8	0	0.01637
	FALSE	High	Sequest HT (A2)	A	Selected	mADLINAIKTTVEAG	M1(Oxidation)	1	1	f2.19411	f2.19411	f2.19411	0	2	0.0029	0	1	1	781.909	1562.81	0.35	0.00027	CID (Collision Induced Dissociation)	MS2	38.3755	266.298	66.6778	7166	DG009795_Gallo_32.raw	0/0		3.46	4.17229e+06	66.8	0	0.005424
	FALSE	High	Sequest HT (A2)	A	Unambiguous	TDmGFGIADIVAKG	M3(Oxidation)	2	2	f2.19411; f3.19496	f2.19411; f3.19496	f2.19411; f3.19496	0	2	0.3274	0	1	1	705.852	1410.7	2.64	0.00186	CID (Collision Induced Dissociation)	MS2	0	1000	64.2892	6883	DG009795_Gallo_32.raw	0/0		2.81	113431	64.37	0	0.01558
	FALSE	High	Sequest HT (A2)	A	Unambiguous	TDmGFGIADIVAKG	M3(Oxidation)	2	2	f2.19411; f3.19496	f2.19411; f3.19496	f2.19411; f3.19496	0	2	0.4655	0	1	1	705.853	1410.7	3.25	0.00229	CID (Collision Induced Dissociation)	MS2	0	731.221	62.6388	6692	DG009795_Gallo_32.raw	0/0		3.33			0	0.02057
	FALSE	High	Sequest HT (A2)	A	Unambiguous	TDmGFGIADIVAKG	M3(Oxidation)	2	2	f2.19411; f3.19496	f2.19411; f3.19496	f2.19411; f3.19496	0	2	0.4674	0	1	1	705.853	1410.7	3.33	0.00235	CID (Collision Induced Dissociation)	MS2	0	735.262	62.1127	6638	DG009795_Gallo_32.raw	0/0		3.83			0	0.05665
	FALSE	High	Sequest HT (A2)	A	Unambiguous	TDmGFGIADIVAKG	M3(Oxidation)	2	2	f2.19411; f3.19496	f2.19411; f3.19496	f2.19411; f3.19496	0	2	0.5171	0	1	1	705.852	1410.7	2.21	0.00156	CID (Collision Induced Dissociation)	MS2	0	706.315	61.537	6581	DG009795_Gallo_32.raw	0/0		3.81	2.65495e+07	61.16	0	0.005581
	FALSE	High	Sequest HT (A2)	A	Unambiguous	TDmGFGIADIVAKG	M3(Oxidation)	2	2	f2.19411; f3.19496	f2.19411; f3.19496	f2.19411; f3.19496	0	2	0.4623	0	1	1	705.852	1410.7	2.56	0.0018	CID (Collision Induced Dissociation)	MS2	0	736.172	60.9932	6525	DG009795_Gallo_32.raw	0/0		3.98	2.65495e+07	61.16	0	0.001048
	FALSE	High	Sequest HT (A2)	A	Unambiguous	mGFGIADIVAKG	M1(Oxidation)	2	2	f2.19411; f3.19496	f2.19411; f3.19496	f2.19411; f3.19496	0	2	0.1509	0	1	1	597.814	1194.62	1.52	0.00091	CID (Collision Induced Dissociation)	MS2	0	989.76	60.7072	6496	DG009795_Gallo_32.raw	0/0		2.65			0	0.09286
	FALSE	High	Sequest HT (A2)	A	Unambiguous	TDmGFGIADIVAKG	M3(Oxidation)	2	2	f2.19411; f3.19496	f2.19411; f3.19496	f2.19411; f3.19496	0	2	0.3569	0	1	1	705.852	1410.7	1.86	0.00131	CID (Collision Induced Dissociation)	MS2	45.9256	647.02	64.9111	6950	DG009795_Gallo_32.raw	0/0		2.55	109560	64.74	0	0.04564
	FALSE	High	Sequest HT (A2)	A	Unambiguous	IKTTVEAGLNGEWTDmGFGIADIVAKG	M16(Oxidation)	2	2	f2.19411; f3.19496	f2.19411; f3.19496	f2.19411; f3.19496	0	3	0.4213	0	1	1	937.142	2809.41	1.31	0.00123	CID (Collision Induced Dissociation)	MS2	12.9911	143.188	76.2503	8530	DG009790_Gallo_30.raw	0/0		4.13	825020	76.43	0	0.005611
	FALSE	High	Sequest HT (A2)	A	Unambiguous	IKTTVEAGLNGEWTDmGFGIADIVAKG	M16(Oxidation)	2	2	f2.19411; f3.19496	f2.19411; f3.19496	f2.19411; f3.19496	0	3	0.5186	0	1	1	937.143	2809.41	2.16	0.00202	CID (Collision Induced Dissociation)	MS2	26.9631	485.397	75.6854	8424	DG009790_Gallo_30.raw	0/0		6.17	817964	75.8	0	0.0002388
	FALSE	High	Sequest HT (A2)	A	Unambiguous	IKTTVEAGLNGEWTDmGFGIADIVAKG	M16(Oxidation)	2	2	f2.19411; f3.19496	f2.19411; f3.19496	f2.19411; f3.19496	0	3	0.2764	0	1	1	937.143	2809.42	2.87	0.00269	CID (Collision Induced Dissociation)	MS2	22.451	583.029	77.5927	8775	DG009790_Gallo_30.raw	0/0		4.16	354465	77.74	0	0.002182
	FALSE	High	Sequest HT (A2)	A	Unambiguous	IKTTVEAGLNGEWTDmGFGIADIVAKG	M16(Oxidation)	2	2	f2.19411; f3.19496	f2.19411; f3.19496	f2.19411; f3.19496	0	3	0.5413	0	1	1	937.143	2809.41	2.55	0.00239	CID (Collision Induced Dissociation)	MS2	0	348.132	74.6035	8250	DG009790_Gallo_30.raw	0/0		6.3	478867	74.67	0	0.002109
	FALSE	High	Sequest HT (A2)	A	Unambiguous	AIKTTVEAGLNGEWTDmGFGIADIVAKG	M17(Oxidation)	2	2	f2.19411; f3.19496	f2.19411; f3.19496	f2.19411; f3.19496	0	3	0.5901	0	1	1	960.823	2880.45	3.23	0.0031	CID (Collision Induced Dissociation)	MS2	0	510.89	74.3648	8215	DG009790_Gallo_30.raw	0/0		5.44	1.00534e+06	74.36	0	0.002632
	FALSE	High	Sequest HT (A2)	A	Unambiguous	IKTTVEAGLNGEWTDmGFGIADIVAKG	M16(Oxidation)	2	2	f2.19411; f3.19496	f2.19411; f3.19496	f2.19411; f3.19496	0	3	0.5323	0	1	1	937.143	2809.42	2.61	0.00245	CID (Collision Induced Dissociation)	MS2	0	385.326	75.1476	8333	DG009790_Gallo_30.raw	0/0		6.03	521081	75.23	0	0.0005941
	FALSE	High	Sequest HT (A2)	A	Unambiguous	IKTTVEAGLNGE		3	3	f2.19411; f3.19496; f2.19392	f2.19411; f3.19496; f2.19392	f2.19411; f3.19496; f2.19392	0	2	0.2057	0	1	1	616.332	1231.66	3.09	0.0019	CID (Collision Induced Dissociation)	MS2	0	635.494	26.6574	2876	DG009795_Gallo_32.raw	0/0		2.82	180442	26.66	0	0.07165
	FALSE	High	Sequest HT (A2)	A	Unambiguous	TVEAGLNGEWTDmGFGIADIVAKG	M13(Oxidation)	2	2	f2.19411; f3.19496	f2.19411; f3.19496	f2.19411; f3.19496	0	2	0.4724	0	1	1	1234.1	2467.19	1.97	0.00244	CID (Collision Induced Dissociation)	MS2	0	173.064	78.6556	8953	DG009790_Gallo_30.raw	0/0		4.53			0	0.00794
	FALSE	High	Sequest HT (A2)	A	Selected	mADLINAIKTTVEAGLNGEWTDmGFG	M1(Oxidation); M23(Oxidation)	1	1	f2.19411	f2.19411	f2.19411	0	3	0.002	0	1	1	929.439	2786.3	0.88	0.00082	CID (Collision Induced Dissociation)	MS2	0	37.259	79.2249	8805	DG009795_Gallo_32.raw	0/0		4.96	28415472	79.18	0	0.01307
	FALSE	High	Sequest HT (A2)	A	Unambiguous	IKTTVEAGLNGEWTDmGFGIADIVAKG	M16(Oxidation)	2	2	f2.19411; f3.19496	f2.19411; f3.19496	f2.19411; f3.19496	0	3	0.3177	0	1	1	937.144	2809.42	3	0.00281	CID (Collision Induced Dissociation)	MS2	0	221.129	78.7568	8598	DG009795_Gallo_32.raw	0/0		3.84	1.27194e+06	78.7	0	0.1061
	FALSE	High	Sequest HT (A2)	A	Unambiguous	TDmGFGIADIVAKG	M3(Oxidation)	2	2	f2.19411; f3.19496	f2.19411; f3.19496	f2.19411; f3.19496	0	2	0.5016	0	1	1	705.852	1410.7	2.3	0.00162	CID (Collision Induced Dissociation)	MS2	0	1000	78.5516	8574	DG009795_Gallo_32.raw	0/0		3.11	207948	78.55	0	0.008524
	FALSE	High	Sequest HT (A2)	A	Unambiguous	TDmGFGIADIVAKG	M3(Oxidation)	2	2	f2.19411; f3.19496	f2.19411; f3.19496	f2.19411; f3.19496	0	2	0.5212	0	1	1	705.852	1410.7	2.56	0.0018	CID (Collision Induced Dissociation)	MS2	0	1000	61.0867	6616	DG009800_Gallo_36.raw	0/0		3.78	2.10736e+06	61.15	0	0.006439
	FALSE	High	Sequest HT (A2)	A	Unambiguous	mGFGIADIVAKG	M1(Oxidation)	2	2	f2.19411; f3.19496	f2.19411; f3.19496	f2.19411; f3.19496	0	2	0.2956	0	1	1	597.813	1194.62	0.8	0.00048	CID (Collision Induced Dissociation)	MS2	0	429.382	59.4001	6450	DG009800_Gallo_36.raw	0/0		3.18	384775	59.46	0	0.04132
	FALSE	High	Sequest HT (A2)	A	Unambiguous	FGIADIVAKG		2	2	f2.19411; f3.19496	f2.19411; f3.19496	f2.19411; f3.19496	0	2	0.1505	0	1	1	495.785	990.563	0.94	0.00047	CID (Collision Induced Dissociation)	MS2	18.0683	799.596	59.2547	6436	DG009800_Gallo_36.raw	0/0		2.06	297203	59.25	0	0.09264
	FALSE	High	Sequest HT (A2)	A	Unambiguous	IKTTVEAGLNGEWTDmGFGIADIVAKG	M16(Oxidation)	2	2	f2.19411; f3.19496	f2.19411; f3.19496	f2.19411; f3.19496	0	3	0.5548	0	1	1	937.144	2809.42	3.2	0.003	CID (Collision Induced Dissociation)	MS2	0	480.906	73.782	8013	DG009795_Gallo_32.raw	0/0		6.2	7.37963e+06	73.87	0	0.005097
	FALSE	High	Sequest HT (A2)	A	Unambiguous	TDMGFGIADIVAKG		2	2	f2.19411; f3.19496	f2.19411; f3.19496	f2.19411; f3.19496	0	2	0.4413	0	1	1	697.855	1394.7	2.79	0.00195	CID (Collision Induced Dissociation)	MS2	0	582.71	69.1709	7449	DG009795_Gallo_32.raw	0/0		3.58	327984	69.13	0	0.00915
	FALSE	High	Sequest HT (A2)	A	Unambiguous	EAGLNGEWTDmGFGIADIVAKG	M11(Oxidation)	2	2	f2.19411; f3.19496	f2.19411; f3.19496	f2.19411; f3.19496	0	2	0.466	0	1	1	1134.04	2267.07	1.45	0.00164	CID (Collision Induced Dissociation)	MS2	0	978.404	77.4779	8472	DG009795_Gallo_32.raw	0/0		3.24	583991	77.5	0	0.003845
	FALSE	High	Sequest HT (A2)	A	Unambiguous	IKTTVEAGLNGEWTDmGFGIADIVAKG	M16(Oxidation)	2	2	f2.19411; f3.19496	f2.19411; f3.19496	f2.19411; f3.19496	0	3	0.3513	0	1	1	937.144	2809.42	3.53	0.0033	CID (Collision Induced Dissociation)	MS2	0	734.092	74.336	8078	DG009795_Gallo_32.raw	0/0		5.01	108244	74.38	0	0.01009
	FALSE	High	Sequest HT (A2)	A	Unambiguous	IKTTVEAGLNGEWTDmGFGIADIVAKG	M16(Oxidation)	2	2	f2.19411; f3.19496	f2.19411; f3.19496	f2.19411; f3.19496	0	3	0.4786	0	1	1	937.144	2809.42	3.66	0.00342	CID (Collision Induced Dissociation)	MS2	0	1000	76.059	8287	DG009795_Gallo_32.raw	0/0		4.43	651194	76.14	0	0.01299
	FALSE	High	Sequest HT (A2)	A	Unambiguous	IKTTVEAGLNGEWTDmGFGIADIVAKG	M16(Oxidation)	2	2	f2.19411; f3.19496	f2.19411; f3.19496	f2.19411; f3.19496	0	3	0.3959	0	1	1	937.141	2809.41	0.01	1e-05	CID (Collision Induced Dissociation)	MS2	0	1000	75.3973	8211	DG009795_Gallo_32.raw	0/0		4.42	123910	75.33	0	0.0162
	FALSE	High	Sequest HT (A2)	A	Unambiguous	IKTTVEAGLNGEWTDmGFGIADIVAKG	M16(Oxidation)	2	2	f2.19411; f3.19496	f2.19411; f3.19496	f2.19411; f3.19496	0	3	0.1981	0	1	1	937.141	2809.41	0.2	0.00019	CID (Collision Induced Dissociation)	MS2	29.4792	732.841	74.8538	8146	DG009795_Gallo_32.raw	0/0		3.08	221780	74.82	0	0.02545
	FALSE	High	Sequest HT (A2)	A	Unambiguous	IKTTVEAGLNGEWTDmGFGIADIVAKG	M16(Oxidation)	2	2	f2.19411; f3.19496	f2.19411; f3.19496	f2.19411; f3.19496	0	3	0.5409	0	1	1	937.142	2809.41	1.05	0.00098	CID (Collision Induced Dissociation)	MS2	15.4656	439.353	73.5481	8095	DG009790_Gallo_30.raw	0/0		5.99	2.57705e+07	73.64	0	0.0001265
	FALSE	High	Sequest HT (A2)	A	Unambiguous	GFGIADIVAKG		2	2	f2.19411; f3.19496	f2.19411; f3.19496	f2.19411; f3.19496	0	2	0.2259	0	1	1	524.296	1047.58	0.68	0.00036	CID (Collision Induced Dissociation)	MS2	0	1000	58.464	6213	DG009790_Gallo_30.raw	0/0		3.01	982535	58.49	0	0.1064
	FALSE	High	Sequest HT (A2)	A	Unambiguous	IKTTVEAGLNGEWTDmGFGIADIVAKG	M16(Oxidation)	2	2	f2.19411; f3.19496	f2.19411; f3.19496	f2.19411; f3.19496	0	3	0.5206	0	1	1	937.118	2809.34	-24.17	-0.02264	CID (Collision Induced Dissociation)	MS2	100	487.47	73.5074	8089	DG009790_Gallo_30.raw	0/0		6.07			0	0.01412
	FALSE	High	Sequest HT (A2)	A	Unambiguous	mGFGIADIVAKG	M1(Oxidation)	2	2	f2.19411; f3.19496	f2.19411; f3.19496	f2.19411; f3.19496	0	2	0.3154	0	1	1	597.814	1194.62	1.72	0.00103	CID (Collision Induced Dissociation)	MS2	13.9032	418.94	59.4162	6322	DG009790_Gallo_30.raw	0/0		2.98	664200	59.42	0	0.06491
	FALSE	High	Sequest HT (A2)	A	Unambiguous	IKTTVEAGLNGE		3	3	f2.19411; f3.19496; f2.19392	f2.19411; f3.19496; f2.19392	f2.19411; f3.19496; f2.19392	0	2	0.327	0	1	1	616.331	1231.66	1.8	0.00111	CID (Collision Induced Dissociation)	MS2	0	588.092	26.7048	2848	DG009790_Gallo_30.raw	0/0		3.15	569085	26.74	0	0.02796
	FALSE	High	Sequest HT (A2)	A	Selected	mADLINAIKTTVEAG	M1(Oxidation)	1	1	f2.19411	f2.19411	f2.19411	0	2	0.0027	0	1	1	781.909	1562.81	1.29	0.00101	CID (Collision Induced Dissociation)	MS2	0	754.189	66.6862	7178	DG009790_Gallo_30.raw	0/0		3.71	2.52057e+06	66.77	0	0.002747
	FALSE	High	Sequest HT (A2)	A	Unambiguous	TDMGFGIADIVAKG		2	2	f2.19411; f3.19496	f2.19411; f3.19496	f2.19411; f3.19496	0	2	0.4718	0	1	1	697.855	1394.7	2.96	0.00207	CID (Collision Induced Dissociation)	MS2	0	767.951	69.1363	7495	DG009790_Gallo_30.raw	0/0		3.37			0	0.0383
	FALSE	High	Sequest HT (A2)	A	Unambiguous	MADLINAIKTTVEAG		1	1	f2.19411	f2.19411	f2.19411	0	2	0.342	0	1	1	773.914	1546.82	3.38	0.00262	CID (Collision Induced Dissociation)	MS2	0	814.517	73.1238	8040	DG009790_Gallo_30.raw	0/0		3.48	1.49246e+06	73.14	0	0.009815
	FALSE	High	Sequest HT (A2)	A	Unambiguous	TDmGFGIADIVAKG	M3(Oxidation)	2	2	f2.19411; f3.19496	f2.19411; f3.19496	f2.19411; f3.19496	0	2	0.4318	0	1	1	705.852	1410.7	2.56	0.0018	CID (Collision Induced Dissociation)	MS2	0	1000	61.0547	6497	DG009790_Gallo_30.raw	0/0		3.96	7.36177e+06	61.17	0	0.007717
	FALSE	High	Sequest HT (A2)	A	Unambiguous	TDmGFGIADIVAKG	M3(Oxidation)	2	2	f2.19411; f3.19496	f2.19411; f3.19496	f2.19411; f3.19496	0	2	0.3817	0	1	1	705.852	1410.7	2.64	0.00186	CID (Collision Induced Dissociation)	MS2	0	421.924	61.6066	6565	DG009790_Gallo_30.raw	0/0		2.62	7.36177e+06	61.17	0	0.02849
	FALSE	High	Sequest HT (A2)	A	Rejected	mADLINAIKTTVEAGLNGEWTDMGFG	M1(Oxidation)	1	1	f2.19411	f2.19411	f2.19411	0	3		0.003	2	2	924.107	2770.31	0.6	0.00055	CID (Collision Induced Dissociation)	MS2	0	44.33	79.3263	8898	DG009795_Gallo_32.raw	0/0		3.35	1.31658e+07	79.29	0.003364	0.1153
	FALSE	High	Sequest HT (A2)	A	Unambiguous	IVAKGIDVISGFFG		1	1	f2.19411	f2.19411	f2.19411	0	2	0.4729	0	1	1	711.905	1422.8	2.91	0.00207	CID (Collision Induced Dissociation)	MS2	0	483.399	78.2567	8546	DG009795_Gallo_32.raw	0/0		2.58	510565	78.28	0.003364	0.117
	FALSE	High	Sequest HT (A2)	A	Unambiguous	TDmGFGIADIVAKG	M3(Oxidation)	2	2	f2.19411; f3.19496	f2.19411; f3.19496	f2.19411; f3.19496	0	2	0.3232	0	1	1	705.853	1410.7	3.25	0.00229	CID (Collision Induced Dissociation)	MS2	0	325.338	63.1649	6752	DG009795_Gallo_32.raw	0/0		2.63	176952	63.02	0.003364	0.143
	FALSE	High	Sequest HT (A2)	A	Unambiguous	AIKTTVEAGLN		3	3	f2.19411; f3.19496; f2.19392	f2.19411; f3.19496; f2.19392	f2.19411; f3.19496; f2.19392	0	2	0.316	0	1	1	558.818	1116.63	2.07	0.00115	CID (Collision Induced Dissociation)	MS2	0	398.577	27.4325	2954	DG009795_Gallo_32.raw	0/0		2.88	362738	27.41	0.003364	0.1097
	FALSE	High	Sequest HT (A2)	A	Unambiguous	TDmGFGIADIVAKG	M3(Oxidation)	2	2	f2.19411; f3.19496	f2.19411; f3.19496	f2.19411; f3.19496	0	2	0.2483	0	1	1	705.852	1410.7	2.81	0.00199	CID (Collision Induced Dissociation)	MS2	0	732.613	67.675	7275	DG009795_Gallo_32.raw	0/0		2.86	117615	67.65	0.003364	0.1167
	FALSE	High	Sequest HT (A2)	A	Unambiguous	GFGIADIVAKG		2	2	f2.19411; f3.19496	f2.19411; f3.19496	f2.19411; f3.19496	0	2	0.2508	0	1	1	524.297	1047.59	2.31	0.00121	CID (Collision Induced Dissociation)	MS2	17.1991	661.757	58.3968	6240	DG009795_Gallo_32.raw	0/0		3.07	3.00061e+06	58.49	0.005932	0.1594
	FALSE	High	Sequest HT (A2)	A	Unambiguous	TDmGFGIADIVAKG	M3(Oxidation)	2	2	f2.19411; f3.19496	f2.19411; f3.19496	f2.19411; f3.19496	0	2	0.2933	0	1	1	705.853	1410.7	3.59	0.00253	CID (Collision Induced Dissociation)	MS2	0	602.395	66.3491	7119	DG009795_Gallo_32.raw	0/0		2.25	268862	65.99	0.005932	0.1995
FALSE	High	Master Protein	f2.19392	f2.19392	MSGLIDAIKTTVEAGLNGEWADMGLGIAEIVAKGIEAISGFFG	>f2.19392; >f3.19494	0	32.582	100	14	25	12	1	43	4.4	4.17	High	High	High	High	924924	3.73478e+07	2.29916e+07	1.7318e+06	80.73	14
	Checked	Confidence	Identifying Node	Search ID	PSM Ambiguity	Annotated Sequence	Modifications	# Protein Groups	# Proteins	Master Protein Accessions	Protein Accessions	Protein Descriptions	# Missed Cleavages	Charge	DeltaScore	DeltaCn	Rank	Search Engine Rank	m/z [Da]	MH+ [Da]	DeltaM [ppm]	Deltam/z [Da]	Activation Type	MS Order	Isolation Interference [%]	Ion Inject Time [ms]	RT [min]	First Scan	Spectrum File	Ions Matched	Annotation	XCorr	Area	Apex RT [min]	Percolator q-Value	Percolator PEP
	FALSE	High	Sequest HT (A2)	A	Unambiguous	mGLGIAEIVAKG	M1(Oxidation)	1	1	f2.19392	f2.19392	f2.19392	0	2	0.2302	0	1	1	587.83	1174.65	1.91	0.00112	CID (Collision Induced Dissociation)	MS2	18.7759	766.687	56.5396	6035	DG009795_Gallo_32.raw	0/0		2.52	957708	56.57	0	0.01446
	FALSE	High	Sequest HT (A2)	A	Unambiguous	ADmGLGIAEIVAKG	M3(Oxidation)	1	1	f2.19392	f2.19392	f2.19392	0	2	0.278	0	1	1	680.863	1360.72	2.84	0.00193	CID (Collision Induced Dissociation)	MS2	0	986.434	59.0212	6315	DG009795_Gallo_32.raw	0/0		3.13	6.974e+06	59.15	0	0.006976
	FALSE	High	Sequest HT (A2)	A	Unambiguous	ADmGLGIAEIVAKG	M3(Oxidation)	1	1	f2.19392	f2.19392	f2.19392	0	2	0.2602	0	1	1	680.862	1360.72	2.48	0.00169	CID (Collision Induced Dissociation)	MS2	0	646.542	59.542	6373	DG009795_Gallo_32.raw	0/0		2.69	6.974e+06	59.15	0	0.03219
	FALSE	High	Sequest HT (A2)	A	Unambiguous	mGLGIAEIVAKGIEA	M1(Oxidation)	1	1	f2.19392	f2.19392	f2.19392	0	2	0.2969	0	1	1	744.412	1487.82	1.46	0.00109	CID (Collision Induced Dissociation)	MS2	100	587.64	74.8392	8288	DG009790_Gallo_30.raw	0/0		2.93	873852	74.89	0	0.07042
	FALSE	High	Sequest HT (A2)	A	Unambiguous	ADmGLGIAEIVAKGIEA	M3(Oxidation)	1	1	f2.19392	f2.19392	f2.19392	0	2	0.42	0	1	1	837.445	1673.88	2.7	0.00226	CID (Collision Induced Dissociation)	MS2	20.5402	359.735	77.7259	8796	DG009790_Gallo_30.raw	0/0		3	2.33115e+06	77.73	0	0.005281
	FALSE	High	Sequest HT (A2)	A	Unambiguous	IDAIKTTVEAGLNGE		1	1	f2.19392	f2.19392	f2.19392	0	2	0.4908	0	1	1	765.907	1530.81	3.57	0.00273	CID (Collision Induced Dissociation)	MS2	19.3371	589.408	44.9594	4789	DG009795_Gallo_32.raw	0/0		3.81	647221	44.98	0	0.001427
	FALSE	High	Sequest HT (A2)	A	Unambiguous	IKTTVEAGLNGE		3	3	f2.19411; f3.19496; f2.19392	f2.19411; f3.19496; f2.19392	f2.19411; f3.19496; f2.19392	0	2	0.2057	0	1	1	616.332	1231.66	3.09	0.0019	CID (Collision Induced Dissociation)	MS2	0	635.494	26.6574	2876	DG009795_Gallo_32.raw	0/0		2.82	180442	26.66	0	0.07165
	FALSE	High	Sequest HT (A2)	A	Unambiguous	EAGLNGEWADMGLGIAEIVAKGIEA		1	1	f2.19392	f2.19392	f2.19392	0	2	0.3132	0	1	1	1257.63	2514.25	-1.27	-0.0016	CID (Collision Induced Dissociation)	MS2	6.40984	33.12	79.35	9124	DG009790_Gallo_30.raw	0/0		5.3	208763748	79.37	0	0.008027
	FALSE	High	Sequest HT (A2)	A	Unambiguous	mSGLIDAIKTTVEAGLNGEWADMGLGIAE	M1(Oxidation)	1	1	f2.19392	f2.19392	f2.19392	0	2	0.4863	0	1	1	1489.73	2978.45	0.32	0.00048	CID (Collision Induced Dissociation)	MS2	0	43.925	79.2762	8845	DG009795_Gallo_32.raw	0/0		5.1	2.10623e+07	79.23	0	0.07408
	FALSE	High	Sequest HT (A2)	A	Unambiguous	mSGLIDAIKTTVEAGLNGEWADMGLGIAE	M1(Oxidation)	1	1	f2.19392	f2.19392	f2.19392	0	3	0.4739	0	1	1	993.488	2978.45	0.65	0.00064	CID (Collision Induced Dissociation)	MS2	0	43.835	79.2697	8838	DG009795_Gallo_32.raw	0/0		6.14	74934602	79.23	0	0.0003173
	FALSE	High	Sequest HT (A2)	A	Unambiguous	mSGLIDAIKTTVEAGLNGEWADmGLGIAE	M1(Oxidation); M23(Oxidation)	1	1	f2.19392	f2.19392	f2.19392	0	3	0.1169	0	1	1	998.821	2994.45	1.16	0.00116	CID (Collision Induced Dissociation)	MS2	0	8.127	79.2216	8801	DG009795_Gallo_32.raw	0/0		2.31	204974896	79.17	0	0.01699
	FALSE	High	Sequest HT (A2)	A	Unambiguous	ADmGLGIAEIVAKGIEA	M3(Oxidation)	1	1	f2.19392	f2.19392	f2.19392	0	2	0.3824	0	1	1	837.444	1673.88	1.9	0.00159	CID (Collision Induced Dissociation)	MS2	24.1308	1000	77.7875	8503	DG009795_Gallo_32.raw	0/0		3.06	3.58171e+06	77.97	0	0.009087
	FALSE	High	Sequest HT (A2)	A	Unambiguous	IVAKGIEAISGFFG		1	1	f2.19392	f2.19392	f2.19392	0	2	0.2542	0	1	1	704.897	1408.79	2.61	0.00184	CID (Collision Induced Dissociation)	MS2	51.7365	1000	73.3576	7817	DG009800_Gallo_36.raw	0/0		2.36	1.7318e+06	73.46	0	0.009611
	FALSE	High	Sequest HT (A2)	A	Unambiguous	GLGIAEIVAKGIEA		1	1	f2.19392	f2.19392	f2.19392	0	2	0.3299	0	1	1	670.895	1340.78	3.08	0.00206	CID (Collision Induced Dissociation)	MS2	6.0737	175.949	73.7993	8132	DG009790_Gallo_30.raw	0/0		2.91	3.76634e+06	73.85	0	0.003146
	FALSE	High	Sequest HT (A2)	A	Unambiguous	IVAKGIEAISGFFG		1	1	f2.19392	f2.19392	f2.19392	0	2	0.2819	0	1	1	704.897	1408.79	2.09	0.00147	CID (Collision Induced Dissociation)	MS2	13.5691	237.111	73.2093	7938	DG009795_Gallo_32.raw	0/0		2.59	7.17176e+06	73.32	0	0.03051
	FALSE	High	Sequest HT (A2)	A	Unambiguous	LGIAEIVAKGIEA		1	1	f2.19392	f2.19392	f2.19392	0	2	0.2915	0	1	1	642.384	1283.76	2.82	0.00181	CID (Collision Induced Dissociation)	MS2	41.5914	1000	70.6131	7629	DG009795_Gallo_32.raw	0/0		2.23	174285	70.61	0	0.03689
	FALSE	High	Sequest HT (A2)	A	Unambiguous	mSGLIDAIKTTVEAGLN	M1(Oxidation)	1	1	f2.19392	f2.19392	f2.19392	0	2	0.4687	0	1	1	874.961	1748.91	2.35	0.00206	CID (Collision Induced Dissociation)	MS2	0	244.604	76.7806	8377	DG009795_Gallo_32.raw	0/0		4.31	4.29815e+06	76.86	0	0.00053
	FALSE	High	Sequest HT (A2)	A	Unambiguous	mGLGIAEIVAKGIEA	M1(Oxidation)	1	1	f2.19392	f2.19392	f2.19392	0	2	0.3218	0	1	1	744.413	1487.82	2.77	0.00206	CID (Collision Induced Dissociation)	MS2	0	582.853	74.9361	8155	DG009795_Gallo_32.raw	0/0		3.48	525574	74.91	0	0.00658
	FALSE	High	Sequest HT (A2)	A	Unambiguous	ADmGLGIAEIVAKG	M3(Oxidation)	1	1	f2.19392	f2.19392	f2.19392	0	2	0.2387	0	1	1	680.862	1360.72	2.66	0.00181	CID (Collision Induced Dissociation)	MS2	0	1000	59.1542	6288	DG009790_Gallo_30.raw	0/0		2.43	446907	59.19	0	0.01254
	FALSE	High	Sequest HT (A2)	A	Unambiguous	IVAKGIEAISGFFG		1	1	f2.19392	f2.19392	f2.19392	0	2	0.4517	0	1	1	704.897	1408.79	2.27	0.0016	CID (Collision Induced Dissociation)	MS2	0	985.304	73.4364	8355	DG009785_Gallo_26.raw	0/0		3.52	1.62003e+06	73.49	0	0.0135
	FALSE	High	Sequest HT (A2)	A	Unambiguous	IKTTVEAGLNGE		3	3	f2.19411; f3.19496; f2.19392	f2.19411; f3.19496; f2.19392	f2.19411; f3.19496; f2.19392	0	2	0.327	0	1	1	616.331	1231.66	1.8	0.00111	CID (Collision Induced Dissociation)	MS2	0	588.092	26.7048	2848	DG009790_Gallo_30.raw	0/0		3.15	569085	26.74	0	0.02796
	FALSE	High	Sequest HT (A2)	A	Unambiguous	IVAKGIEAISGFFG		1	1	f2.19392	f2.19392	f2.19392	0	2	0.3069	0	1	1	704.897	1408.79	2.53	0.00178	CID (Collision Induced Dissociation)	MS2	24.8882	295.47	73.1539	8044	DG009790_Gallo_30.raw	0/0		2.9	7.90493e+06	73.22	0	0.006404
	FALSE	High	Sequest HT (A2)	A	Unambiguous	AIKTTVEAGLN		3	3	f2.19411; f3.19496; f2.19392	f2.19411; f3.19496; f2.19392	f2.19411; f3.19496; f2.19392	0	2	0.316	0	1	1	558.818	1116.63	2.07	0.00115	CID (Collision Induced Dissociation)	MS2	0	398.577	27.4325	2954	DG009795_Gallo_32.raw	0/0		2.88	362738	27.41	0.003364	0.1097
	FALSE	High	Sequest HT (A2)	A	Unambiguous	GLGIAEIVAKG		1	1	f2.19392	f2.19392	f2.19392	0	2	0.2431	0	1	1	514.312	1027.62	1.47	0.00076	CID (Collision Induced Dissociation)	MS2	38.0152	738.506	55.0324	5877	DG009795_Gallo_32.raw	0/0		2.55	610476	55.06	0.003364	0.135
	FALSE	High	Sequest HT (A2)	A	Unambiguous	ADmGLGIAEIVAKG	M3(Oxidation)	1	1	f2.19392	f2.19392	f2.19392	0	2	0.2261	0	1	1	680.863	1360.72	3.38	0.0023	CID (Collision Induced Dissociation)	MS2	36.5779	1000	59.2248	6712	DG009785_Gallo_26.raw	0/0		2.61	229820	59.25	0.005932	0.1962
FALSE	High	Master Protein	f3.19496	f3.19496	RMSDLINAIKTTVEAGLNGEWTDMGFGIADIVAKGIDVILGFFG	>f3.19496; >f2.19394	0	31.312	97.7273	13	50	3	1	44	4.7	4.44	Not Found	High	High	Not Found		2.52057e+06	1.73717e+07		186.55	13
	Checked	Confidence	Identifying Node	Search ID	PSM Ambiguity	Annotated Sequence	Modifications	# Protein Groups	# Proteins	Master Protein Accessions	Protein Accessions	Protein Descriptions	# Missed Cleavages	Charge	DeltaScore	DeltaCn	Rank	Search Engine Rank	m/z [Da]	MH+ [Da]	DeltaM [ppm]	Deltam/z [Da]	Activation Type	MS Order	Isolation Interference [%]	Ion Inject Time [ms]	RT [min]	First Scan	Spectrum File	Ions Matched	Annotation	XCorr	Area	Apex RT [min]	Percolator q-Value	Percolator PEP
	FALSE	High	Sequest HT (A2)	A	Unambiguous	FGIADIVAKG		2	2	f2.19411; f3.19496	f2.19411; f3.19496	f2.19411; f3.19496	0	2	0.2565	0	1	1	495.786	990.564	2.18	0.00108	CID (Collision Induced Dissociation)	MS2	0	451.333	59.2339	6338	DG009795_Gallo_32.raw	0/0		2.69	1.05393e+06	59.22	0	0.06598
	FALSE	High	Sequest HT (A2)	A	Unambiguous	mGFGIADIVAKG	M1(Oxidation)	2	2	f2.19411; f3.19496	f2.19411; f3.19496	f2.19411; f3.19496	0	2	0.3426	0	1	1	597.814	1194.62	2.13	0.00127	CID (Collision Induced Dissociation)	MS2	22.2789	490.827	59.2872	6345	DG009795_Gallo_32.raw	0/0		3.59	3.61195e+06	59.45	0	0.009431
	FALSE	High	Sequest HT (A2)	A	Unambiguous	mGFGIADIVAKG	M1(Oxidation)	2	2	f2.19411; f3.19496	f2.19411; f3.19496	f2.19411; f3.19496	0	2	0.2222	0	1	1	597.815	1194.62	2.64	0.00158	CID (Collision Induced Dissociation)	MS2	0	584.721	59.838	6411	DG009795_Gallo_32.raw	0/0		3.06	3.61195e+06	59.45	0	0.07719
	FALSE	High	Sequest HT (A2)	A	Selected	MSDLINAIKTTVEAG		1	1	f3.19496	f3.19496	f3.19496	0	3	0.0163	0	1	1	521.608	1562.81	0.77	0.0004	HCD (High Energy Collision Dissociation)	MS2	0	660.59	66.8349	7184	DG009795_Gallo_32.raw	0/0		3.67	639239	66.8	0	0.02728
	FALSE	High	Sequest HT (A2)	A	Rejected	MSDLINAIKTTVEAG		1	1	f3.19496	f3.19496	f3.19496	0	2		0.0029	2	2	781.909	1562.81	0.35	0.00027	CID (Collision Induced Dissociation)	MS2	38.3755	266.298	66.6778	7166	DG009795_Gallo_32.raw	0/0		3.45	4.17229e+06	66.8	0	0.00545
	FALSE	High	Sequest HT (A2)	A	Unambiguous	TDmGFGIADIVAKG	M3(Oxidation)	2	2	f2.19411; f3.19496	f2.19411; f3.19496	f2.19411; f3.19496	0	2	0.3274	0	1	1	705.852	1410.7	2.64	0.00186	CID (Collision Induced Dissociation)	MS2	0	1000	64.2892	6883	DG009795_Gallo_32.raw	0/0		2.81	113431	64.37	0	0.01558
	FALSE	High	Sequest HT (A2)	A	Unambiguous	TDmGFGIADIVAKG	M3(Oxidation)	2	2	f2.19411; f3.19496	f2.19411; f3.19496	f2.19411; f3.19496	0	2	0.4655	0	1	1	705.853	1410.7	3.25	0.00229	CID (Collision Induced Dissociation)	MS2	0	731.221	62.6388	6692	DG009795_Gallo_32.raw	0/0		3.33			0	0.02057
	FALSE	High	Sequest HT (A2)	A	Unambiguous	TDmGFGIADIVAKG	M3(Oxidation)	2	2	f2.19411; f3.19496	f2.19411; f3.19496	f2.19411; f3.19496	0	2	0.4674	0	1	1	705.853	1410.7	3.33	0.00235	CID (Collision Induced Dissociation)	MS2	0	735.262	62.1127	6638	DG009795_Gallo_32.raw	0/0		3.83			0	0.05665
	FALSE	High	Sequest HT (A2)	A	Unambiguous	TDmGFGIADIVAKG	M3(Oxidation)	2	2	f2.19411; f3.19496	f2.19411; f3.19496	f2.19411; f3.19496	0	2	0.5171	0	1	1	705.852	1410.7	2.21	0.00156	CID (Collision Induced Dissociation)	MS2	0	706.315	61.537	6581	DG009795_Gallo_32.raw	0/0		3.81	2.65495e+07	61.16	0	0.005581
	FALSE	High	Sequest HT (A2)	A	Unambiguous	TDmGFGIADIVAKG	M3(Oxidation)	2	2	f2.19411; f3.19496	f2.19411; f3.19496	f2.19411; f3.19496	0	2	0.4623	0	1	1	705.852	1410.7	2.56	0.0018	CID (Collision Induced Dissociation)	MS2	0	736.172	60.9932	6525	DG009795_Gallo_32.raw	0/0		3.98	2.65495e+07	61.16	0	0.001048
	FALSE	High	Sequest HT (A2)	A	Unambiguous	mGFGIADIVAKG	M1(Oxidation)	2	2	f2.19411; f3.19496	f2.19411; f3.19496	f2.19411; f3.19496	0	2	0.1509	0	1	1	597.814	1194.62	1.52	0.00091	CID (Collision Induced Dissociation)	MS2	0	989.76	60.7072	6496	DG009795_Gallo_32.raw	0/0		2.65			0	0.09286
	FALSE	High	Sequest HT (A2)	A	Unambiguous	TDmGFGIADIVAKG	M3(Oxidation)	2	2	f2.19411; f3.19496	f2.19411; f3.19496	f2.19411; f3.19496	0	2	0.3569	0	1	1	705.852	1410.7	1.86	0.00131	CID (Collision Induced Dissociation)	MS2	45.9256	647.02	64.9111	6950	DG009795_Gallo_32.raw	0/0		2.55	109560	64.74	0	0.04564
	FALSE	High	Sequest HT (A2)	A	Unambiguous	IKTTVEAGLNGEWTDmGFGIADIVAKG	M16(Oxidation)	2	2	f2.19411; f3.19496	f2.19411; f3.19496	f2.19411; f3.19496	0	3	0.4213	0	1	1	937.142	2809.41	1.31	0.00123	CID (Collision Induced Dissociation)	MS2	12.9911	143.188	76.2503	8530	DG009790_Gallo_30.raw	0/0		4.13	825020	76.43	0	0.005611
	FALSE	High	Sequest HT (A2)	A	Unambiguous	IKTTVEAGLNGEWTDmGFGIADIVAKG	M16(Oxidation)	2	2	f2.19411; f3.19496	f2.19411; f3.19496	f2.19411; f3.19496	0	3	0.5186	0	1	1	937.143	2809.41	2.16	0.00202	CID (Collision Induced Dissociation)	MS2	26.9631	485.397	75.6854	8424	DG009790_Gallo_30.raw	0/0		6.17	817964	75.8	0	0.0002388
	FALSE	High	Sequest HT (A2)	A	Unambiguous	IKTTVEAGLNGEWTDmGFGIADIVAKG	M16(Oxidation)	2	2	f2.19411; f3.19496	f2.19411; f3.19496	f2.19411; f3.19496	0	3	0.2764	0	1	1	937.143	2809.42	2.87	0.00269	CID (Collision Induced Dissociation)	MS2	22.451	583.029	77.5927	8775	DG009790_Gallo_30.raw	0/0		4.16	354465	77.74	0	0.002182
	FALSE	High	Sequest HT (A2)	A	Unambiguous	IKTTVEAGLNGEWTDmGFGIADIVAKG	M16(Oxidation)	2	2	f2.19411; f3.19496	f2.19411; f3.19496	f2.19411; f3.19496	0	3	0.5413	0	1	1	937.143	2809.41	2.55	0.00239	CID (Collision Induced Dissociation)	MS2	0	348.132	74.6035	8250	DG009790_Gallo_30.raw	0/0		6.3	478867	74.67	0	0.002109
	FALSE	High	Sequest HT (A2)	A	Unambiguous	AIKTTVEAGLNGEWTDmGFGIADIVAKG	M17(Oxidation)	2	2	f2.19411; f3.19496	f2.19411; f3.19496	f2.19411; f3.19496	0	3	0.5901	0	1	1	960.823	2880.45	3.23	0.0031	CID (Collision Induced Dissociation)	MS2	0	510.89	74.3648	8215	DG009790_Gallo_30.raw	0/0		5.44	1.00534e+06	74.36	0	0.002632
	FALSE	High	Sequest HT (A2)	A	Unambiguous	IKTTVEAGLNGEWTDmGFGIADIVAKG	M16(Oxidation)	2	2	f2.19411; f3.19496	f2.19411; f3.19496	f2.19411; f3.19496	0	3	0.5323	0	1	1	937.143	2809.42	2.61	0.00245	CID (Collision Induced Dissociation)	MS2	0	385.326	75.1476	8333	DG009790_Gallo_30.raw	0/0		6.03	521081	75.23	0	0.0005941
	FALSE	High	Sequest HT (A2)	A	Unambiguous	IKTTVEAGLNGE		3	3	f2.19411; f3.19496; f2.19392	f2.19411; f3.19496; f2.19392	f2.19411; f3.19496; f2.19392	0	2	0.2057	0	1	1	616.332	1231.66	3.09	0.0019	CID (Collision Induced Dissociation)	MS2	0	635.494	26.6574	2876	DG009795_Gallo_32.raw	0/0		2.82	180442	26.66	0	0.07165
	FALSE	High	Sequest HT (A2)	A	Unambiguous	TVEAGLNGEWTDmGFGIADIVAKG	M13(Oxidation)	2	2	f2.19411; f3.19496	f2.19411; f3.19496	f2.19411; f3.19496	0	2	0.4724	0	1	1	1234.1	2467.19	1.97	0.00244	CID (Collision Induced Dissociation)	MS2	0	173.064	78.6556	8953	DG009790_Gallo_30.raw	0/0		4.53			0	0.00794
	FALSE	High	Sequest HT (A2)	A	Rejected	MSDLINAIKTTVEAGLNGEWTDmGFG	M23(Oxidation)	1	1	f3.19496	f3.19496	f3.19496	0	3		0.002	2	2	929.439	2786.3	0.88	0.00082	CID (Collision Induced Dissociation)	MS2	0	37.259	79.2249	8805	DG009795_Gallo_32.raw	0/0		4.95	28415472	79.18	0	0.0131
	FALSE	High	Sequest HT (A2)	A	Unambiguous	DIVAKGIDVILGFFG		1	1	f3.19496	f3.19496	f3.19496	0	2	0.3086	0	1	1	782.445	1563.88	2.88	0.00225	CID (Collision Induced Dissociation)	MS2	0	43.835	79.5125	9109	DG009795_Gallo_32.raw	0/0		2.43	1.95273e+07	79.45	0	0.02439
	FALSE	High	Sequest HT (A2)	A	Unambiguous	IKTTVEAGLNGEWTDmGFGIADIVAKG	M16(Oxidation)	2	2	f2.19411; f3.19496	f2.19411; f3.19496	f2.19411; f3.19496	0	3	0.3177	0	1	1	937.144	2809.42	3	0.00281	CID (Collision Induced Dissociation)	MS2	0	221.129	78.7568	8598	DG009795_Gallo_32.raw	0/0		3.84	1.27194e+06	78.7	0	0.1061
	FALSE	High	Sequest HT (A2)	A	Unambiguous	TDmGFGIADIVAKG	M3(Oxidation)	2	2	f2.19411; f3.19496	f2.19411; f3.19496	f2.19411; f3.19496	0	2	0.5016	0	1	1	705.852	1410.7	2.3	0.00162	CID (Collision Induced Dissociation)	MS2	0	1000	78.5516	8574	DG009795_Gallo_32.raw	0/0		3.11	207948	78.55	0	0.008524
	FALSE	High	Sequest HT (A2)	A	Unambiguous	TDmGFGIADIVAKG	M3(Oxidation)	2	2	f2.19411; f3.19496	f2.19411; f3.19496	f2.19411; f3.19496	0	2	0.5212	0	1	1	705.852	1410.7	2.56	0.0018	CID (Collision Induced Dissociation)	MS2	0	1000	61.0867	6616	DG009800_Gallo_36.raw	0/0		3.78	2.10736e+06	61.15	0	0.006439
	FALSE	High	Sequest HT (A2)	A	Unambiguous	mGFGIADIVAKG	M1(Oxidation)	2	2	f2.19411; f3.19496	f2.19411; f3.19496	f2.19411; f3.19496	0	2	0.2956	0	1	1	597.813	1194.62	0.8	0.00048	CID (Collision Induced Dissociation)	MS2	0	429.382	59.4001	6450	DG009800_Gallo_36.raw	0/0		3.18	384775	59.46	0	0.04132
	FALSE	High	Sequest HT (A2)	A	Unambiguous	FGIADIVAKG		2	2	f2.19411; f3.19496	f2.19411; f3.19496	f2.19411; f3.19496	0	2	0.1505	0	1	1	495.785	990.563	0.94	0.00047	CID (Collision Induced Dissociation)	MS2	18.0683	799.596	59.2547	6436	DG009800_Gallo_36.raw	0/0		2.06	297203	59.25	0	0.09264
	FALSE	High	Sequest HT (A2)	A	Unambiguous	IKTTVEAGLNGEWTDmGFGIADIVAKG	M16(Oxidation)	2	2	f2.19411; f3.19496	f2.19411; f3.19496	f2.19411; f3.19496	0	3	0.5548	0	1	1	937.144	2809.42	3.2	0.003	CID (Collision Induced Dissociation)	MS2	0	480.906	73.782	8013	DG009795_Gallo_32.raw	0/0		6.2	7.37963e+06	73.87	0	0.005097
	FALSE	High	Sequest HT (A2)	A	Unambiguous	TDMGFGIADIVAKG		2	2	f2.19411; f3.19496	f2.19411; f3.19496	f2.19411; f3.19496	0	2	0.4413	0	1	1	697.855	1394.7	2.79	0.00195	CID (Collision Induced Dissociation)	MS2	0	582.71	69.1709	7449	DG009795_Gallo_32.raw	0/0		3.58	327984	69.13	0	0.00915
	FALSE	High	Sequest HT (A2)	A	Unambiguous	EAGLNGEWTDmGFGIADIVAKG	M11(Oxidation)	2	2	f2.19411; f3.19496	f2.19411; f3.19496	f2.19411; f3.19496	0	2	0.466	0	1	1	1134.04	2267.07	1.45	0.00164	CID (Collision Induced Dissociation)	MS2	0	978.404	77.4779	8472	DG009795_Gallo_32.raw	0/0		3.24	583991	77.5	0	0.003845
	FALSE	High	Sequest HT (A2)	A	Unambiguous	IKTTVEAGLNGEWTDmGFGIADIVAKG	M16(Oxidation)	2	2	f2.19411; f3.19496	f2.19411; f3.19496	f2.19411; f3.19496	0	3	0.3513	0	1	1	937.144	2809.42	3.53	0.0033	CID (Collision Induced Dissociation)	MS2	0	734.092	74.336	8078	DG009795_Gallo_32.raw	0/0		5.01	108244	74.38	0	0.01009
	FALSE	High	Sequest HT (A2)	A	Unambiguous	IKTTVEAGLNGEWTDmGFGIADIVAKG	M16(Oxidation)	2	2	f2.19411; f3.19496	f2.19411; f3.19496	f2.19411; f3.19496	0	3	0.4786	0	1	1	937.144	2809.42	3.66	0.00342	CID (Collision Induced Dissociation)	MS2	0	1000	76.059	8287	DG009795_Gallo_32.raw	0/0		4.43	651194	76.14	0	0.01299
	FALSE	High	Sequest HT (A2)	A	Unambiguous	IKTTVEAGLNGEWTDmGFGIADIVAKG	M16(Oxidation)	2	2	f2.19411; f3.19496	f2.19411; f3.19496	f2.19411; f3.19496	0	3	0.3959	0	1	1	937.141	2809.41	0.01	1e-05	CID (Collision Induced Dissociation)	MS2	0	1000	75.3973	8211	DG009795_Gallo_32.raw	0/0		4.42	123910	75.33	0	0.0162
	FALSE	High	Sequest HT (A2)	A	Unambiguous	IKTTVEAGLNGEWTDmGFGIADIVAKG	M16(Oxidation)	2	2	f2.19411; f3.19496	f2.19411; f3.19496	f2.19411; f3.19496	0	3	0.1981	0	1	1	937.141	2809.41	0.2	0.00019	CID (Collision Induced Dissociation)	MS2	29.4792	732.841	74.8538	8146	DG009795_Gallo_32.raw	0/0		3.08	221780	74.82	0	0.02545
	FALSE	High	Sequest HT (A2)	A	Unambiguous	IKTTVEAGLNGEWTDmGFGIADIVAKG	M16(Oxidation)	2	2	f2.19411; f3.19496	f2.19411; f3.19496	f2.19411; f3.19496	0	3	0.5409	0	1	1	937.142	2809.41	1.05	0.00098	CID (Collision Induced Dissociation)	MS2	15.4656	439.353	73.5481	8095	DG009790_Gallo_30.raw	0/0		5.99	2.57705e+07	73.64	0	0.0001265
	FALSE	High	Sequest HT (A2)	A	Unambiguous	GFGIADIVAKG		2	2	f2.19411; f3.19496	f2.19411; f3.19496	f2.19411; f3.19496	0	2	0.2259	0	1	1	524.296	1047.58	0.68	0.00036	CID (Collision Induced Dissociation)	MS2	0	1000	58.464	6213	DG009790_Gallo_30.raw	0/0		3.01	982535	58.49	0	0.1064
	FALSE	High	Sequest HT (A2)	A	Unambiguous	IKTTVEAGLNGEWTDmGFGIADIVAKG	M16(Oxidation)	2	2	f2.19411; f3.19496	f2.19411; f3.19496	f2.19411; f3.19496	0	3	0.5206	0	1	1	937.118	2809.34	-24.17	-0.02264	CID (Collision Induced Dissociation)	MS2	100	487.47	73.5074	8089	DG009790_Gallo_30.raw	0/0		6.07			0	0.01412
	FALSE	High	Sequest HT (A2)	A	Unambiguous	mGFGIADIVAKG	M1(Oxidation)	2	2	f2.19411; f3.19496	f2.19411; f3.19496	f2.19411; f3.19496	0	2	0.3154	0	1	1	597.814	1194.62	1.72	0.00103	CID (Collision Induced Dissociation)	MS2	13.9032	418.94	59.4162	6322	DG009790_Gallo_30.raw	0/0		2.98	664200	59.42	0	0.06491
	FALSE	High	Sequest HT (A2)	A	Unambiguous	IKTTVEAGLNGE		3	3	f2.19411; f3.19496; f2.19392	f2.19411; f3.19496; f2.19392	f2.19411; f3.19496; f2.19392	0	2	0.327	0	1	1	616.331	1231.66	1.8	0.00111	CID (Collision Induced Dissociation)	MS2	0	588.092	26.7048	2848	DG009790_Gallo_30.raw	0/0		3.15	569085	26.74	0	0.02796
	FALSE	High	Sequest HT (A2)	A	Rejected	MSDLINAIKTTVEAG		1	1	f3.19496	f3.19496	f3.19496	0	2		0.0027	2	2	781.909	1562.81	1.29	0.00101	CID (Collision Induced Dissociation)	MS2	0	754.189	66.6862	7178	DG009790_Gallo_30.raw	0/0		3.7	2.52057e+06	66.77	0	0.002451
	FALSE	High	Sequest HT (A2)	A	Unambiguous	TDMGFGIADIVAKG		2	2	f2.19411; f3.19496	f2.19411; f3.19496	f2.19411; f3.19496	0	2	0.4718	0	1	1	697.855	1394.7	2.96	0.00207	CID (Collision Induced Dissociation)	MS2	0	767.951	69.1363	7495	DG009790_Gallo_30.raw	0/0		3.37			0	0.0383
	FALSE	High	Sequest HT (A2)	A	Unambiguous	TDmGFGIADIVAKG	M3(Oxidation)	2	2	f2.19411; f3.19496	f2.19411; f3.19496	f2.19411; f3.19496	0	2	0.4318	0	1	1	705.852	1410.7	2.56	0.0018	CID (Collision Induced Dissociation)	MS2	0	1000	61.0547	6497	DG009790_Gallo_30.raw	0/0		3.96	7.36177e+06	61.17	0	0.007717
	FALSE	High	Sequest HT (A2)	A	Unambiguous	TDmGFGIADIVAKG	M3(Oxidation)	2	2	f2.19411; f3.19496	f2.19411; f3.19496	f2.19411; f3.19496	0	2	0.3817	0	1	1	705.852	1410.7	2.64	0.00186	CID (Collision Induced Dissociation)	MS2	0	421.924	61.6066	6565	DG009790_Gallo_30.raw	0/0		2.62	7.36177e+06	61.17	0	0.02849
	FALSE	High	Sequest HT (A2)	A	Selected	MSDLINAIKTTVEAGLNGEWTDMGFG		1	1	f3.19496	f3.19496	f3.19496	0	3	0.003	0	1	1	924.107	2770.31	0.6	0.00055	CID (Collision Induced Dissociation)	MS2	0	44.33	79.3263	8898	DG009795_Gallo_32.raw	0/0		3.36	1.31658e+07	79.29	0.003364	0.1153
	FALSE	High	Sequest HT (A2)	A	Unambiguous	DIVAKGIDVILGFFG		1	1	f3.19496	f3.19496	f3.19496	0	2	0.1538	0	1	1	782.445	1563.88	3.27	0.00256	CID (Collision Induced Dissociation)	MS2	100	694.073	82.1235	9734	DG009795_Gallo_32.raw	0/0		2.34	379185	82.11	0.003364	0.1396
	FALSE	High	Sequest HT (A2)	A	Unambiguous	TDmGFGIADIVAKG	M3(Oxidation)	2	2	f2.19411; f3.19496	f2.19411; f3.19496	f2.19411; f3.19496	0	2	0.3232	0	1	1	705.853	1410.7	3.25	0.00229	CID (Collision Induced Dissociation)	MS2	0	325.338	63.1649	6752	DG009795_Gallo_32.raw	0/0		2.63	176952	63.02	0.003364	0.143
	FALSE	High	Sequest HT (A2)	A	Unambiguous	AIKTTVEAGLN		3	3	f2.19411; f3.19496; f2.19392	f2.19411; f3.19496; f2.19392	f2.19411; f3.19496; f2.19392	0	2	0.316	0	1	1	558.818	1116.63	2.07	0.00115	CID (Collision Induced Dissociation)	MS2	0	398.577	27.4325	2954	DG009795_Gallo_32.raw	0/0		2.88	362738	27.41	0.003364	0.1097
	FALSE	High	Sequest HT (A2)	A	Unambiguous	TDmGFGIADIVAKG	M3(Oxidation)	2	2	f2.19411; f3.19496	f2.19411; f3.19496	f2.19411; f3.19496	0	2	0.2483	0	1	1	705.852	1410.7	2.81	0.00199	CID (Collision Induced Dissociation)	MS2	0	732.613	67.675	7275	DG009795_Gallo_32.raw	0/0		2.86	117615	67.65	0.003364	0.1167
	FALSE	High	Sequest HT (A2)	A	Unambiguous	GFGIADIVAKG		2	2	f2.19411; f3.19496	f2.19411; f3.19496	f2.19411; f3.19496	0	2	0.2508	0	1	1	524.297	1047.59	2.31	0.00121	CID (Collision Induced Dissociation)	MS2	17.1991	661.757	58.3968	6240	DG009795_Gallo_32.raw	0/0		3.07	3.00061e+06	58.49	0.005932	0.1594
	FALSE	High	Sequest HT (A2)	A	Unambiguous	TDmGFGIADIVAKG	M3(Oxidation)	2	2	f2.19411; f3.19496	f2.19411; f3.19496	f2.19411; f3.19496	0	2	0.2933	0	1	1	705.853	1410.7	3.59	0.00253	CID (Collision Induced Dissociation)	MS2	0	602.395	66.3491	7119	DG009795_Gallo_32.raw	0/0		2.25	268862	65.99	0.005932	0.1995
FALSE	High	Master Protein	r3.14267	r3.14267	NVMSKLTRVIVTSIMTVGFLTATLGLTAGNADAKLEGNGTLSQKQYQRLASQQF	>r3.14267	0	31.012	70.3704	13	35	13	1	54	5.8	9.99	High	High	High	High	652376	5.87491e+06	1.5585e+07	890926	103.13	13
	Checked	Confidence	Identifying Node	Search ID	PSM Ambiguity	Annotated Sequence	Modifications	# Protein Groups	# Proteins	Master Protein Accessions	Protein Accessions	Protein Descriptions	# Missed Cleavages	Charge	DeltaScore	DeltaCn	Rank	Search Engine Rank	m/z [Da]	MH+ [Da]	DeltaM [ppm]	Deltam/z [Da]	Activation Type	MS Order	Isolation Interference [%]	Ion Inject Time [ms]	RT [min]	First Scan	Spectrum File	Ions Matched	Annotation	XCorr	Area	Apex RT [min]	Percolator q-Value	Percolator PEP
	FALSE	High	Sequest HT (A2)	A	Unambiguous	TATLGLTAGNADAKLEGNGTLSQKQYQRLASQQF		1	1	r3.14267	r3.14267	r3.14267	0	4	0.1315	0	1	1	895.967	3580.85	3.39	0.00304	CID (Collision Induced Dissociation)	MS2	0	203.587	52.2283	5582	DG009795_Gallo_32.raw	0/0		2.13	8.03418e+06	52.24	0	0.03475
	FALSE	High	Sequest HT (A2)	A	Unambiguous	TATLGLTAGNADAKLEGNGTLSQKQYQRLASQQF		1	1	r3.14267	r3.14267	r3.14267	0	3	0.2768	0	1	1	1194.29	3580.85	4.71	0.00562	CID (Collision Induced Dissociation)	MS2	0	544.564	52.2504	5584	DG009795_Gallo_32.raw	0/0		2.89			0	0.01487
	FALSE	High	Sequest HT (A2)	A	Unambiguous	LTATLGLTAGNADA		1	2	r3.14267	r3.14267; r1.27087	r3.14267; r1.27087	0	2	0.4084	0	1	1	644.843	1288.68	2.97	0.00191	CID (Collision Induced Dissociation)	MS2	0	857.977	52.401	5602	DG009795_Gallo_32.raw	0/0		3.82	2.92321e+06	52.52	0	0.005168
	FALSE	High	Sequest HT (A2)	A	Unambiguous	LTATLGLTAGNADAKLEGNGTLSQKQYQRLASQQF		1	1	r3.14267	r3.14267	r3.14267	0	4	0.3993	0	1	1	924.237	3693.93	1.94	0.0018	CID (Collision Induced Dissociation)	MS2	0	395.033	56.2893	6010	DG009795_Gallo_32.raw	0/0		2.98	7.86871e+06	56.3	0	0.01946
	FALSE	High	Sequest HT (A2)	A	Selected	VGFLTATLGLTAGNADAKLEGNGTLSQKQYQRL		1	2	r3.14267	r3.14267; r1.27087	r3.14267; r1.27087	0	4	0.0156	0	1	1	859.714	3435.83	3.29	0.00283	CID (Collision Induced Dissociation)	MS2	0	445.052	66.425	7133	DG009795_Gallo_32.raw	0/0		2.57	3.38839e+06	66.46	0	0.0294
	FALSE	High	Sequest HT (A2)	A	Unambiguous	ATLGLTAGNADAKLEGNGTLSQKQYQRLASQQF		1	1	r3.14267	r3.14267	r3.14267	0	4	0.3614	0	1	1	870.706	3479.8	3.58	0.00311	CID (Collision Induced Dissociation)	MS2	0	495.789	51.4883	5502	DG009795_Gallo_32.raw	0/0		4.04	2.03828e+06	51.53	0	0.02846
	FALSE	High	Sequest HT (A2)	A	Unambiguous	GFLTATLGLTAGNADA		1	2	r3.14267	r3.14267; r1.27087	r3.14267; r1.27087	0	2	0.4332	0	1	1	746.887	1492.77	1.81	0.00135	CID (Collision Induced Dissociation)	MS2	0	341.113	75.6967	8426	DG009790_Gallo_30.raw	0/0		3.74	2.9256e+06	75.77	0	0.006974
	FALSE	High	Sequest HT (A2)	A	Unambiguous	GFLTATLGLTAGN		1	2	r3.14267	r3.14267; r1.27087	r3.14267; r1.27087	0	2	0.4155	0	1	1	618.337	1235.67	2.26	0.0014	CID (Collision Induced Dissociation)	MS2	27.2717	251.683	75.0926	8323	DG009790_Gallo_30.raw	0/0		3.61	1.61479e+07	75.22	0	0.004558
	FALSE	High	Sequest HT (A2)	A	Unambiguous	FLTATLGLTAGN		1	2	r3.14267	r3.14267; r1.27087	r3.14267; r1.27087	0	2	0.3401	0	1	1	589.826	1178.64	1.94	0.00114	CID (Collision Induced Dissociation)	MS2	0	299.148	67.0575	7213	DG009795_Gallo_32.raw	0/0		2.97	4.28603e+06	67.12	0	0.01161
	FALSE	High	Sequest HT (A2)	A	Unambiguous	FLTATLGLTAGNADA		1	2	r3.14267	r3.14267; r1.27087	r3.14267; r1.27087	0	2	0.4514	0	1	1	718.377	1435.75	2.2	0.00158	CID (Collision Induced Dissociation)	MS2	0	363.742	68.0456	7326	DG009795_Gallo_32.raw	0/0		3.81	736268	68.05	0	0.006657
	FALSE	High	Sequest HT (A2)	A	Unambiguous	GFLTATLGLTAGN		1	2	r3.14267	r3.14267; r1.27087	r3.14267; r1.27087	0	2	0.3841	0	1	1	618.336	1235.66	0.78	0.00048	CID (Collision Induced Dissociation)	MS2	0	987.846	75.3431	8003	DG009800_Gallo_36.raw	0/0		3.28	451899	75.36	0	0.0148
	FALSE	High	Sequest HT (A2)	A	Unambiguous	FLTATLGLTAGN		1	2	r3.14267	r3.14267; r1.27087	r3.14267; r1.27087	0	2	0.297	0	1	1	589.825	1178.64	1.21	0.00071	CID (Collision Induced Dissociation)	MS2	0	1000	67.2369	7226	DG009800_Gallo_36.raw	0/0		2.66	706123	67.15	0	0.03832
	FALSE	High	Sequest HT (A2)	A	Unambiguous	LTATLGLTAGNADA		1	2	r3.14267	r3.14267; r1.27087	r3.14267; r1.27087	0	2	0.4081	0	1	1	644.842	1288.68	2.21	0.00143	CID (Collision Induced Dissociation)	MS2	0	923.135	52.439	5744	DG009800_Gallo_36.raw	0/0		3.21	1.65982e+06	52.55	0	0.004924
	FALSE	High	Sequest HT (A2)	A	Selected	TATLGLTAGNADAKLEGNGTLSQKQYQRLASQQF		1	1	r3.14267	r3.14267	r3.14267	0	4	0.0389	0	1	1	895.968	3580.85	4.07	0.00365	CID (Collision Induced Dissociation)	MS2	0	988.362	52.2332	5724	DG009800_Gallo_36.raw	0/0		2.83	628780	52.14	0	0.05642
	FALSE	High	Sequest HT (A2)	A	Unambiguous	LTATLGLTAGN		1	2	r3.14267	r3.14267; r1.27087	r3.14267; r1.27087	0	2	0.2868	0	1	1	516.291	1031.57	0.84	0.00044	CID (Collision Induced Dissociation)	MS2	39.9001	400.922	50.1593	5500	DG009800_Gallo_36.raw	0/0		2.58	1.00801e+06	50.21	0	0.08927
	FALSE	High	Sequest HT (A2)	A	Unambiguous	VGFLTATLGLTAGNADAKLEGNGTLSQKQYQRLASQQF		1	1	r3.14267	r3.14267	r3.14267	0	4	0.1705	0	1	1	1000.03	3997.09	2.51	0.00251	CID (Collision Induced Dissociation)	MS2	0	153.141	69.9639	7546	DG009795_Gallo_32.raw	0/0		2.58	1.05272e+08	70.03	0	0.08039
	FALSE	High	Sequest HT (A2)	A	Unambiguous	GFLTATLGLTAGN		1	2	r3.14267	r3.14267; r1.27087	r3.14267; r1.27087	0	2	0.1186	0	1	1	618.335	1235.66	0.18	0.00011	CID (Collision Induced Dissociation)	MS2	30.1192	788.681	75.6685	8238	DG009795_Gallo_32.raw	0/0		2.36	99260.9	75.61	0	0.0468
	FALSE	High	Sequest HT (A2)	A	Unambiguous	GFLTATLGLTAGN		1	2	r3.14267	r3.14267; r1.27087	r3.14267; r1.27087	0	2	0.4613	0	1	1	618.337	1235.67	2.36	0.00146	CID (Collision Induced Dissociation)	MS2	0	488.236	75.1372	8178	DG009795_Gallo_32.raw	0/0		3.75	1.82404e+07	75.26	0	0.009492
	FALSE	High	Sequest HT (A2)	A	Unambiguous	GFLTATLGLTAGNADA		1	2	r3.14267	r3.14267; r1.27087	r3.14267; r1.27087	0	2	0.5	0	1	1	746.887	1492.77	1.81	0.00135	CID (Collision Induced Dissociation)	MS2	7.93621	756.722	75.9033	8268	DG009795_Gallo_32.raw	0/0		4.5	3.06202e+06	75.83	0	0.001041
	FALSE	High	Sequest HT (A2)	A	Unambiguous	TATLGLTAGNADAKLEGNGTLSQKQYQRLASQQF		1	1	r3.14267	r3.14267	r3.14267	0	3	0.469	0	1	1	1194.29	3580.85	2.76	0.0033	CID (Collision Induced Dissociation)	MS2	0	604.341	52.2229	5546	DG009790_Gallo_30.raw	0/0		4.35	790031	52.23	0	0.003392
	FALSE	High	Sequest HT (A2)	A	Selected	LTATLGLTAGNADAKLEGNGTLSQKQYQRLASQQF		1	1	r3.14267	r3.14267	r3.14267	0	4	0.0052	0	1	1	924.237	3693.92	1.48	0.00137	CID (Collision Induced Dissociation)	MS2	0	538.55	56.3358	5985	DG009790_Gallo_30.raw	0/0		1.93	1.28909e+07	56.32	0	0.02127
	FALSE	High	Sequest HT (A2)	A	Unambiguous	TATLGLTAGNADAKLEGNGTLSQKQYQRLASQQF		1	1	r3.14267	r3.14267	r3.14267	0	4	0.2209	0	1	1	895.966	3580.84	2.37	0.00212	CID (Collision Induced Dissociation)	MS2	0	1000	52.0929	5533	DG009790_Gallo_30.raw	0/0		3.35	1.19157e+07	52.22	0	0.003932
	FALSE	High	Sequest HT (A2)	A	Unambiguous	ATLGLTAGNADAKLEGNGTLSQKQYQRLASQQF		1	1	r3.14267	r3.14267	r3.14267	0	4	0.2429	0	1	1	870.704	3479.8	2.32	0.00202	CID (Collision Induced Dissociation)	MS2	0	583.647	51.4651	5467	DG009790_Gallo_30.raw	0/0		3.17	2.76641e+06	51.52	0	0.003989
	FALSE	High	Sequest HT (A2)	A	Unambiguous	TLGLTAGNADAKLEGNGTLSQKQYQRLASQQF		1	1	r3.14267	r3.14267	r3.14267	0	4	0.0532	0	1	1	852.945	3408.76	2.58	0.0022	CID (Collision Induced Dissociation)	MS2	0	606.52	50.8722	5403	DG009790_Gallo_30.raw	0/0		3.01	6.33417e+06	50.9	0	0.006468
	FALSE	High	Sequest HT (A2)	A	Unambiguous	GFLTATLGLTAGNADA		1	2	r3.14267	r3.14267; r1.27087	r3.14267; r1.27087	0	2	0.2314	0	1	1	746.889	1492.77	3.93	0.00293	CID (Collision Induced Dissociation)	MS2	0	326.859	75.9818	8685	DG009785_Gallo_26.raw	0/0		2.55	191465	75.9	0	0.02919
	FALSE	High	Sequest HT (A2)	A	Unambiguous	FLTATLGLTAGN		1	2	r3.14267	r3.14267; r1.27087	r3.14267; r1.27087	0	2	0.3051	0	1	1	589.826	1178.64	1.94	0.00114	CID (Collision Induced Dissociation)	MS2	0	584.556	67.2136	7598	DG009785_Gallo_26.raw	0/0		2.95	705679	67.17	0	0.006547
	FALSE	High	Sequest HT (A2)	A	Unambiguous	LTATLGLTAGNADA		1	2	r3.14267	r3.14267; r1.27087	r3.14267; r1.27087	0	2	0.3681	0	1	1	644.843	1288.68	2.88	0.00185	CID (Collision Induced Dissociation)	MS2	16.7308	988.04	52.6179	6005	DG009785_Gallo_26.raw	0/0		3.83	1.21836e+06	52.59	0	0.007679
	FALSE	High	Sequest HT (A2)	A	Unambiguous	LTATLGLTAGN		1	2	r3.14267	r3.14267; r1.27087	r3.14267; r1.27087	0	2	0.2522	0	1	1	516.291	1031.58	2.03	0.00105	CID (Collision Induced Dissociation)	MS2	29.4492	468.907	50.1663	5323	DG009790_Gallo_30.raw	0/0		2.3	1.10287e+06	50.21	0	0.06351
	FALSE	High	Sequest HT (A2)	A	Unambiguous	VGFLTATLGLTAGNADAKLEGNGTLSQKQYQRL		1	2	r3.14267	r3.14267; r1.27087	r3.14267; r1.27087	0	4	0.0725	0	1	1	859.714	3435.83	2.8	0.0024	CID (Collision Induced Dissociation)	MS2	45.9768	370.733	66.182	7101	DG009790_Gallo_30.raw	0/0		2.76	6.50275e+06	66.3	0	0.001658
	FALSE	High	Sequest HT (A2)	A	Unambiguous	FLTATLGLTAGN		1	2	r3.14267	r3.14267; r1.27087	r3.14267; r1.27087	0	2	0.3021	0	1	1	589.826	1178.64	2.04	0.0012	CID (Collision Induced Dissociation)	MS2	5.84667	130.132	67.1091	7236	DG009790_Gallo_30.raw	0/0		2.88	3.13002e+06	67.08	0	0.004333
	FALSE	High	Sequest HT (A2)	A	Unambiguous	FLTATLGLTAGNADA		1	2	r3.14267	r3.14267; r1.27087	r3.14267; r1.27087	0	2	0.3932	0	1	1	718.377	1435.75	2.88	0.00207	CID (Collision Induced Dissociation)	MS2	31.1458	342.199	68.0609	7353	DG009790_Gallo_30.raw	0/0		3.84	440738	68.03	0	0.001313
	FALSE	High	Sequest HT (A2)	A	Unambiguous	VGFLTATLGLTAGNADAKLEGNGTLSQKQ		1	2	r3.14267	r3.14267; r1.27087	r3.14267; r1.27087	0	3	0.1667	0	1	1	959.18	2875.52	3.1	0.00297	CID (Collision Induced Dissociation)	MS2	0	754.38	67.5894	7292	DG009790_Gallo_30.raw	0/0		2.88	466984	67.57	0	0.01292
	FALSE	High	Sequest HT (A2)	A	Unambiguous	GFLTATLGLTAGN		1	2	r3.14267	r3.14267; r1.27087	r3.14267; r1.27087	0	2	0.0722	0	1	1	618.326	1235.64	-15.42	-0.00953	CID (Collision Induced Dissociation)	MS2	42.4547	218.687	75.9004	8470	DG009790_Gallo_30.raw	0/0		1.94	371787	75.85	0.003364	0.1244
	FALSE	High	Sequest HT (A2)	A	Unambiguous	LTATLGLTAGN		1	2	r3.14267	r3.14267; r1.27087	r3.14267; r1.27087	0	2	0.3028	0	1	1	516.291	1031.58	2.15	0.00111	CID (Collision Induced Dissociation)	MS2	29.1111	413.662	50.2078	5766	DG009785_Gallo_26.raw	0/0		2.51	494003	50.24	0.005932	0.1911
	FALSE	High	Sequest HT (A2)	A	Unambiguous	GFLTATLGLTAGN		1	2	r3.14267	r3.14267; r1.27087	r3.14267; r1.27087	0	2	0.2738	0	1	1	618.336	1235.67	2.06	0.00127	CID (Collision Induced Dissociation)	MS2	22.9022	205.695	75.7785	8442	DG009790_Gallo_30.raw	0/0		2.63	1.61479e+07	75.22	0.005932	0.1625
FALSE	High	Master Protein	r2.10559	r2.10559	LYASYLIHITIEVEKVKEVIDMLILALLKKSIEFFNDTFNNKK	>r2.10559; >r1.28737	0	21.65	51.1628	6	45	6	1	43	5.1	7.24	High	High	High	High	1.15912e+07	1.33102e+08	2.47993e+07	563373	111.26	6
	Checked	Confidence	Identifying Node	Search ID	PSM Ambiguity	Annotated Sequence	Modifications	# Protein Groups	# Proteins	Master Protein Accessions	Protein Accessions	Protein Descriptions	# Missed Cleavages	Charge	DeltaScore	DeltaCn	Rank	Search Engine Rank	m/z [Da]	MH+ [Da]	DeltaM [ppm]	Deltam/z [Da]	Activation Type	MS Order	Isolation Interference [%]	Ion Inject Time [ms]	RT [min]	First Scan	Spectrum File	Ions Matched	Annotation	XCorr	Area	Apex RT [min]	Percolator q-Value	Percolator PEP
	FALSE	High	Sequest HT (A2)	A	Unambiguous	mLILALLKKS	M1(Oxidation)	1	1	r2.10559	r2.10559	r2.10559	0	2	0.2817	0	1	1	573.371	1145.74	2.1	0.0012	CID (Collision Induced Dissociation)	MS2	25.3941	597.97	56.0854	5982	DG009795_Gallo_32.raw	0/0		2.52	1.93949e+07	56.24	0	0.05252
	FALSE	High	Sequest HT (A2)	A	Unambiguous	LILALLKKSIEFFNDTFNNKK		1	1	r2.10559	r2.10559	r2.10559	0	3	0.4606	0	1	1	832.813	2496.42	0.71	0.00059	CID (Collision Induced Dissociation)	MS2	0	63.191	79.1529	9047	DG009790_Gallo_30.raw	0/0		5.58	1.87435e+07	79.15	0	0.0002014
	FALSE	High	Sequest HT (A2)	A	Unambiguous	MLILALLKKSIEFFNDTFNNKK		1	1	r2.10559	r2.10559	r2.10559	0	4	0.3818	0	1	1	657.614	2627.44	-10.28	-0.00675	CID (Collision Induced Dissociation)	MS2	0	113.51	79.6325	9217	DG009790_Gallo_30.raw	0/0		3.3			0	0.02476
	FALSE	High	Sequest HT (A2)	A	Unambiguous	LILALLKKSIEFFNDTFNNKK		1	1	r2.10559	r2.10559	r2.10559	0	4	0.416	0	1	1	624.863	2496.43	2.76	0.00172	CID (Collision Induced Dissociation)	MS2	20.5747	90.679	79.5486	9191	DG009790_Gallo_30.raw	0/0		3.63			0	0.002451
	FALSE	High	Sequest HT (A2)	A	Unambiguous	mLILALLKKSIEFFNDTFNNKK	M1(Oxidation)	1	1	r2.10559	r2.10559	r2.10559	0	3	0.2206	0	1	1	881.824	2643.46	-0.05	-4e-05	CID (Collision Induced Dissociation)	MS2	8.88675	44.225	79.1414	8745	DG009795_Gallo_32.raw	0/0		2.72	32084592	79.12	0	0.02174
	FALSE	High	Sequest HT (A2)	A	Unambiguous	mLILALLKKSIEFFNDTFNNKK	M1(Oxidation)	1	1	r2.10559	r2.10559	r2.10559	0	4	0.2637	0	1	1	661.62	2643.46	-0.63	-0.00041	CID (Collision Induced Dissociation)	MS2	0	46.946	79.137	8740	DG009795_Gallo_32.raw	0/0		2.73	4.62997e+07	79.12	0	0.002853
	FALSE	High	Sequest HT (A2)	A	Unambiguous	mLILALLKKS	M1(Oxidation)	1	1	r2.10559	r2.10559	r2.10559	0	2	0.2852	0	1	1	573.371	1145.73	1.14	0.00065	CID (Collision Induced Dissociation)	MS2	0	408.864	56.6992	6020	DG009790_Gallo_30.raw	0/0		2.7	3.6824e+07	56.3	0	0.08366
	FALSE	High	Sequest HT (A2)	A	Unambiguous	mLILALLKKS	M1(Oxidation)	1	1	r2.10559	r2.10559	r2.10559	0	2	0.229	0	1	1	573.371	1145.73	1.25	0.00071	CID (Collision Induced Dissociation)	MS2	0	441.615	57.2097	6079	DG009790_Gallo_30.raw	0/0		2.62	1.54074e+06	57.23	0	0.07812
	FALSE	High	Sequest HT (A2)	A	Unambiguous	mLILALLKKS	M1(Oxidation)	1	1	r2.10559	r2.10559	r2.10559	0	2	0.3176	0	1	1	573.371	1145.73	1.78	0.00102	CID (Collision Induced Dissociation)	MS2	0	474.348	57.7662	6139	DG009790_Gallo_30.raw	0/0		2.96	335640	57.85	0	0.06394
	FALSE	High	Sequest HT (A2)	A	Unambiguous	mLILALLKKS	M1(Oxidation)	1	1	r2.10559	r2.10559	r2.10559	0	3	0.274	0	1	1	382.583	1145.73	0.49	0.00019	HCD (High Energy Collision Dissociation)	MS2	0	675.78	57.8639	6148	DG009790_Gallo_30.raw	0/0		2.08	297123	57.8	0	0.06226
	FALSE	High	Sequest HT (A2)	A	Unambiguous	mLILALLKKS	M1(Oxidation)	1	1	r2.10559	r2.10559	r2.10559	0	2	0.1779	0	1	1	573.371	1145.73	1.35	0.00077	CID (Collision Induced Dissociation)	MS2	16.2045	453.946	58.2751	6192	DG009790_Gallo_30.raw	0/0		2.53	605741	58.12	0	0.04336
	FALSE	High	Sequest HT (A2)	A	Unambiguous	mLILALLKKS	M1(Oxidation)	1	1	r2.10559	r2.10559	r2.10559	0	2	0.1469	0	1	1	573.371	1145.73	1.78	0.00102	CID (Collision Induced Dissociation)	MS2	9.73591	1000	59.8547	6368	DG009790_Gallo_30.raw	0/0		2.45	106234	59.87	0	0.07166
	FALSE	High	Sequest HT (A2)	A	Unambiguous	mLILALLKKS	M1(Oxidation)	1	1	r2.10559	r2.10559	r2.10559	0	2	0.284	0	1	1	573.371	1145.73	1.67	0.00096	CID (Collision Induced Dissociation)	MS2	13.6383	431.29	59.3388	6310	DG009790_Gallo_30.raw	0/0		2.5	585384	59.29	0	0.05797
	FALSE	High	Sequest HT (A2)	A	Unambiguous	mLILALLKKS	M1(Oxidation)	1	1	r2.10559	r2.10559	r2.10559	0	2	0.2235	0	1	1	573.371	1145.73	1.99	0.00114	CID (Collision Induced Dissociation)	MS2	6.84079	414.155	58.7816	6243	DG009790_Gallo_30.raw	0/0		2.55	489622	58.5	0	0.07675
	FALSE	High	Sequest HT (A2)	A	Unambiguous	mLILALLKKS	M1(Oxidation)	1	1	r2.10559	r2.10559	r2.10559	0	3	0.214	0	1	1	382.583	1145.73	1.61	0.00061	HCD (High Energy Collision Dissociation)	MS2	0	520.98	56.4038	6412	DG009785_Gallo_26.raw	0/0		2.43	2.79392e+06	56.43	0	0.05401
	FALSE	High	Sequest HT (A2)	A	Unambiguous	mLILALLKKS	M1(Oxidation)	1	1	r2.10559	r2.10559	r2.10559	0	2	0.1888	0	1	1	573.372	1145.74	2.74	0.00157	CID (Collision Induced Dissociation)	MS2	18.428	733.992	56.259	6399	DG009785_Gallo_26.raw	0/0		2.49	1.15912e+07	56.42	0	0.05972
	FALSE	High	Sequest HT (A2)	A	Unambiguous	mLILALLKKS	M1(Oxidation)	1	1	r2.10559	r2.10559	r2.10559	0	2	0.0737	0	1	1	573.371	1145.73	1.67	0.00096	CID (Collision Induced Dissociation)	MS2	8.83462	410.679	60.369	6424	DG009790_Gallo_30.raw	0/0		2.17	271541	60.32	0	0.05992
	FALSE	High	Sequest HT (A2)	A	Unambiguous	MLILALLKK		1	1	r2.10559	r2.10559	r2.10559	0	2	0.2	0	1	1	521.857	1042.71	1.8	0.00094	CID (Collision Induced Dissociation)	MS2	0	309.053	64.5117	6897	DG009790_Gallo_30.raw	0/0		2.7	8.9131e+07	64.67	0	0.07508
	FALSE	High	Sequest HT (A2)	A	Unambiguous	MLILALLKK		1	1	r2.10559	r2.10559	r2.10559	0	2	0.1741	0	1	1	521.857	1042.71	1.57	0.00082	CID (Collision Induced Dissociation)	MS2	0	397.664	65.0475	6958	DG009790_Gallo_30.raw	0/0		2.7	8.9131e+07	64.67	0	0.039
	FALSE	High	Sequest HT (A2)	A	Unambiguous	MLILALLKKS		1	1	r2.10559	r2.10559	r2.10559	0	2	0.2842	0	1	1	565.374	1129.74	2.49	0.00141	CID (Collision Induced Dissociation)	MS2	14.8486	415.494	65.531	7014	DG009790_Gallo_30.raw	0/0		2.85	6.41016e+06	65.65	0	0.09101
	FALSE	High	Sequest HT (A2)	A	Unambiguous	MLILALLKK		1	1	r2.10559	r2.10559	r2.10559	0	2	0.1643	0	1	1	521.857	1042.71	1.34	0.0007	CID (Collision Induced Dissociation)	MS2	6.45083	468.576	65.621	7024	DG009790_Gallo_30.raw	0/0		2.13			0	0.06187
	FALSE	High	Sequest HT (A2)	A	Unambiguous	mLILALLKKSIE	M1(Oxidation)	1	1	r2.10559	r2.10559	r2.10559	0	2	0.2369	0	1	1	694.434	1387.86	1.24	0.00086	CID (Collision Induced Dissociation)	MS2	21.7942	733.552	67.0939	7233	DG009790_Gallo_30.raw	0/0		2.49	3.45266e+07	67.39	0	0.0104
	FALSE	High	Sequest HT (A2)	A	Unambiguous	mLILALLKKSIE	M1(Oxidation)	1	1	r2.10559	r2.10559	r2.10559	0	2	0.2406	0	1	1	694.435	1387.86	2.03	0.00141	CID (Collision Induced Dissociation)	MS2	0	309.029	67.6043	7294	DG009790_Gallo_30.raw	0/0		2.66	3.45266e+07	67.39	0	0.03841
	FALSE	High	Sequest HT (A2)	A	Unambiguous	mLILALLKKS	M1(Oxidation)	1	1	r2.10559	r2.10559	r2.10559	0	2	0.1685	0	1	1	573.371	1145.73	1.99	0.00114	CID (Collision Induced Dissociation)	MS2	14.3767	541.827	62.0336	6611	DG009790_Gallo_30.raw	0/0		2.67			0	0.0465
	FALSE	High	Sequest HT (A2)	A	Unambiguous	mLILALLKKS	M1(Oxidation)	1	1	r2.10559	r2.10559	r2.10559	0	2	0.1739	0	1	1	573.371	1145.73	1.89	0.00108	CID (Collision Induced Dissociation)	MS2	13.3116	308.301	62.5139	6666	DG009790_Gallo_30.raw	0/0		2.53	129825	62.56	0	0.04513
	FALSE	High	Sequest HT (A2)	A	Unambiguous	MLILALLKKS		1	1	r2.10559	r2.10559	r2.10559	0	2	0.1441	0	1	1	565.373	1129.74	1.73	0.00098	CID (Collision Induced Dissociation)	MS2	33.0802	486.131	65.618	7037	DG009795_Gallo_32.raw	0/0		2.22	477138	65.66	0.003364	0.1257
	FALSE	High	Sequest HT (A2)	A	Unambiguous	LILALLKK		1	1	r2.10559	r2.10559	r2.10559	0	2	0.1222	0	1	2	456.337	911.667	1.62	0.00074	CID (Collision Induced Dissociation)	MS2	36.1166	799.944	50.7769	5393	DG009790_Gallo_30.raw	0/0		1.8			0.003364	0.1374
	FALSE	High	Sequest HT (A2)	A	Unambiguous	mLILALLKK	M1(Oxidation)	1	1	r2.10559	r2.10559	r2.10559	0	2	0.1773	0	1	1	529.854	1058.7	0.35	0.00019	CID (Collision Induced Dissociation)	MS2	0	675.89	55.1397	5862	DG009790_Gallo_30.raw	0/0		2.2	5.54823e+08	55.4	0.003364	0.1548
	FALSE	High	Sequest HT (A2)	A	Unambiguous	mLILALLKKS	M1(Oxidation)	1	1	r2.10559	r2.10559	r2.10559	0	2	0.2407	0	1	1	573.37	1145.73	0.82	0.00047	CID (Collision Induced Dissociation)	MS2	4.15593	824.117	56.1834	5968	DG009790_Gallo_30.raw	0/0		2.16	3.6824e+07	56.3	0.003364	0.1253
	FALSE	High	Sequest HT (A2)	A	Unambiguous	mLILALLKK	M1(Oxidation)	1	1	r2.10559	r2.10559	r2.10559	0	2	0.1579	0	1	1	529.855	1058.7	1.51	0.0008	CID (Collision Induced Dissociation)	MS2	0	361.486	65.1319	6966	DG009790_Gallo_30.raw	0/0		2.28	142699	65.12	0.003364	0.139
	FALSE	High	Sequest HT (A2)	A	Unambiguous	mLILALLKKS	M1(Oxidation)	1	1	r2.10559	r2.10559	r2.10559	0	2	0.094	0	1	1	573.371	1145.73	1.99	0.00114	CID (Collision Induced Dissociation)	MS2	0	1000	63.0523	6724	DG009790_Gallo_30.raw	0/0		2.34	239126	62.88	0.005932	0.1962
	FALSE	High	Sequest HT (A2)	A	Unambiguous	mLILALLKK	M1(Oxidation)	1	1	r2.10559	r2.10559	r2.10559	0	2	0.0733	0	1	1	529.854	1058.7	0.82	0.00043	CID (Collision Induced Dissociation)	MS2	0	1000	55.3746	6048	DG009800_Gallo_36.raw	0/0		1.91	563373	55.41	0.005932	0.1716
	FALSE	High	Sequest HT (A2)	A	Unambiguous	mLILALLKK	M1(Oxidation)	1	1	r2.10559	r2.10559	r2.10559	0	2	0.1491	0	1	1	529.855	1058.7	1.51	0.0008	CID (Collision Induced Dissociation)	MS2	0	139.507	60.3492	6421	DG009790_Gallo_30.raw	0/0		2.28			0.005932	0.2039
	FALSE	High	Sequest HT (A2)	A	Unambiguous	mLILALLKK	M1(Oxidation)	1	1	r2.10559	r2.10559	r2.10559	0	2	0.1598	0	1	1	529.855	1058.7	1.39	0.00074	CID (Collision Induced Dissociation)	MS2	0	100.587	57.7563	6138	DG009790_Gallo_30.raw	0/0		2.44	2.47796e+06	57.81	0.005932	0.2003
	FALSE	High	Sequest HT (A2)	A	Unambiguous	mLILALLKK	M1(Oxidation)	1	1	r2.10559	r2.10559	r2.10559	0	2	0.1913	0	1	1	529.855	1058.7	1.51	0.0008	CID (Collision Induced Dissociation)	MS2	0	639.606	55.2295	5897	DG009795_Gallo_32.raw	0/0		2.3	8.70313e+06	55.37	0.005932	0.1621
	FALSE	High	Sequest HT (A2)	A	Unambiguous	mLILALLKK	M1(Oxidation)	1	1	r2.10559	r2.10559	r2.10559	0	2	0.2176	0	1	1	529.855	1058.7	1.39	0.00074	CID (Collision Induced Dissociation)	MS2	3.77036	584.22	64.0738	6847	DG009790_Gallo_30.raw	0/0		2.39	3.35204e+06	63.63	0.005932	0.1845
	FALSE	High	Sequest HT (A2)	A	Selected	mLILALLKKSIE	M1(Oxidation)	1	1	r2.10559	r2.10559	r2.10559	0	3	0.0175	0	1	1	463.292	1387.86	0.95	0.00044	HCD (High Energy Collision Dissociation)	MS2	0	595.989	67.1251	7238	DG009790_Gallo_30.raw	0/0		1.71	9.18769e+06	67.26	0.005932	0.1787
	FALSE	High	Sequest HT (A2)	A	Unambiguous	MLILALLKK		1	1	r2.10559	r2.10559	r2.10559	0	2	0.1596	0	1	1	521.857	1042.71	1.45	0.00076	CID (Collision Induced Dissociation)	MS2	0	507.373	67.2985	7258	DG009790_Gallo_30.raw	0/0		2.13	327226	67.36	0.005932	0.1889
	FALSE	High	Sequest HT (A2)	A	Unambiguous	mLILALLKK	M1(Oxidation)	1	1	r2.10559	r2.10559	r2.10559	0	2	0.1404	0	1	1	529.855	1058.7	1.39	0.00074	CID (Collision Induced Dissociation)	MS2	0	464.044	63.5422	6780	DG009790_Gallo_30.raw	0/0		2.28	3.35204e+06	63.63	0.005932	0.1957
	FALSE	High	Sequest HT (A2)	A	Unambiguous	mLILALLKK	M1(Oxidation)	1	1	r2.10559	r2.10559	r2.10559	0	2	0.2098	0	1	1	529.855	1058.7	1.51	0.0008	CID (Collision Induced Dissociation)	MS2	1.35928	130.459	61.37	6534	DG009790_Gallo_30.raw	0/0		2.24	629197	61.3	0.005932	0.173
	FALSE	High	Sequest HT (A2)	A	Unambiguous	mLILALLKK	M1(Oxidation)	1	1	r2.10559	r2.10559	r2.10559	0	2	0.2103	0	1	1	529.854	1058.7	0.93	0.00049	CID (Collision Induced Dissociation)	MS2	0	238.866	62.4433	6659	DG009790_Gallo_30.raw	0/0		2.33			0.005932	0.1765
	FALSE	High	Sequest HT (A2)	A	Unambiguous	mLILALLKK	M1(Oxidation)	1	1	r2.10559	r2.10559	r2.10559	0	2	0.2112	0	1	1	529.854	1058.7	1.05	0.00055	CID (Collision Induced Dissociation)	MS2	19.4997	413.341	64.6162	6910	DG009790_Gallo_30.raw	0/0		2.32	343818	64.61	0.005932	0.1599
	FALSE	High	Sequest HT (A2)	A	Unambiguous	mLILALLKKS	M1(Oxidation)	1	1	r2.10559	r2.10559	r2.10559	0	3	0.2609	0	1	1	382.582	1145.73	0.01	0	HCD (High Energy Collision Dissociation)	MS2	0	346.308	56.2025	5971	DG009790_Gallo_30.raw	0/0		2.3	6.30628e+06	56.27	0.005932	0.1625
	FALSE	High	Sequest HT (A2)	A	Unambiguous	mLILALLKK	M1(Oxidation)	1	1	r2.10559	r2.10559	r2.10559	0	2	0.1121	0	1	1	529.854	1058.7	0.93	0.00049	CID (Collision Induced Dissociation)	MS2	0.704928	91.914	58.2658	6191	DG009790_Gallo_30.raw	0/0		2.14	3.79553e+06	58.18	0.005932	0.1853
	FALSE	High	Sequest HT (A2)	A	Unambiguous	LILALLKK		1	1	r2.10559	r2.10559	r2.10559	0	2	0.0996	0	1	1	456.337	911.667	1.48	0.00068	CID (Collision Induced Dissociation)	MS2	14.1573	231.68	50.2254	5331	DG009790_Gallo_30.raw	0/0		2.51	2.05947e+07	50.32	0.008844	0.2065
FALSE	High	Master Protein	f1.20423	f1.20423	KTVENFDKVKDIIVDRLGVDADKVTEDASFKDDLGADSLDIAELVMELEDEFGTEIPDEEAEKINTVGDAVNYINTLEK	>f1.20423; >f1.12598	0	20.007	32.9114	8	11	8	1	79	8.8	4.12	Not Found	High	High	Not Found		4.00744e+06	732001		40.54	8
	Checked	Confidence	Identifying Node	Search ID	PSM Ambiguity	Annotated Sequence	Modifications	# Protein Groups	# Proteins	Master Protein Accessions	Protein Accessions	Protein Descriptions	# Missed Cleavages	Charge	DeltaScore	DeltaCn	Rank	Search Engine Rank	m/z [Da]	MH+ [Da]	DeltaM [ppm]	Deltam/z [Da]	Activation Type	MS Order	Isolation Interference [%]	Ion Inject Time [ms]	RT [min]	First Scan	Spectrum File	Ions Matched	Annotation	XCorr	Area	Apex RT [min]	Percolator q-Value	Percolator PEP
	FALSE	High	Sequest HT (A2)	A	Unambiguous	TVGDAVNYINTLEK		1	1	f1.20423	f1.20423	f1.20423	0	2	0.5141	0	1	1	768.9	1536.79	0.9	0.00069	CID (Collision Induced Dissociation)	MS2	0	1000	53.1129	5681	DG009795_Gallo_32.raw	0/0		3.89	660665	53.1	0	0.001236
	FALSE	High	Sequest HT (A2)	A	Unambiguous	NTVGDAVNYINTLEK		1	1	f1.20423	f1.20423	f1.20423	0	2	0.3264	0	1	1	825.924	1650.84	3.89	0.00321	CID (Collision Induced Dissociation)	MS2	0	583.328	57.7299	6170	DG009795_Gallo_32.raw	0/0		2.42	153408	57.73	0	0.07246
	FALSE	High	Sequest HT (A2)	A	Unambiguous	TEIPDEEAEKINTVGDAVNYINTLEK		1	1	f1.20423	f1.20423	f1.20423	0	3	0.2887	0	1	1	969.151	2905.44	2.14	0.00208	CID (Collision Induced Dissociation)	MS2	0	490.893	66.9868	7202	DG009795_Gallo_32.raw	0/0		3.81	1.03756e+06	67.05	0	0.0257
	FALSE	High	Sequest HT (A2)	A	Unambiguous	DAVNYINTLEK		1	1	f1.20423	f1.20423	f1.20423	0	2	0.2347	0	1	1	640.331	1279.66	1.93	0.00123	CID (Collision Induced Dissociation)	MS2	0	769.039	45.573	4862	DG009795_Gallo_32.raw	0/0		2.77	510863	45.57	0	0.01654
	FALSE	High	Sequest HT (A2)	A	Unambiguous	TVGDAVNYINTLEK		1	1	f1.20423	f1.20423	f1.20423	0	2	0.5528	0	1	1	768.9	1536.79	1.38	0.00106	CID (Collision Induced Dissociation)	MS2	15.4581	816.762	53.1126	5641	DG009790_Gallo_30.raw	0/0		4.07	3.72901e+06	53.16	0	0.0006002
	FALSE	High	Sequest HT (A2)	A	Unambiguous	AEKINTVGDAVNYINTLEK		1	1	f1.20423	f1.20423	f1.20423	0	3	0.4273	0	1	1	698.036	2092.09	1.11	0.00077	CID (Collision Induced Dissociation)	MS2	0	569.744	57.3385	6093	DG009790_Gallo_30.raw	0/0		5.43	3.48883e+06	57.37	0	0.0003187
	FALSE	High	Sequest HT (A2)	A	Unambiguous	EEAEKINTVGDAVNYINTLEK		1	1	f1.20423	f1.20423	f1.20423	0	3	0.4327	0	1	1	784.065	2350.18	1.13	0.00088	CID (Collision Induced Dissociation)	MS2	0	985.094	59.6737	6348	DG009790_Gallo_30.raw	0/0		4.9	2.55769e+06	59.78	0	0.001087
	FALSE	High	Sequest HT (A2)	A	Unambiguous	AVNYINTLEK		1	1	f1.20423	f1.20423	f1.20423	0	2	0.2353	0	1	1	582.818	1164.63	2.19	0.00128	CID (Collision Induced Dissociation)	MS2	0	281.239	37.3953	3982	DG009790_Gallo_30.raw	0/0		2.72	3.02772e+06	37.45	0	0.04016
	FALSE	High	Sequest HT (A2)	A	Unambiguous	TEIPDEEAEKINTVGDAVNYINTLEK		1	1	f1.20423	f1.20423	f1.20423	0	3	0.4087	0	1	1	969.151	2905.44	2.21	0.00214	CID (Collision Induced Dissociation)	MS2	0	304.413	66.9065	7206	DG009790_Gallo_30.raw	0/0		5.26	7.23397e+06	66.92	0	8.55649e-06
	FALSE	High	Sequest HT (A2)	A	Unambiguous	IPDEEAEKINTVGDAVNYINTLEK		1	1	f1.20423	f1.20423	f1.20423	0	3	0.2043	0	1	1	892.452	2675.34	0.12	0.0001	CID (Collision Induced Dissociation)	MS2	0	1000	64.9253	6953	DG009795_Gallo_32.raw	0/0		2.79			0.003364	0.115
	FALSE	High	Sequest HT (A2)	A	Unambiguous	AVNYINTLEK		1	1	f1.20423	f1.20423	f1.20423	0	2	0.2048	0	1	1	582.818	1164.63	2.61	0.00152	CID (Collision Induced Dissociation)	MS2	0	585.482	37.2823	3982	DG009795_Gallo_32.raw	0/0		2.49	1.29751e+06	37.35	0.003364	0.1321
FALSE	High	Master Protein	f2.2413	f2.2413	YFVFFAQFTHTKDLNIYLSMEITTIMEEVAIMAQDIISTVIDFIKLIAETVQKFTK	>f2.2413	0	12.323	39.2857	6	11	6	1	56	6.5	4.81	Not Found	High	High	Not Found		865397607	1.90299e+07		30.72	6
	Checked	Confidence	Identifying Node	Search ID	PSM Ambiguity	Annotated Sequence	Modifications	# Protein Groups	# Proteins	Master Protein Accessions	Protein Accessions	Protein Descriptions	# Missed Cleavages	Charge	DeltaScore	DeltaCn	Rank	Search Engine Rank	m/z [Da]	MH+ [Da]	DeltaM [ppm]	Deltam/z [Da]	Activation Type	MS Order	Isolation Interference [%]	Ion Inject Time [ms]	RT [min]	First Scan	Spectrum File	Ions Matched	Annotation	XCorr	Area	Apex RT [min]	Percolator q-Value	Percolator PEP
	FALSE	High	Sequest HT (A2)	A	Unambiguous	TVIDFIKLIAETVQK		1	1	f2.2413	f2.2413	f2.2413	0	2	0.285	0	1	1	859.512	1718.02	4.46	0.00383	CID (Collision Induced Dissociation)	MS2	0	1000	81.5853	9600	DG009790_Gallo_30.raw	0/0		2	73231.7	81.49	0	0.07009
	FALSE	High	Sequest HT (A2)	A	Unambiguous	TVIDFIKLIAETVQK		1	1	f2.2413	f2.2413	f2.2413	0	2	0.4135	0	1	1	859.51	1718.01	1.19	0.00102	CID (Collision Induced Dissociation)	MS2	0	226.723	79.888	9332	DG009790_Gallo_30.raw	0/0		3.7	1701579460	79.3	0	0.00389
	FALSE	High	Sequest HT (A2)	A	Unambiguous	ISTVIDFIKLIAET		1	1	f2.2413	f2.2413	f2.2413	0	2	0.429	0	1	1	781.956	1562.9	0.07	6e-05	CID (Collision Induced Dissociation)	MS2	0	50.911	79.4101	9141	DG009790_Gallo_30.raw	0/0		3.17	29215754	79.39	0	0.02522
	FALSE	High	Sequest HT (A2)	A	Unambiguous	TVIDFIKLIAETVQK		1	1	f2.2413	f2.2413	f2.2413	0	2	0.3493	0	1	1	859.509	1718.01	0.83	0.00071	CID (Collision Induced Dissociation)	MS2	0	873.653	81.0552	9545	DG009790_Gallo_30.raw	0/0		2.72	132421	81.17	0	0.04984
	FALSE	High	Sequest HT (A2)	A	Unambiguous	mAQDIISTVIDFIKL	M1(Oxidation)	1	1	f2.2413	f2.2413	f2.2413	0	3	0.3489	0	1	1	574.982	1722.93	-2.18	-0.00125	HCD (High Energy Collision Dissociation)	MS2	0	62.595	79.507	9103	DG009795_Gallo_32.raw	0/0		3.21	1.4977e+06	79.46	0	0.08694
	FALSE	High	Sequest HT (A2)	A	Unambiguous	QDIISTVIDFIKL		1	1	f2.2413	f2.2413	f2.2413	0	2	0.4461	0	1	1	752.936	1504.86	1.78	0.00134	CID (Collision Induced Dissociation)	MS2	0	41.405	79.4968	9092	DG009795_Gallo_32.raw	0/0		3.34	3.52761e+07	79.46	0	0.001812
	FALSE	High	Sequest HT (A2)	A	Unambiguous	mAQDIISTVIDFIKLIAETVQK	M1(Oxidation)	1	1	f2.2413	f2.2413	f2.2413	0	3	0.212	0	1	1	831.461	2492.37	-0.21	-0.00017	CID (Collision Induced Dissociation)	MS2	0.912948	44.66	79.3579	8933	DG009795_Gallo_32.raw	0/0		2.5	36559336	79.31	0	0.01058
	FALSE	High	Sequest HT (A2)	A	Unambiguous	AQDIISTVIDFIKL		1	1	f2.2413	f2.2413	f2.2413	0	2	0.2744	0	1	1	788.458	1575.91	5.41	0.00426	CID (Collision Induced Dissociation)	MS2	22.3621	504.692	80.8109	9586	DG009795_Gallo_32.raw	0/0		2.66	358179	80.62	0	0.09332
	FALSE	High	Sequest HT (A2)	A	Unambiguous	AQDIISTVIDFIKL		1	1	f2.2413	f2.2413	f2.2413	0	2	0.4535	0	1	1	788.453	1575.9	-0.55	-0.00044	CID (Collision Induced Dissociation)	MS2	0	1000	81.9969	9723	DG009795_Gallo_32.raw	0/0		2.69	2.78641e+06	82.05	0	0.002907
	FALSE	High	Sequest HT (A2)	A	Unambiguous	AQDIISTVIDFIKL		1	1	f2.2413	f2.2413	f2.2413	0	2	0.3497	0	1	1	788.455	1575.9	2.62	0.00207	CID (Collision Induced Dissociation)	MS2	0	29.593	79.5928	9183	DG009795_Gallo_32.raw	0/0		2.86	884525	79.76	0.003364	0.1356
	FALSE	High	Sequest HT (A2)	A	Unambiguous	QDIISTVIDFIKL		1	1	f2.2413	f2.2413	f2.2413	0	2	0.25	0	1	1	752.934	1504.86	-0.58	-0.00043	CID (Collision Induced Dissociation)	MS2	0	359.453	80.4307	9521	DG009795_Gallo_32.raw	0/0		1.88	213782	80.55	0.005932	0.1673
FALSE	High	Master Protein	r1.23994	r1.23994	GVNLMNQFSKIMLATSLSATMMLGAVTVTQSDDSAQAATQYQKPYYTYKGVFNYQDNNALRDKTFYNALKNDNFKYENLKVGESTQEDVENALGSNLKKYYQEKGIMYYERNDIIVGIKDGKLVDLTLLVDKVKNSSQDMASHVKKGEVYDTDSTYVAFYRGNSIVIKSKTISQK	>r1.23994	0	9.239	13.7143	4	6	4	1	175	19.8	8.59	High	Not Found	High	High	288683		470342	406058	19.27	4
	Checked	Confidence	Identifying Node	Search ID	PSM Ambiguity	Annotated Sequence	Modifications	# Protein Groups	# Proteins	Master Protein Accessions	Protein Accessions	Protein Descriptions	# Missed Cleavages	Charge	DeltaScore	DeltaCn	Rank	Search Engine Rank	m/z [Da]	MH+ [Da]	DeltaM [ppm]	Deltam/z [Da]	Activation Type	MS Order	Isolation Interference [%]	Ion Inject Time [ms]	RT [min]	First Scan	Spectrum File	Ions Matched	Annotation	XCorr	Area	Apex RT [min]	Percolator q-Value	Percolator PEP
	FALSE	High	Sequest HT (A2)	A	Unambiguous	mmLGAVTVTQSDDSAQA	M1(Oxidation); M2(Oxidation)	1	2	r1.23994	r1.23994; r3.17694	r1.23994; r3.17694	0	2	0.4242	0	1	1	878.895	1756.78	5.4	0.00474	CID (Collision Induced Dissociation)	MS2	100	1000	37.3178	4341	DG009785_Gallo_26.raw	0/0		3.3	288683	37.3	0	0.1013
	FALSE	High	Sequest HT (A2)	A	Unambiguous	ATSLSATmmLGAVTVTQSDDSAQA	M8(Oxidation); M9(Oxidation)	1	2	r1.23994	r1.23994; r3.17694	r1.23994; r3.17694	0	2	0.4858	0	1	1	1194.55	2388.1	2.61	0.00312	CID (Collision Induced Dissociation)	MS2	0	1000	51.9067	5549	DG009795_Gallo_32.raw	0/0		3.17	238380	51.82	0	0.03047
	FALSE	High	Sequest HT (A2)	A	Unambiguous	SATmmLGAVTVTQSDDSAQA	M4(Oxidation); M5(Oxidation)	1	2	r1.23994	r1.23994; r3.17694	r1.23994; r3.17694	0	2	0.5378	0	1	1	1008.45	2015.9	4.16	0.00419	CID (Collision Induced Dissociation)	MS2	0	1000	40.0972	4273	DG009795_Gallo_32.raw	0/0		3.31	477794	40.15	0	0.00136
	FALSE	High	Sequest HT (A2)	A	Unambiguous	TmmLGAVTVTQSDDSAQA	M2(Oxidation); M3(Oxidation)	1	2	r1.23994	r1.23994; r3.17694	r1.23994; r3.17694	0	2	0.5224	0	1	1	929.414	1857.82	0.66	0.00062	CID (Collision Induced Dissociation)	MS2	0	1000	38.3962	4101	DG009795_Gallo_32.raw	0/0		3.12	301167	38.43	0	0.027
	FALSE	High	Sequest HT (A2)	A	Unambiguous	mmLGAVTVTQSDDSAQA	M1(Oxidation); M2(Oxidation)	1	2	r1.23994	r1.23994; r3.17694	r1.23994; r3.17694	0	2	0.4543	0	1	1	878.892	1756.78	2.48	0.00218	CID (Collision Induced Dissociation)	MS2	0	1000	37.215	3975	DG009795_Gallo_32.raw	0/0		3.72	864025	37.28	0	0.0005159
	FALSE	High	Sequest HT (A2)	A	Unambiguous	mmLGAVTVTQSDDSAQA	M1(Oxidation); M2(Oxidation)	1	2	r1.23994	r1.23994; r3.17694	r1.23994; r3.17694	0	2	0.4318	0	1	1	878.892	1756.78	2.27	0.00199	CID (Collision Induced Dissociation)	MS2	0	1000	37.2975	4032	DG009800_Gallo_36.raw	0/0		2.64	406058	37.38	0	0.02721
FALSE	High	Master Protein	f1.20000	f1.20000	MKINKRSALLMPKRNDIETILVIGSGPIIIGQAAEFDYAGTQACLALKEEGYRVILVNSNPATIMTDKEIADKVYIEPLTHDFIARIIRKEQPDALLPTLGGQTGLNMAIELHDSGVLESNNVKLLGTELSSINQAEDRELFRSLMNDLNVPVPESDIVNTLEQAFAFKNQVGYPLIVRPAFTMGGTGGGICHNDEELKEVVSNGLKYSPATQCLIEKSIAGYKEIEYEVMRDQNDNAIVVCNMENIDPVGIHTGDSVVVAPSQTLSDVEYQMLRDVSLKVIRALKIEGGCNVQLALDPHSMQYYIIEVNPRVSRSSALASKATGYPIAKLAAKIAVGLTLDEMKNPVTGTSYAAFEPSLDYIVSKIPRFPFDKFEKGERELGTQMKATGEVMSIGRTY…	>f1.20000	0	6.128	2.2493	2	4	2	1	1067	117.9	5.07	Not Found	Not Found	High	Not Found			3.00584e+06		15.7	2
	Checked	Confidence	Identifying Node	Search ID	PSM Ambiguity	Annotated Sequence	Modifications	# Protein Groups	# Proteins	Master Protein Accessions	Protein Accessions	Protein Descriptions	# Missed Cleavages	Charge	DeltaScore	DeltaCn	Rank	Search Engine Rank	m/z [Da]	MH+ [Da]	DeltaM [ppm]	Deltam/z [Da]	Activation Type	MS Order	Isolation Interference [%]	Ion Inject Time [ms]	RT [min]	First Scan	Spectrum File	Ions Matched	Annotation	XCorr	Area	Apex RT [min]	Percolator q-Value	Percolator PEP
	FALSE	High	Sequest HT (A2)	A	Unambiguous	SLDTANALTNVIESmTFSmRNm	M15(Oxidation); M19(Oxidation); M22(Oxidation)	1	2	f1.20000	f2.19694; f1.20000	f2.19694; f1.20000	0	3	0.2083	0	1	1	832.049	2494.13	2.3	0.00191	CID (Collision Induced Dissociation)	MS2	0	504.11	69.5611	7494	DG009795_Gallo_32.raw	0/0		2.64	880647	69.6	0	0.01323
	FALSE	High	Sequest HT (A2)	A	Unambiguous	LTSLDTANALTNVIESmTFSmRNm	M17(Oxidation); M21(Oxidation); M24(Oxidation)	1	2	f1.20000	f2.19694; f1.20000	f2.19694; f1.20000	0	3	0.3926	0	1	1	903.426	2708.26	2.67	0.00241	CID (Collision Induced Dissociation)	MS2	6.61748	410.678	76.3954	8323	DG009795_Gallo_32.raw	0/0		4.89	5.07121e+06	76.47	0	5.624e-05
	FALSE	High	Sequest HT (A2)	A	Unambiguous	LTSLDTANALTNVIESmTFSmRNm	M17(Oxidation); M21(Oxidation); M24(Oxidation)	1	2	f1.20000	f2.19694; f1.20000	f2.19694; f1.20000	0	3	0.5712	0	1	1	903.426	2708.26	2.33	0.0021	CID (Collision Induced Dissociation)	MS2	45.3284	314.538	75.8739	8261	DG009795_Gallo_32.raw	0/0		5.97	3.96805e+06	75.99	0	0.003821
	FALSE	High	Sequest HT (A2)	A	Selected	SLDTANALTNVIESmTFSmRNm	M15(Oxidation); M19(Oxidation); M22(Oxidation)	1	2	f1.20000	f2.19694; f1.20000	f2.19694; f1.20000	0	3		0.0045	2	2	832.048	2494.13	1.93	0.0016	CID (Collision Induced Dissociation)	MS2	17.6816	545.558	70.1402	7574	DG009795_Gallo_32.raw	0/0		2.21	940474	70.09	0.005932	0.1811
FALSE	High	Master Protein	r3.21462	r3.21462	ILPTDWRDNMRTIIRAAIAVVTIIAITNFIDKPDNLSTLERYKDQVVYSDSVQSFLNSKPIEHVQNLELSDVLPSDFF	>r3.21462	0	5.682	33.3333	3	4	3	1	78	8.9	4.83	Not Found	High	High	Not Found		1.20647e+07	2.41394e+06		13.73	3
	Checked	Confidence	Identifying Node	Search ID	PSM Ambiguity	Annotated Sequence	Modifications	# Protein Groups	# Proteins	Master Protein Accessions	Protein Accessions	Protein Descriptions	# Missed Cleavages	Charge	DeltaScore	DeltaCn	Rank	Search Engine Rank	m/z [Da]	MH+ [Da]	DeltaM [ppm]	Deltam/z [Da]	Activation Type	MS Order	Isolation Interference [%]	Ion Inject Time [ms]	RT [min]	First Scan	Spectrum File	Ions Matched	Annotation	XCorr	Area	Apex RT [min]	Percolator q-Value	Percolator PEP
	FALSE	High	Sequest HT (A2)	A	Unambiguous	TIIAITNFIDKPDNLSTLERYKDQVV		1	1	r3.21462	r3.21462	r3.21462	0	3	0.4908	0	1	1	1002.88	3006.62	1.96	0.00196	CID (Collision Induced Dissociation)	MS2	0	304.557	74.7828	8278	DG009790_Gallo_30.raw	0/0		4.36	1.20647e+07	74.87	0	0.008907
	FALSE	High	Sequest HT (A2)	A	Unambiguous	TIIAITNFIDKP		1	2	r3.21462	r3.21462; r1.18036	r3.21462; r1.18036	0	2	0.1815	0	1	1	673.391	1345.77	1.76	0.00119	CID (Collision Induced Dissociation)	MS2	0	732.202	72.4573	7849	DG009795_Gallo_32.raw	0/0		2.92	4.28133e+06	72.03	0	0.009644
	FALSE	High	Sequest HT (A2)	A	Unambiguous	TIIAITNFIDKP		1	2	r3.21462	r3.21462; r1.18036	r3.21462; r1.18036	0	2	0.2736	0	1	1	673.386	1345.76	-5.86	-0.00394	CID (Collision Induced Dissociation)	MS2	0	1000	71.8971	7785	DG009795_Gallo_32.raw	0/0		3.18	4.28133e+06	72.03	0	0.01159
	FALSE	High	Sequest HT (A2)	A	Unambiguous	TIIAITNFIDKPDNLSTLERY		1	1	r3.21462	r3.21462	r3.21462	0	3	0.3058	0	1	1	813.106	2437.3	2.16	0.00176	CID (Collision Induced Dissociation)	MS2	16.6983	244.604	76.7964	8381	DG009795_Gallo_32.raw	0/0		3.27	546556	76.76	0	0.02421
FALSE	High	Master Protein	f3.18585	f3.18585	IDLIKGVRYKMEQQSYVIIDETGIHARPATMLVQTASKFDSDIQLEYNAKKVNLKSIMGVMSLGVGKDAEITIYADGSDESEAIKAITEVLSKEGLTK	>f3.18585; >f2.10939	0	4.967	22.449	2	2	2	1	98	10.7	5.21	Not Found	High	High	Not Found		6.58833e+06	302440		6.79	2
	Checked	Confidence	Identifying Node	Search ID	PSM Ambiguity	Annotated Sequence	Modifications	# Protein Groups	# Proteins	Master Protein Accessions	Protein Accessions	Protein Descriptions	# Missed Cleavages	Charge	DeltaScore	DeltaCn	Rank	Search Engine Rank	m/z [Da]	MH+ [Da]	DeltaM [ppm]	Deltam/z [Da]	Activation Type	MS Order	Isolation Interference [%]	Ion Inject Time [ms]	RT [min]	First Scan	Spectrum File	Ions Matched	Annotation	XCorr	Area	Apex RT [min]	Percolator q-Value	Percolator PEP
	FALSE	High	Sequest HT (A2)	A	Unambiguous	GSDESEAIKAITEVLSKEGLTK		1	1	f3.18585	f3.18585	f3.18585	0	3	0.1522	0	1	1	769.078	2305.22	3.06	0.00235	CID (Collision Induced Dissociation)	MS2	31.0953	580.416	77.267	8445	DG009795_Gallo_32.raw	0/0		2.76	302440	77.26	0	0.01345
	FALSE	High	Sequest HT (A2)	A	Unambiguous	ESEAIKAITEVLSKEGLTK		1	1	f3.18585	f3.18585	f3.18585	0	3	0.4665	0	1	1	682.717	2046.14	1.98	0.00135	CID (Collision Induced Dissociation)	MS2	0	731.645	70.3831	7666	DG009790_Gallo_30.raw	0/0		4.03	6.58833e+06	70.49	0	0.0008017
FALSE	High	Master Protein	f2.18856	f2.18856	QRNRKGKIMKNKNISRLLMGAATLTLATMIANGEAKADEVTQEASVEQSQNEFETDQQRAFYHTLHLEDVTEDQRNQYIKTIREEPTRAQEVFSESVKDSINPERRTAQQNAFYGVLHNEDLSEKKRNEYIEQIKKNPDHSQQVWIDSINPTELEQNRANAEQAINDFDANKHAQDKVKVYEENAKLPESERMLNNYIVEQISKDKANTRKNDRIDSANKALTALNTQDSIENRRQAQREVNKAPMAVQEQLQKQLNAITKQHDENVKEDAIALGDKHTSAANDALLQLKETDSVEKRKEAEDKIKKAPKHVQAQLQNQLDAIISQHEQKKVQPEVEKVVTEEKAEDTNADAKEDNQVMTPPTQVETHSTLASYYHSLKDSLKKDYDSVYNTFNKGYQQ…	>f2.18856	0	4.733	12.3288	3	4	3	1	511	58.5	6.46	Not Found	High	High	Not Found		4.56811e+06	1.8904e+06		5.27	3
	Checked	Confidence	Identifying Node	Search ID	PSM Ambiguity	Annotated Sequence	Modifications	# Protein Groups	# Proteins	Master Protein Accessions	Protein Accessions	Protein Descriptions	# Missed Cleavages	Charge	DeltaScore	DeltaCn	Rank	Search Engine Rank	m/z [Da]	MH+ [Da]	DeltaM [ppm]	Deltam/z [Da]	Activation Type	MS Order	Isolation Interference [%]	Ion Inject Time [ms]	RT [min]	First Scan	Spectrum File	Ions Matched	Annotation	XCorr	Area	Apex RT [min]	Percolator q-Value	Percolator PEP
	FALSE	High	Sequest HT (A2)	A	Unambiguous	TLTLATmIANGE	M7(Oxidation)	1	2	f2.18856	f2.18856; f2.6787	f2.18856; f2.6787	0	2	0.1636	0	1	1	625.82	1250.63	2.25	0.00141	CID (Collision Induced Dissociation)	MS2	0	1000	53.35	5707	DG009795_Gallo_32.raw	0/0		2.14			0	0.07476
	FALSE	High	Sequest HT (A2)	A	Unambiguous	IREEPTRAQEVFSESVKDSINPERRTAQQNAFYG		1	2	f2.18856	f2.18856; f2.6787	f2.18856; f2.6787	0	5	0.2353	0	1	1	791.399	3952.97	3.39	0.00268	CID (Collision Induced Dissociation)	MS2	100	1000	46.3961	4952	DG009795_Gallo_32.raw	0/0		2.72	1.06388e+06	46.37	0	0.009667
	FALSE	High	Sequest HT (A2)	A	Unambiguous	TAEAASTIKNAFSSIFS		1	1	f2.18856	f2.18856	f2.18856	0	2	0.3291	0	1	1	872.945	1744.88	3.9	0.0034	CID (Collision Induced Dissociation)	MS2	0	733.705	74.447	8090	DG009795_Gallo_32.raw	0/0		3.13	2.71692e+06	74.59	0	0.02556
	FALSE	High	Sequest HT (A2)	A	Unambiguous	IREEPTRAQEVFSESVKDSINPERRTAQQNAFYG		1	2	f2.18856	f2.18856; f2.6787	f2.18856; f2.6787	0	5	0.0502	0	1	1	791.399	3952.96	2.55	0.00201	CID (Collision Induced Dissociation)	MS2	0	504.873	46.3742	4911	DG009790_Gallo_30.raw	0/0		2.19	4.56811e+06	46.45	0	0.1041
FALSE	High	Master Protein	r1.21326	r1.21326	IFLVSQFENEKIIFTGGLIIMKKTLFASTLALTLGVTGVATHATNAHAAEENIDKVELAELASSNDPSLNQHPIHEGAYDYKFTLEGVSYHFWSNGTQFGWTYNGYGNVTDTVAQPAQFDIQDVNAQATQSNGSNTVSNVQQSNTQAPAATSAPQTTQTSTASTGVNAHLALIKNRESGGNYSAINPTSGAAGAYQFLPSTWDSVARSIDPSYVGKSPASAPASVQDRFAQYLYNTAGPSQWVTA	>r1.21326	0	3.967	12.2449	2	6	2	1	245	26	5.24	High	High	High	High	384810	1.48421e+06	2.51073e+06	917162	22.61	2
	Checked	Confidence	Identifying Node	Search ID	PSM Ambiguity	Annotated Sequence	Modifications	# Protein Groups	# Proteins	Master Protein Accessions	Protein Accessions	Protein Descriptions	# Missed Cleavages	Charge	DeltaScore	DeltaCn	Rank	Search Engine Rank	m/z [Da]	MH+ [Da]	DeltaM [ppm]	Deltam/z [Da]	Activation Type	MS Order	Isolation Interference [%]	Ion Inject Time [ms]	RT [min]	First Scan	Spectrum File	Ions Matched	Annotation	XCorr	Area	Apex RT [min]	Percolator q-Value	Percolator PEP
	FALSE	High	Sequest HT (A2)	A	Unambiguous	AEENIDKVELAELASSND		1	1	r1.21326	r1.21326	r1.21326	0	2	0.3967	0	1	1	973.965	1946.92	2.11	0.00205	CID (Collision Induced Dissociation)	MS2	15.3076	513.448	51.2861	5474	DG009795_Gallo_32.raw	0/0		4.21	2.51073e+06	51.35	0	0.003598
	FALSE	High	Sequest HT (A2)	A	Unambiguous	ALTLGVTGVATH		1	2	r1.21326	r1.21326; r1.18070	r1.21326; r1.18070	0	2	0.2	0	1	1	570.325	1139.64	1.39	0.00079	CID (Collision Induced Dissociation)	MS2	39.5082	797.356	47.7197	5090	DG009795_Gallo_32.raw	0/0		3.05			0	0.0686
	FALSE	High	Sequest HT (A2)	A	Unambiguous	AEENIDKVELAELASSND		1	1	r1.21326	r1.21326	r1.21326	0	2	0.5229	0	1	1	973.965	1946.92	2.29	0.00223	CID (Collision Induced Dissociation)	MS2	0	798.553	51.3456	5631	DG009800_Gallo_36.raw	0/0		4.15	917162	51.37	0	0.002651
	FALSE	High	Sequest HT (A2)	A	Unambiguous	AEENIDKVELAELASSND		1	1	r1.21326	r1.21326	r1.21326	0	2	0.4662	0	1	1	973.967	1946.93	3.61	0.00352	CID (Collision Induced Dissociation)	MS2	100	731.002	51.2844	5448	DG009790_Gallo_30.raw	0/0		4.29	2.72563e+06	51.39	0	0.04956
	FALSE	High	Sequest HT (A2)	A	Unambiguous	AEENIDKVELAELASSND		1	1	r1.21326	r1.21326	r1.21326	0	2	0.3966	0	1	1	973.965	1946.92	2.29	0.00223	CID (Collision Induced Dissociation)	MS2	100	624.833	51.4657	5889	DG009785_Gallo_26.raw	0/0		3.58	384810	51.43	0	0.01101
	FALSE	High	Sequest HT (A2)	A	Unambiguous	ALTLGVTGVATH		1	2	r1.21326	r1.21326; r1.18070	r1.21326; r1.18070	0	2	0.2259	0	1	1	570.326	1139.64	2.57	0.00146	CID (Collision Induced Dissociation)	MS2	50.1709	867.476	47.6217	5048	DG009790_Gallo_30.raw	0/0		3.32	242796	47.64	0	0.04072
FALSE	High	Master Protein	f2.18722	f2.18722	NTRRISIMSLIGKQIEDFTAQAYNAKSDEFVEVTQEDLKGSWSVVVFYPADFSFVCPTELQDVQNQYAKLQELGVNVYSVSTDTHFVHKAWHDHSDAISSIEYTMIGDPSQTITRNFDVLNEESGLAQRGTFIVDPDGVVQAAEINADGIGRDASTLVHKIKAAQYVRQNPGEVCPAKWEEGNDTLTPGLDLVGKI	>f2.18722; >f1.6641	0	3.92	22.449	2	3	2	1	196	21.7	4.74	Not Found	High	High	Not Found		896894	2.65085e+06		9.14	2
	Checked	Confidence	Identifying Node	Search ID	PSM Ambiguity	Annotated Sequence	Modifications	# Protein Groups	# Proteins	Master Protein Accessions	Protein Accessions	Protein Descriptions	# Missed Cleavages	Charge	DeltaScore	DeltaCn	Rank	Search Engine Rank	m/z [Da]	MH+ [Da]	DeltaM [ppm]	Deltam/z [Da]	Activation Type	MS Order	Isolation Interference [%]	Ion Inject Time [ms]	RT [min]	First Scan	Spectrum File	Ions Matched	Annotation	XCorr	Area	Apex RT [min]	Percolator q-Value	Percolator PEP
	FALSE	High	Sequest HT (A2)	A	Unambiguous	PSQTITRNFDVLNEESGLAQRGTFIVD		1	1	f2.18722	f2.18722	f2.18722	0	3	0.1447	0	1	1	1003.18	3007.52	3.75	0.00376	CID (Collision Induced Dissociation)	MS2	0	732.613	67.6493	7273	DG009795_Gallo_32.raw	0/0		3.11	4.70149e+06	67.68	0	0.004548
	FALSE	High	Sequest HT (A2)	A	Unambiguous	EEGNDTLTPGLDLVGKI		1	1	f2.18722	f2.18722	f2.18722	0	2	0.2536	0	1	1	885.962	1770.92	2.58	0.00228	CID (Collision Induced Dissociation)	MS2	100	787.741	72.1704	7813	DG009795_Gallo_32.raw	0/0		2.76	600212	72.23	0	0.07598
	FALSE	High	Sequest HT (A2)	A	Unambiguous	EEGNDTLTPGLDLVGKI		1	1	f2.18722	f2.18722	f2.18722	0	2	0.4343	0	1	1	885.963	1770.92	3.41	0.00302	CID (Collision Induced Dissociation)	MS2	0	411.446	72.1995	7916	DG009790_Gallo_30.raw	0/0		3.27	896894	72.21	0	0.02643
FALSE	High	Master Protein	r3.4075	r3.4075	WNDALFCGIFNLTTMQKRVCLMKKIAVLTSGGDSPGMNAAIRAVVRKAIYHNIEVYGVYQGYLGLINDDIHKLELGSVGDTIQRGGTFLYSARCPEFKEKDVRAKGIENLRKRGIEGLVVIGGDGSYRGAQRISEECKDIQTIGIPGTIDNDINGTDFTIGFDTALNTIIDSVDKIRDTASSHARTFIIEVMGRDCGDLALWSGLAVGAETIITPETSYDMKDIAEKIQHGIDRGKKHSIIIVAEGCMTGDSCASELTKYINVDARVSVLGHIQRGGSPTGADRVLASRLGGYAVELLMSGDSAKGVGIKDNKLIATDFNTIFNGSSEVKYTQRMLDLTKELSI	>r3.4075; >r2.16340	0	2.986	3.48837	1	2	1	1	344	37.2	6.33	Not Found	High	Not Found	Not Found		292807			4.51	1
	Checked	Confidence	Identifying Node	Search ID	PSM Ambiguity	Annotated Sequence	Modifications	# Protein Groups	# Proteins	Master Protein Accessions	Protein Accessions	Protein Descriptions	# Missed Cleavages	Charge	DeltaScore	DeltaCn	Rank	Search Engine Rank	m/z [Da]	MH+ [Da]	DeltaM [ppm]	Deltam/z [Da]	Activation Type	MS Order	Isolation Interference [%]	Ion Inject Time [ms]	RT [min]	First Scan	Spectrum File	Ions Matched	Annotation	XCorr	Area	Apex RT [min]	Percolator q-Value	Percolator PEP
	FALSE	High	Sequest HT (A2)	A	Unambiguous	MKKIAVLTSGGD		1	1	r3.4075	r3.4075	r3.4075	0	2	0.1991	0	1	1	610.341	1219.67	1.86	0.00113	CID (Collision Induced Dissociation)	MS2	57.0841	803.676	26.9894	2878	DG009790_Gallo_30.raw	0/0		2.31			0	0.09254
	FALSE	High	Sequest HT (A2)	A	Unambiguous	mKKIAVLTSGGD	M1(Oxidation)	1	1	r3.4075	r3.4075	r3.4075	0	2	0.1455	0	1	1	618.338	1235.67	2.2	0.00136	CID (Collision Induced Dissociation)	MS2	0	777.259	20.9717	2269	DG009790_Gallo_30.raw	0/0		2.2	292807	21	0	0.01116
FALSE	High	Master Protein	r1.13868	r1.13868	FYGGFNMQKINDMNAFKSVIQSDSPVIIKFEAGWCPDCRAMDMWIDPIVEKYNAYQWYTVNRDELEEAAIENDVMGIPSLLIFKNGQKLHHLHSAHAKSPEQVESYLSESLG	>r1.13868; >f1.23936	0	2.855	38.3929	2	2	2	1	112	12.8	5.02	Not Found	High	Not Found	Not Found		1.18956e+06			6.73	2
	Checked	Confidence	Identifying Node	Search ID	PSM Ambiguity	Annotated Sequence	Modifications	# Protein Groups	# Proteins	Master Protein Accessions	Protein Accessions	Protein Descriptions	# Missed Cleavages	Charge	DeltaScore	DeltaCn	Rank	Search Engine Rank	m/z [Da]	MH+ [Da]	DeltaM [ppm]	Deltam/z [Da]	Activation Type	MS Order	Isolation Interference [%]	Ion Inject Time [ms]	RT [min]	First Scan	Spectrum File	Ions Matched	Annotation	XCorr	Area	Apex RT [min]	Percolator q-Value	Percolator PEP
	FALSE	High	Sequest HT (A2)	A	Unambiguous	AKSPEQVESYLSESLG		1	1	r1.13868	r1.13868	r1.13868	0	2	0.2756	0	1	1	862.424	1723.84	1.52	0.00131	CID (Collision Induced Dissociation)	MS2	0	1000	53.5832	5688	DG009790_Gallo_30.raw	0/0		3.81	680659	53.6	0	0.07237
	FALSE	High	Sequest HT (A2)	A	Unambiguous	mQKINDmNAFKSVIQSDSPVIIKFEAG	M1(Oxidation); M7(Oxidation)	1	1	r1.13868	r1.13868	r1.13868	0	4	0.1678	0	1	1	761.39	3042.54	3.22	0.00245	CID (Collision Induced Dissociation)	MS2	0	1000	64.8411	6934	DG009790_Gallo_30.raw	0/0		2.92	1.69847e+06	64.83	0	0.01931
FALSE	High	Master Protein	r2.15199	r2.15199	VLMSFIVNLIKKAIEFFSGLFNK	>r2.15199; >f1.6380	0	2.738	47.8261	1	18	1	1	23	2.7	9.72	Not Found	High	High	Not Found		1.67425e+08	1.02924e+07		53.21	1
	Checked	Confidence	Identifying Node	Search ID	PSM Ambiguity	Annotated Sequence	Modifications	# Protein Groups	# Proteins	Master Protein Accessions	Protein Accessions	Protein Descriptions	# Missed Cleavages	Charge	DeltaScore	DeltaCn	Rank	Search Engine Rank	m/z [Da]	MH+ [Da]	DeltaM [ppm]	Deltam/z [Da]	Activation Type	MS Order	Isolation Interference [%]	Ion Inject Time [ms]	RT [min]	First Scan	Spectrum File	Ions Matched	Annotation	XCorr	Area	Apex RT [min]	Percolator q-Value	Percolator PEP
	FALSE	High	Sequest HT (A2)	A	Unambiguous	mSFIVNLIKKA	M1(Oxidation)	1	1	r2.15199	r2.15199	r2.15199	0	2	0.44	0	1	1	640.376	1279.75	0.61	0.00039	CID (Collision Induced Dissociation)	MS2	0	923.389	56.6563	6016	DG009790_Gallo_30.raw	0/0		3	1.67425e+08	56.91	0	0.03893
	FALSE	High	Sequest HT (A2)	A	Unambiguous	mSFIVNLIKKA	M1(Oxidation)	1	1	r2.15199	r2.15199	r2.15199	0	2	0.4	0	1	1	640.377	1279.75	1.66	0.00106	CID (Collision Induced Dissociation)	MS2	0	195.235	57.179	6075	DG009790_Gallo_30.raw	0/0		3.45	1.67425e+08	56.91	0	0.03198
	FALSE	High	Sequest HT (A2)	A	Unambiguous	mSFIVNLIKKA	M1(Oxidation)	1	1	r2.15199	r2.15199	r2.15199	0	2	0.4526	0	1	1	640.377	1279.75	1.95	0.00125	CID (Collision Induced Dissociation)	MS2	1.55816	235.972	58.2298	6187	DG009790_Gallo_30.raw	0/0		3.27			0	0.04873
	FALSE	High	Sequest HT (A2)	A	Unambiguous	mSFIVNLIKKA	M1(Oxidation)	1	1	r2.15199	r2.15199	r2.15199	0	2	0.4241	0	1	1	640.377	1279.75	2.14	0.00137	CID (Collision Induced Dissociation)	MS2	0	271.27	60.362	6423	DG009790_Gallo_30.raw	0/0		3.16	565832	60.33	0	0.04774
	FALSE	High	Sequest HT (A2)	A	Unambiguous	mSFIVNLIKKA	M1(Oxidation)	1	1	r2.15199	r2.15199	r2.15199	0	2	0.4551	0	1	1	640.377	1279.75	1.95	0.00125	CID (Collision Induced Dissociation)	MS2	2.56719	491.864	59.8077	6364	DG009790_Gallo_30.raw	0/0		3.12	577410	59.76	0	0.02258
	FALSE	High	Sequest HT (A2)	A	Unambiguous	mSFIVNLIKKA	M1(Oxidation)	1	1	r2.15199	r2.15199	r2.15199	0	2	0.2857	0	1	1	640.377	1279.75	2.14	0.00137	CID (Collision Induced Dissociation)	MS2	0	204.603	59.2826	6301	DG009790_Gallo_30.raw	0/0		2.73	1.26046e+06	59.31	0	0.04336
	FALSE	High	Sequest HT (A2)	A	Unambiguous	mSFIVNLIKKA	M1(Oxidation)	1	1	r2.15199	r2.15199	r2.15199	0	2	0.3547	0	1	1	640.377	1279.75	2.05	0.00131	CID (Collision Induced Dissociation)	MS2	0	298.537	58.7317	6238	DG009790_Gallo_30.raw	0/0		3.27	470481	58.69	0	0.03014
	FALSE	High	Sequest HT (A2)	A	Unambiguous	mSFIVNLIKKA	M1(Oxidation)	1	1	r2.15199	r2.15199	r2.15199	0	2	0.4216	0	1	1	640.377	1279.75	2.43	0.00155	CID (Collision Induced Dissociation)	MS2	0	848.608	60.8742	6475	DG009790_Gallo_30.raw	0/0		2.87	827158	60.72	0	0.0209
	FALSE	High	Sequest HT (A2)	A	Unambiguous	MSFIVNLIKKA		1	1	r2.15199	r2.15199	r2.15199	0	2	0.3203	0	1	1	632.38	1263.75	2.3	0.00145	CID (Collision Induced Dissociation)	MS2	0	585.339	63.4861	6771	DG009790_Gallo_30.raw	0/0		3.06	3.95928e+07	63.66	0	0.08756
	FALSE	High	Sequest HT (A2)	A	Unambiguous	mSFIVNLIKKA	M1(Oxidation)	1	1	r2.15199	r2.15199	r2.15199	0	2	0.3487	0	1	1	640.377	1279.75	2.05	0.00131	CID (Collision Induced Dissociation)	MS2	0	1000	63.007	6717	DG009790_Gallo_30.raw	0/0		3.04	619059	62.79	0	0.04624
	FALSE	High	Sequest HT (A2)	A	Unambiguous	mSFIVNLIKKA	M1(Oxidation)	1	1	r2.15199	r2.15199	r2.15199	0	2	0.4058	0	1	1	640.377	1279.75	2.24	0.00143	CID (Collision Induced Dissociation)	MS2	14.7156	233.632	61.9246	6598	DG009790_Gallo_30.raw	0/0		3.45	481989	61.97	0	0.08817
	FALSE	High	Sequest HT (A2)	A	Unambiguous	mSFIVNLIKKA	M1(Oxidation)	1	1	r2.15199	r2.15199	r2.15199	0	2	0.3007	0	1	1	640.377	1279.75	1.76	0.00113	CID (Collision Induced Dissociation)	MS2	17.3031	621.271	62.4579	6660	DG009790_Gallo_30.raw	0/0		2.86	341249	62.53	0	0.04945
	FALSE	High	Sequest HT (A2)	A	Unambiguous	mSFIVNLIKKA	M1(Oxidation)	1	1	r2.15199	r2.15199	r2.15199	0	2	0.3164	0	1	1	640.377	1279.75	2.14	0.00137	CID (Collision Induced Dissociation)	MS2	0	279.721	61.3828	6536	DG009790_Gallo_30.raw	0/0		2.75	686157	61.49	0.003364	0.1322
	FALSE	High	Sequest HT (A2)	A	Unambiguous	mSFIVNLIKKA	M1(Oxidation)	1	1	r2.15199	r2.15199	r2.15199	0	2	0.126	0	1	1	640.378	1279.75	2.71	0.00174	CID (Collision Induced Dissociation)	MS2	0	902.144	57.1604	6106	DG009795_Gallo_32.raw	0/0		2.54	1.02924e+07	56.9	0.003364	0.1404
	FALSE	High	Sequest HT (A2)	A	Unambiguous	mSFIVNLIKKA	M1(Oxidation)	1	1	r2.15199	r2.15199	r2.15199	0	2	0.3741	0	1	1	640.378	1279.75	3.09	0.00198	CID (Collision Induced Dissociation)	MS2	0	578.796	56.671	6050	DG009795_Gallo_32.raw	0/0		2.94	1.02924e+07	56.9	0.003364	0.1445
	FALSE	High	Sequest HT (A2)	A	Unambiguous	MSFIVNLIKKA		1	1	r2.15199	r2.15199	r2.15199	0	2	0.1326	0	1	1	632.38	1263.75	2.3	0.00145	CID (Collision Induced Dissociation)	MS2	0	501.368	64.0327	6842	DG009790_Gallo_30.raw	0/0		2.64	3.95928e+07	63.66	0.003364	0.154
	FALSE	High	Sequest HT (A2)	A	Unambiguous	mSFIVNLIKKA	M1(Oxidation)	1	1	r2.15199	r2.15199	r2.15199	0	2	0.4483	0	1	1	640.377	1279.75	1.76	0.00113	CID (Collision Induced Dissociation)	MS2	0	360.265	57.7137	6134	DG009790_Gallo_30.raw	0/0		2.61	1.05829e+06	57.81	0.005932	0.157
	FALSE	High	Sequest HT (A2)	A	Unambiguous	MSFIVNLIKKA		1	1	r2.15199	r2.15199	r2.15199	0	2	0.0898	0	1	1	632.38	1263.75	2.59	0.00164	CID (Collision Induced Dissociation)	MS2	21.8897	582.006	64.5582	6904	DG009790_Gallo_30.raw	0/0		2.45	178002	64.53	0.005932	0.1632
FALSE	High	Master Protein	f1.3837	f1.3837	IKGVSIMSFMSIIIYMIILMILPMYAQYKVKSNYEKYSQVRSTSGKTGKEVALEILHANGIYDVEVKEGQGFLTDHYDPKNKVVVLSPANFNRPSVAGTAIAAHEVGHAIQHYEGYFFLRFRTALVPVANLGSSLSYLFIMAGFVLTMLQMAIGTTALWIGIFLMAFAVLFSIVTLPVEFDASKRAMNQIQRLNIVNEKEYKHAGRVLRAAAMTYVAATAVAVAELVRFILIARSAE	>f1.3837; >r2.6866	0	2.474	8.01688	1	4	1	1	237	26.3	9.42	Not Found	High	Not Found	Not Found		20135479			8.76	1
	Checked	Confidence	Identifying Node	Search ID	PSM Ambiguity	Annotated Sequence	Modifications	# Protein Groups	# Proteins	Master Protein Accessions	Protein Accessions	Protein Descriptions	# Missed Cleavages	Charge	DeltaScore	DeltaCn	Rank	Search Engine Rank	m/z [Da]	MH+ [Da]	DeltaM [ppm]	Deltam/z [Da]	Activation Type	MS Order	Isolation Interference [%]	Ion Inject Time [ms]	RT [min]	First Scan	Spectrum File	Ions Matched	Annotation	XCorr	Area	Apex RT [min]	Percolator q-Value	Percolator PEP
	FALSE	High	Sequest HT (A2)	A	Unambiguous	TAVAVAELVRFILIARSAE		1	1	f1.3837	f1.3837	f1.3837	0	3	0.1961	0	1	1	677.065	2029.18	0.28	0.00019	CID (Collision Induced Dissociation)	MS2	0	31.3	79.2559	9075	DG009790_Gallo_30.raw	0/0		3.11	20135479	79.21	0	0.003359
	FALSE	High	Sequest HT (A2)	A	Unambiguous	TAVAVAELVRFILIARSAE		1	1	f1.3837	f1.3837	f1.3837	0	3	0.2812	0	1	1	677.065	2029.18	0.73	0.00049	CID (Collision Induced Dissociation)	MS2	0	520.647	81.0562	9546	DG009790_Gallo_30.raw	0/0		2.56	218094	81.13	0.003364	0.1521
	FALSE	High	Sequest HT (A2)	A	Unambiguous	TAVAVAELVRFILIARSAE		1	1	f1.3837	f1.3837	f1.3837	0	3	0.082	0	1	1	677.066	2029.18	1.36	0.00092	CID (Collision Induced Dissociation)	MS2	0	154.318	79.856	9319	DG009790_Gallo_30.raw	0/0		1.83	7.7871e+06	79.53	0.005932	0.1853
	FALSE	High	Sequest HT (A2)	A	Unambiguous	TAVAVAELVRFILIARSAE		1	1	f1.3837	f1.3837	f1.3837	0	3	0.1909	0	1	1	677.065	2029.18	0.01	1e-05	CID (Collision Induced Dissociation)	MS2	0	1000	81.6298	9607	DG009790_Gallo_30.raw	0/0		3.09	221252	81.51	0.005932	0.1789
FALSE	High	Master Protein	f2.8743	f2.8743	YCPCNTFRCHFKSTRSDEYNRFNSVPHPESMDAIKYLKELFMMNYEKYIDHTLLKPETTRDQIDRIIEEAKTYHFKSVCVNPTHVEYAAQQLEGSDVLVCTVIGFPLGASTTETKAFETRDAIAKGADEIDMVINIGALKDGRDDDVQRDIEAVVEAAQGHTVKVIIETVLLTDEEKVKASELSKAAGAHFVKTSTGFAGGGATPEDVKLMKDTVGDALEVKASGGVRNLDDFKAMLDAGATRVGASAGVQIMQGLEADTDY	>f2.8743	0	2.416	10.3053	1	2	1	1	262	28.6	5.05	Not Found	Not Found	High	Not Found			286631		6.43	1
	Checked	Confidence	Identifying Node	Search ID	PSM Ambiguity	Annotated Sequence	Modifications	# Protein Groups	# Proteins	Master Protein Accessions	Protein Accessions	Protein Descriptions	# Missed Cleavages	Charge	DeltaScore	DeltaCn	Rank	Search Engine Rank	m/z [Da]	MH+ [Da]	DeltaM [ppm]	Deltam/z [Da]	Activation Type	MS Order	Isolation Interference [%]	Ion Inject Time [ms]	RT [min]	First Scan	Spectrum File	Ions Matched	Annotation	XCorr	Area	Apex RT [min]	Percolator q-Value	Percolator PEP
	FALSE	High	Sequest HT (A2)	A	Unambiguous	mLDAGATRVGASAGVQImQGLEADTDY	M1(Oxidation); M18(Oxidation)	1	2	f2.8743	f2.8743; f3.11348	f2.8743; f3.11348	0	3	0.1457	0	1	1	924.768	2772.29	2.75	0.00254	CID (Collision Induced Dissociation)	MS2	0	674.64	56.0863	5983	DG009795_Gallo_32.raw	0/0		2.47			0	0.03902
	FALSE	High	Sequest HT (A2)	A	Unambiguous	mLDAGATRVGASAGVQIMQGLEADTDY	M1(Oxidation)	1	2	f2.8743	f2.8743; f3.11348	f2.8743; f3.11348	0	3	0.4924	0	1	1	919.436	2756.29	2.53	0.00233	CID (Collision Induced Dissociation)	MS2	0	346.059	69.9548	7543	DG009795_Gallo_32.raw	0/0		3.96	286631	69.85	0	0.09832
FALSE	High	Master Protein	r3.439	r3.439	VNMAKELKFSEDARQAMLRGVDKLANAVKVTIGPKGRNVVLDKEFTAPLITNDGVTIAKEIELEDPYENMGAKLVQEVANKTNEIAGDGTTTATVLAQAMIQEGLKNVTSGANPVGIRQGIDKAVGVAIEALHDISQKVENKEEIAQVGSISAADEEVGRYISEAMEKVGNDGVISIEESSGFNTELDVVEGMQFDRGYQSPYMVTDSDKMTAELENPYILITDKKISSFQDILPLLEQIVQSNRPILIVADEVEGDALTNLVLNRMRGTFTAVAVKAPGFGDRRKAMLEDLAILTGAQVITDDLGLELKEASIEMLGTATKVEVTKDNTTVVDGNGDPTNIDARVNQLKAQIEETDSDFDREKLQERLAKLAGGVAVIKVGAASETELKERKLRIEDA…	>r3.439; >f1.2457	0	2.186	3.68324	1	2	1	1	543	57.9	4.64	Not Found	High	High	Not Found		1.00414e+06	668424		7.38	1
	Checked	Confidence	Identifying Node	Search ID	PSM Ambiguity	Annotated Sequence	Modifications	# Protein Groups	# Proteins	Master Protein Accessions	Protein Accessions	Protein Descriptions	# Missed Cleavages	Charge	DeltaScore	DeltaCn	Rank	Search Engine Rank	m/z [Da]	MH+ [Da]	DeltaM [ppm]	Deltam/z [Da]	Activation Type	MS Order	Isolation Interference [%]	Ion Inject Time [ms]	RT [min]	First Scan	Spectrum File	Ions Matched	Annotation	XCorr	Area	Apex RT [min]	Percolator q-Value	Percolator PEP
	FALSE	High	Sequest HT (A2)	A	Unambiguous	VSSIEAVGDEATGVNIVLKA		1	1	r3.439	r3.439	r3.439	0	2	0.3905	0	1	1	986.536	1972.06	2.24	0.00221	CID (Collision Induced Dissociation)	MS2	0	260.455	66.2195	7098	DG009795_Gallo_32.raw	0/0		3.79	668424	66.22	0	0.006518
	FALSE	High	Sequest HT (A2)	A	Unambiguous	VSSIEAVGDEATGVNIVLKA		1	1	r3.439	r3.439	r3.439	0	2	0.4847	0	1	1	986.536	1972.06	2.49	0.00246	CID (Collision Induced Dissociation)	MS2	0	363.397	66.0524	7083	DG009790_Gallo_30.raw	0/0		3.59	1.00414e+06	66.09	0	0.006763
FALSE	High	Master Protein	f1.23386	f1.23386	MYNGGAYMKNDKKKIGIFTFFLLMVLTIALKTYFAYYVDLSLGVKGLTQNLILLLNPYSLVALILSVFLFFKGRKAYWFMFIGGFLITFLLYANVVYFRFFSDFITFSTLNQVGNVDSMGGAVSASFKWHDFVYFIDTIVYLFILIFKQKWLSKNVFHKKFIPVVMATAIALFFLNLAFAETDRPELLTRTFDHKYLVKYLGPYNFTVYDGVKTIQNNQQKALASEDDLTEVLNYSKQKNTEPNVEYFGKAKGKNVIKIHLESFQTFLINKKINGEEVTPFLNQLSSGQNDFRYYPNFYHQTGQGKTSDAEFTMDNSLYGLPQGSAFSLKGDNTYQSLPAILHQKQNYTTSVMHGDYKTFWNRDQVYRHFGIDKFYDATYYDMSPENQENLGLKDKEFF…	>f1.23386; >r2.27750	0	2.042	4.60123	1	1	1	1	652	75.1	5.77	Not Found	High	Not Found	Not Found		1.21983e+06			5.72	1
	Checked	Confidence	Identifying Node	Search ID	PSM Ambiguity	Annotated Sequence	Modifications	# Protein Groups	# Proteins	Master Protein Accessions	Protein Accessions	Protein Descriptions	# Missed Cleavages	Charge	DeltaScore	DeltaCn	Rank	Search Engine Rank	m/z [Da]	MH+ [Da]	DeltaM [ppm]	Deltam/z [Da]	Activation Type	MS Order	Isolation Interference [%]	Ion Inject Time [ms]	RT [min]	First Scan	Spectrum File	Ions Matched	Annotation	XCorr	Area	Apex RT [min]	Percolator q-Value	Percolator PEP
	FALSE	High	Sequest HT (A2)	A	Unambiguous	LKAPGVEPEVDETYAGQVDVmPTLLHLmGI	M21(Oxidation); M28(Oxidation)	1	1	f1.23386	f1.23386	f1.23386	0	3	0.4528	0	1	1	1085.55	3254.64	1.68	0.00182	CID (Collision Induced Dissociation)	MS2	0	433.441	75.5547	8403	DG009790_Gallo_30.raw	0/0		5.72	1.21983e+06	75.52	0	0.009073
FALSE	High	Master Protein	f1.19144	f1.19144	YDANDIKKWNKERCILKKKTLIILSVVGVLLLVGIALLVRAFGQGNHDDNKGYDTYKVQKESPIRITGKVSPNSIKTYQNNSQVGDFVSVQVEDGQYVQQGTPLINYDIDPTQRQKLVDQINQANAKGDQQQIDKAIKQLNRYDGQIYNSVNATFSGTVAVDNSTNVSEGEPILRLISNEPEIQTTVSEFDLDKIKVGNDVKIKVTSNGKTGQGKITRIGQLPTSYDSQSASQSGGGEAIGGMEGDEEGQSSLSTNNPIDSNPSLGKGNETSKYQVMIGELDFDVKNGYTVEAQIPLDALKIPKSSLTKDDKVFVVDDKNIAHKRTIQYDENNGDIIIKKGLKANDKIIKNPDNKVKDGKKVEVSE	>f1.19144	0	1.883	7.10383	1	1	1	1	366	40.1	5.94	Not Found	Not Found	High	Not Found			444679		3.32	1
	Checked	Confidence	Identifying Node	Search ID	PSM Ambiguity	Annotated Sequence	Modifications	# Protein Groups	# Proteins	Master Protein Accessions	Protein Accessions	Protein Descriptions	# Missed Cleavages	Charge	DeltaScore	DeltaCn	Rank	Search Engine Rank	m/z [Da]	MH+ [Da]	DeltaM [ppm]	Deltam/z [Da]	Activation Type	MS Order	Isolation Interference [%]	Ion Inject Time [ms]	RT [min]	First Scan	Spectrum File	Ions Matched	Annotation	XCorr	Area	Apex RT [min]	Percolator q-Value	Percolator PEP
	FALSE	High	Sequest HT (A2)	A	Unambiguous	VNATFSGTVAVDNSTNVSEGEPILRL		1	2	f1.19144	f1.19144; f3.11791	f1.19144; f3.11791	0	3	0.3554	0	1	1	897.462	2690.37	3.53	0.00316	CID (Collision Induced Dissociation)	MS2	0	612.711	71.6696	7744	DG009795_Gallo_32.raw	0/0		3.32	444679	71.69	0	0.0131
FALSE	High	Master Protein	f2.5106	f2.5106	LCLKIRRNLSMSKVIGIDLGTTNSCVAVLEGDEPKVIQNPEGARTTPSVVAFKNGETQVGEVAKRQAITNPNTIQSIKRHMGTQHKENIEGKDYTPQEISAMILQNLKNTAESYLGEKVEKAVITVPAYFNDSERQATKDAGKIAGLEVERIINEPTAAALAYGLDKTDKDEKVLVFDLGGGTFDVSILELGDGVFEVLATAGDNKLGGDDFDQVIIDHLVNEFKSENGVDLSKDKMALQRLKDAAEKAKKDLSGVSSTQISLPFISAGEAGPLHLETTLSRAKFEELSHELIQKTMGPTRQAMKDAGLSNSDIDEVILVGGSTRIPAVQEAIKKEIGKEPNKGVNPDEVVAMGAAIQGGVITGDVKDVVLLDVTPLSLGIEIMGGRMNTLIERNTTIP…	>f2.5106	0	1.875	2.58481	1	2	1	1	619	67.3	4.77	High	Not Found	High	Not Found	622715		292691		5.54	1
	Checked	Confidence	Identifying Node	Search ID	PSM Ambiguity	Annotated Sequence	Modifications	# Protein Groups	# Proteins	Master Protein Accessions	Protein Accessions	Protein Descriptions	# Missed Cleavages	Charge	DeltaScore	DeltaCn	Rank	Search Engine Rank	m/z [Da]	MH+ [Da]	DeltaM [ppm]	Deltam/z [Da]	Activation Type	MS Order	Isolation Interference [%]	Ion Inject Time [ms]	RT [min]	First Scan	Spectrum File	Ions Matched	Annotation	XCorr	Area	Apex RT [min]	Percolator q-Value	Percolator PEP
	FALSE	High	Sequest HT (A2)	A	Unambiguous	IINEPTAAALAYGLDK		1	2	f2.5106	r3.5362; f2.5106	r3.5362; f2.5106	0	2	0.3443	0	1	1	830.455	1659.9	4.25	0.00353	CID (Collision Induced Dissociation)	MS2	0	983.186	58.459	6630	DG009785_Gallo_26.raw	0/0		2.73	622715	58.47	0	0.01335
	FALSE	High	Sequest HT (A2)	A	Unambiguous	IINEPTAAALAYGLDK		1	2	f2.5106	r3.5362; f2.5106	r3.5362; f2.5106	0	2	0.4021	0	1	1	830.455	1659.9	4.03	0.00335	CID (Collision Induced Dissociation)	MS2	0	1000	58.4466	6246	DG009795_Gallo_32.raw	0/0		2.81	292691	58.43	0.005932	0.1847
FALSE	High	Master Protein	f3.796	f3.796	IEGIYMKKVLLAIVVVFFATAIITPFAKAYTLTPVQIAQQYGYPVDERYQPEGLINMSETGQILYDYKSHTKWDPASMTKLMTMYLTLKAVKSGDLSLDDQIPITQEHYRMSTLPELSDTKLYPGETYTVAELLQIAVSASSNSAALILAKEVSGNMSDFVDLMNQTAKELNMKDTHYVNPTGAENRLLQDFVPKRYQNESAAVTTPHDYAILAQHAVQDTPKILHFTKQIAPTQHGVTYYTFNDLLEGGNMSIEGTDGLKTGSSDLADYNNSLTTKRGKFRIIHIIMGAGDYVNLGGEKQRNMMSASTINNVFQYYEYKKVLSKGVQTINGKKYYINDDLYDVVPKGFKDYHFTIERGHVHIDYDRQFINDHYGPPSVKIERPFIHDTKSVVITSWKE…	>f3.796	0	1.647	8.85781	1	1	1	1	429	48.5	6.93	Not Found	Not Found	High	Not Found			419398		3.04	1
	Checked	Confidence	Identifying Node	Search ID	PSM Ambiguity	Annotated Sequence	Modifications	# Protein Groups	# Proteins	Master Protein Accessions	Protein Accessions	Protein Descriptions	# Missed Cleavages	Charge	DeltaScore	DeltaCn	Rank	Search Engine Rank	m/z [Da]	MH+ [Da]	DeltaM [ppm]	Deltam/z [Da]	Activation Type	MS Order	Isolation Interference [%]	Ion Inject Time [ms]	RT [min]	First Scan	Spectrum File	Ions Matched	Annotation	XCorr	Area	Apex RT [min]	Percolator q-Value	Percolator PEP
	FALSE	High	Sequest HT (A2)	A	Unambiguous	SSNSAALILAKEVSGNmSDFVDLmNQTAKELNmKDTHY	M17(Oxidation); M24(Oxidation); M33(Oxidation)	1	1	f3.796	f3.796	f3.796	0	4	0.1513	0	1	1	1056	4220.99	2.71	0.00286	CID (Collision Induced Dissociation)	MS2	0	582.156	67.4328	7249	DG009795_Gallo_32.raw	0/0		3.04	419398	67.35	0	0.02252
FALSE	High	Master Protein	f2.9782	f2.9782	SIMQYKLGGLIFMKKLTTATIATLGLVTAGIAIQGEADAAEQAQWITSYNTTYSEMTHDYVTIDNLGNRHHTLDGNWDPSMFQNDAYYSQYVDEEGHTHYIYYLTDNDYSLNQSHESIQANGYQGYIGQSDYVTPYQSSYNSESYNADENNTTHWSANNTNQVGYGTQNGNNTASQAPTVQAPTTNGSQNDGSANIKPASSKATGSAGWLNKYPQWQPYGQYHGGGAHYGVDYGMPVGTPVYSFTDGRVIDSGWSNYGGGNQITIQEAGTNNYQWYMHLSQLNVKKGDTVSEGQQIGLSGNTGNSTGPHLHFQRMQGGIGNQYAVNPTGYLASK	>f2.9782; >r2.27077	0	1.608	4.79042	1	2	1	1	334	36.5	5.33	Not Found	High	High	Not Found			281008		6.77	1
	Checked	Confidence	Identifying Node	Search ID	PSM Ambiguity	Annotated Sequence	Modifications	# Protein Groups	# Proteins	Master Protein Accessions	Protein Accessions	Protein Descriptions	# Missed Cleavages	Charge	DeltaScore	DeltaCn	Rank	Search Engine Rank	m/z [Da]	MH+ [Da]	DeltaM [ppm]	Deltam/z [Da]	Activation Type	MS Order	Isolation Interference [%]	Ion Inject Time [ms]	RT [min]	First Scan	Spectrum File	Ions Matched	Annotation	XCorr	Area	Apex RT [min]	Percolator q-Value	Percolator PEP
	FALSE	High	Sequest HT (A2)	A	Unambiguous	LGLVTAGIAIQGEADA		1	1	f2.9782	f2.9782	f2.9782	0	2	0.5115	0	1	1	749.911	1498.81	1.99	0.00149	CID (Collision Induced Dissociation)	MS2	0	986.31	69.0938	7442	DG009795_Gallo_32.raw	0/0		3.91	281008	69.08	0	0.02468
	FALSE	High	Sequest HT (A2)	A	Unambiguous	LGLVTAGIAIQGEADA		1	1	f2.9782	f2.9782	f2.9782	0	2	0.2822	0	1	1	749.909	1498.81	-0.04	-3e-05	CID (Collision Induced Dissociation)	MS2	47.201	767.951	69.1102	7494	DG009790_Gallo_30.raw	0/0		2.87			0.003364	0.1377
FALSE	High	Master Protein	r2.18996	r2.18996	EVSIMNKRENKYSIRKFSIGASSIMIASLFFISTGQAQASETDSVTSSETNPQTETTTSNTNDVVNEQTSDLHTSEDPETGSTTDETTEKTESVETHVTDKPTTEDESVETPSTETTAESNQPLDTSDNTAKNDEQLPKSQDAPVSNETAKDSNPSQTLQSSDEHPNTTEAPTRDTSTSTEDQKTKEQDLSHPKQNESVTSSLETQQQPDIDDTKQTVETSSQQNTTVEAEPKAKEPLHEITSSEPKAKDNVKVPEALNTNKSSQPSSDDNSSPDKDLASLKDSNAATTQSKTNTRDAEKLQEQPSQKAKKGFYKNKYPIILVHGFNGFTDDINPSVLAHYWGGDKLNIRDDLEKNGYETHEASISAFGSNYDRAVELYYYIKGGRVDYGAAHAQKYGH…	>r2.18996	0	1.491	2.1645	1	1	1	1	693	76.8	5.03	Not Found	High	Not Found	Not Found		554313			2.89	1
	Checked	Confidence	Identifying Node	Search ID	PSM Ambiguity	Annotated Sequence	Modifications	# Protein Groups	# Proteins	Master Protein Accessions	Protein Accessions	Protein Descriptions	# Missed Cleavages	Charge	DeltaScore	DeltaCn	Rank	Search Engine Rank	m/z [Da]	MH+ [Da]	DeltaM [ppm]	Deltam/z [Da]	Activation Type	MS Order	Isolation Interference [%]	Ion Inject Time [ms]	RT [min]	First Scan	Spectrum File	Ions Matched	Annotation	XCorr	Area	Apex RT [min]	Percolator q-Value	Percolator PEP
	FALSE	High	Sequest HT (A2)	A	Unambiguous	HNIAEDLVAAEKVTS		1	2	r2.18996	r3.15322; r2.18996	r3.15322; r2.18996	0	2	0.3599	0	1	1	798.917	1596.83	2.77	0.00221	CID (Collision Induced Dissociation)	MS2	0	502.869	49.5072	5251	DG009790_Gallo_30.raw	0/0		2.89	554313	49.47	0	0.03227
FALSE	High	Master Protein	f1.22901	f1.22901	GPRMTQKKGTSNASTKKSNKKKNKNIKRTIIKVISFVVLAFVILALLCVLLFAYYAWKAPAFNESKLQDPSPARIYDKDDQLVKTLDNGARREHVDLDKVPDTMKNAVLATEDNRFYDHGALDYKRLFGAVIKNVTGGFGSQGASTLTQQVVKRTFLTDQKSIERKAQEAYLSYRLEQEYSKDEIFEMYLNKIYYSDGVYGIKAAAKYYFDKDLDELNLAESAYLAGLPQVPNTYNIYDHPEEAEKRKDTVLYLMAYHNRISEKEKEEAQNTPITTNLVERTNEERQIKPDDSTAQYDSYVNFIKQELMNNPEFKGKNLSDVLNSGIKIYTNMDRNIQDALQSRIDNGGYYKNDDQLVGSTIVDSETGGLVAISGGRNYKDVVERNQATDVHPTGSTLK…	>f1.22901; >r3.40241	0	1.434	3.38753	1	1	1	1	738	82.1	5.85	Not Found	High	Not Found	Not Found		245298			3.07	1
	Checked	Confidence	Identifying Node	Search ID	PSM Ambiguity	Annotated Sequence	Modifications	# Protein Groups	# Proteins	Master Protein Accessions	Protein Accessions	Protein Descriptions	# Missed Cleavages	Charge	DeltaScore	DeltaCn	Rank	Search Engine Rank	m/z [Da]	MH+ [Da]	DeltaM [ppm]	Deltam/z [Da]	Activation Type	MS Order	Isolation Interference [%]	Ion Inject Time [ms]	RT [min]	First Scan	Spectrum File	Ions Matched	Annotation	XCorr	Area	Apex RT [min]	Percolator q-Value	Percolator PEP
	FALSE	High	Sequest HT (A2)	A	Unambiguous	ITEILKGTFEAYGSAYGNDVSGVNL		1	1	f1.22901	f1.22901	f1.22901	0	2	0.4886	0	1	1	1309.66	2618.31	3.8	0.00498	CID (Collision Induced Dissociation)	MS2	0	330.886	72.3956	7944	DG009790_Gallo_30.raw	0/0		3.07	245298	72.32	0	0.03685
FALSE	High	Master Protein	f3.37008	f3.37008	RLRFVTGLVTSRSPCSGTRSVGCWPVXXXXXXXXXXXXIGPYSMISRTLSVPTANISSPSSKVRYWPGLEAVALPGFSMDSAMIHLGSVTVRLRLGARPFASHFHQAGHLIDTQNMLNLQQRDKXXXXXXXXXXXXLVVRKELAVVGIQQNLPVLFYRNIQLLRDFLLRGSAAQHLFNLMHGSRNLASISSDATWCPVPAAKLIKHGSTDALYCIRGKGGTLEXXXXXXXXXXXX	>f3.37008	0	1.406	9.3617	1	1	1	1	235	25.7	10.49	Not Found	High	Not Found	Not Found		1.00679e+06			2.69	1
	Checked	Confidence	Identifying Node	Search ID	PSM Ambiguity	Annotated Sequence	Modifications	# Protein Groups	# Proteins	Master Protein Accessions	Protein Accessions	Protein Descriptions	# Missed Cleavages	Charge	DeltaScore	DeltaCn	Rank	Search Engine Rank	m/z [Da]	MH+ [Da]	DeltaM [ppm]	Deltam/z [Da]	Activation Type	MS Order	Isolation Interference [%]	Ion Inject Time [ms]	RT [min]	First Scan	Spectrum File	Ions Matched	Annotation	XCorr	Area	Apex RT [min]	Percolator q-Value	Percolator PEP
	FALSE	High	Sequest HT (A2)	A	Unambiguous	SmISRTLSVPTANISSPSSKVR	M2(Oxidation)	1	1	f3.37008	f3.37008	f3.37008	0	3	0.1004	0	1	1	778.757	2334.26	5.19	0.00404	CID (Collision Induced Dissociation)	MS2	0	1000	47.5449	5043	DG009790_Gallo_30.raw	0/0		2.69	1.00679e+06	47.62	0	0.03927
FALSE	High	Master Protein	f1.12441	f1.12441	KKCSIMMGKNTSMRVSLLYRRDYMSKKTTKSRMDFLPNRANQYAIRRFTVGTASILIGATLVLGVHHDAQAAEEDSTSLNSENSDATQSETSSVESPETQTTEQSVEKTQEVPTEETSQEETSTINESAEEVPTEEASTEQSSNASTEEKSTEQPTKTPTEEPSPTPSEEPQVDEKDSVDSTQNTTEETAKSNEASTENTSVEPPQTNDVPTDHPSTSEPPQNEINLDELDQQQKEDLEAYKRSYQETDNKADVFNTILKDNGFSDEQTKDIINQMDLGNLNQLSSEEALNQLIYEALQYAQKNQQPQNFAVLPTATRDAREESVNTAVPLAAEAQGNNVNDKVNFENLAIIDDNGDTTIRPNNGEGFVVRSSFDVDNSVNSGDYFTVKLPNTVVTNDH…	>f1.12441	0	1.335	1.20275	1	1	1	1	1164	127.5	4.23	Not Found	High	Not Found	Not Found					2.4	1
	Checked	Confidence	Identifying Node	Search ID	PSM Ambiguity	Annotated Sequence	Modifications	# Protein Groups	# Proteins	Master Protein Accessions	Protein Accessions	Protein Descriptions	# Missed Cleavages	Charge	DeltaScore	DeltaCn	Rank	Search Engine Rank	m/z [Da]	MH+ [Da]	DeltaM [ppm]	Deltam/z [Da]	Activation Type	MS Order	Isolation Interference [%]	Ion Inject Time [ms]	RT [min]	First Scan	Spectrum File	Ions Matched	Annotation	XCorr	Area	Apex RT [min]	Percolator q-Value	Percolator PEP
	FALSE	High	Sequest HT (A2)	A	Unambiguous	ILKDNGFSDEQTKD		1	2	f1.12441	f1.12441; f2.10543	f1.12441; f2.10543	0	2	0.2917	0	1	1	805.391	1609.78	3.2	0.00258	CID (Collision Induced Dissociation)	MS2	0	1000	18.4962	2007	DG009790_Gallo_30.raw	0/0		2.4			0	0.04623
FALSE	High	Master Protein	f2.7353	f2.7353	SNSPLSNPIAKEPILFTSKVPNGKERPLISIWFKRSEIRSLMIAPVPPPIINKRIVILILS	>f2.7353	0	1.31	62.2951	1	1	1	1	61	6.8	11.05	High	Not Found	Not Found	Not Found					0	1
	Checked	Confidence	Identifying Node	Search ID	PSM Ambiguity	Annotated Sequence	Modifications	# Protein Groups	# Proteins	Master Protein Accessions	Protein Accessions	Protein Descriptions	# Missed Cleavages	Charge	DeltaScore	DeltaCn	Rank	Search Engine Rank	m/z [Da]	MH+ [Da]	DeltaM [ppm]	Deltam/z [Da]	Activation Type	MS Order	Isolation Interference [%]	Ion Inject Time [ms]	RT [min]	First Scan	Spectrum File	Ions Matched	Annotation	XCorr	Area	Apex RT [min]	Percolator q-Value	Percolator PEP
	FALSE	High	Sequest HT (A2)	A	Unambiguous	GKERPLISIWFKRSEIRSLmIAPVPPPIINKRIVILIL	M20(Oxidation)	1	1	f2.7353	f2.7353	f2.7353	0	6	0.062	0	1	1	737.948	4422.65	-3.13	-0.00231	CID (Collision Induced Dissociation)	MS2	0	392.594	80.3541	9620	DG009785_Gallo_26.raw	0/0		2.42			0	0.04898
FALSE	High	Master Protein	f2.36615	f2.36615	IPALISVARATIDTASALLPSSPWPSMVMVPLLTSSAARLPLASNCGLPXXXXXXXXXXXXSCTSATVSR	>f2.36615	0	1.2	34.2857	1	1	1	1	70	7.2	8.66	Not Found	Not Found	Not Found	High				92361.8	2.32	1
	Checked	Confidence	Identifying Node	Search ID	PSM Ambiguity	Annotated Sequence	Modifications	# Protein Groups	# Proteins	Master Protein Accessions	Protein Accessions	Protein Descriptions	# Missed Cleavages	Charge	DeltaScore	DeltaCn	Rank	Search Engine Rank	m/z [Da]	MH+ [Da]	DeltaM [ppm]	Deltam/z [Da]	Activation Type	MS Order	Isolation Interference [%]	Ion Inject Time [ms]	RT [min]	First Scan	Spectrum File	Ions Matched	Annotation	XCorr	Area	Apex RT [min]	Percolator q-Value	Percolator PEP
	FALSE	High	Sequest HT (A2)	A	Unambiguous	RATIDTASALLPSSPWPSMVmVPL	M21(Oxidation)	1	1	f2.36615	f2.36615	f2.36615	0	3	0.0948	0	1	1	852.773	2556.3	-6.66	-0.00568	CID (Collision Induced Dissociation)	MS2	100	1000	71.4239	7631	DG009800_Gallo_36.raw	0/0		2.32	92361.8	71.41	0	0.06304
FALSE	High	Master Protein	f1.2965	f1.2965	KTNFKGGFVVMAEITHEQVEYIANLARLNVTEEESKSLQGTLAGILDFCHQIDNVDTENVKPTNHVLDLQNVLRDDVAVAGLPQEKALTNAKEVEAGQFKVPAVMNEEDA	>f1.2965; >r1.1076	0	1.119	31.8182	1	1	1	1	110	12.1	4.64	Not Found	High	Not Found	Not Found		5.54945e+06			0	1
	Checked	Confidence	Identifying Node	Search ID	PSM Ambiguity	Annotated Sequence	Modifications	# Protein Groups	# Proteins	Master Protein Accessions	Protein Accessions	Protein Descriptions	# Missed Cleavages	Charge	DeltaScore	DeltaCn	Rank	Search Engine Rank	m/z [Da]	MH+ [Da]	DeltaM [ppm]	Deltam/z [Da]	Activation Type	MS Order	Isolation Interference [%]	Ion Inject Time [ms]	RT [min]	First Scan	Spectrum File	Ions Matched	Annotation	XCorr	Area	Apex RT [min]	Percolator q-Value	Percolator PEP
	FALSE	High	Sequest HT (A2)	A	Selected	DVAVAGLPQEKALTNAKEVEAGQFKVPAVmNEEDA	M30(Oxidation)	1	1	f1.2965	f1.2965	f1.2965	0	4	0.0221	0	1	1	921.968	3684.85	2.49	0.00229	CID (Collision Induced Dissociation)	MS2	17.071	863.232	59.5656	6339	DG009790_Gallo_30.raw	0/0		1.81	5.54945e+06	59.61	0	0.07605
FALSE	High	Master Protein	f2.9798	f2.9798	GVIQVVEVKDLQALKEANTENNEIIVTENIALEGEFVLQPGVTLKGQDATIEISGEGQLVGLSTNNTIENITLRTNKDNDAVYFDGTGAQGKYVLNNVTTYGAVTLIADDAKGDIQVDVENVDVVEANVTHKEEGPQGFGVTVIQGGITIWNRTPDIRFDAEVREVSVGREGEPVNGSGVFVSGTDDAKIYSKLITTNNVYTNGLLTQGVANRISGGVFTVTNAYVDRVENKGLTKTYGFNDMVLDNWGYVKEWVVKDEVQSEGTSGIGFVNFGDIDALDIQAPIRTKGTGARGINNYDGTIKKLDLDLIETHGDGAVGIQISKPVGRITVHKDIKTYGGTGESLVKGVIKQLSAIGISILDGAEVESLEVKGNVHTHGKDITPVQNEGTVRDGLKILG…	>f2.9798	0	1.002	7.63547	1	2	1	1	406	43.4	4.75	Not Found	High	High	Not Found		1.96811e+06	879449		7.32	1
	Checked	Confidence	Identifying Node	Search ID	PSM Ambiguity	Annotated Sequence	Modifications	# Protein Groups	# Proteins	Master Protein Accessions	Protein Accessions	Protein Descriptions	# Missed Cleavages	Charge	DeltaScore	DeltaCn	Rank	Search Engine Rank	m/z [Da]	MH+ [Da]	DeltaM [ppm]	Deltam/z [Da]	Activation Type	MS Order	Isolation Interference [%]	Ion Inject Time [ms]	RT [min]	First Scan	Spectrum File	Ions Matched	Annotation	XCorr	Area	Apex RT [min]	Percolator q-Value	Percolator PEP
	FALSE	High	Sequest HT (A2)	A	Unambiguous	VEVKDLQALKEANTENNEIIVTENIALEGEF		1	2	f2.9798	r1.26989; f2.9798	r1.26989; f2.9798	0	3	0.1486	0	1	1	1158.26	3472.77	1.2	0.00139	CID (Collision Induced Dissociation)	MS2	0	510.335	74.6685	8120	DG009795_Gallo_32.raw	0/0		2.96	879449	74.63	0	0.09944
	FALSE	High	Sequest HT (A2)	A	Unambiguous	VEVKDLQALKEANTENNEIIVTENIALEGEF		1	2	f2.9798	r1.26989; f2.9798	r1.26989; f2.9798	0	3	0.4483	0	1	1	1158.26	3472.78	2.36	0.00274	CID (Collision Induced Dissociation)	MS2	0	482.638	74.4839	8233	DG009790_Gallo_30.raw	0/0		4.35	1.96811e+06	74.4	0.005932	0.1662
FALSE	Medium	Master Protein	f1.16767	f1.16767	GMSDMNNTNEKHLNKSSLIGLVIGSMIGGGAFNIISDMGKEAGGLALIIGWVITAIGMIALAFVFQILTNARPDLDGGIYSYARAGFGDFIGFCSAWGYWFAAFLGNVAYATLLMSAVGNFFPIFQGGNTLPSIIVASILLWAVHFLILKGVETAAFINSIVTVAKLIPIFLVIVCMIVVFHFDTFMAGFYGTEQHAGLFNWGSILEQVKSTMLVTAWVFTGIEGAVVFSGRAKFKKDVGTATVIGLTSVLIIYFLMTVLAQGVIHQSDISKLQDPSMADVLSQIVGPWGAVFVNLGLIISVLGAWLGWTLLAGELPFIVAQNKLFPNWFAKANINGAPVNALLITNILVQLFLISMIFTDSAYQFAYSLASSAVLIPYMLSAFYLFKYNIIQTEHTIR…	>f1.16767	0.019	0.96	2.30126	1	1	1	1	478	52.1	7.59	Not Found	High	Not Found	Not Found		614680			2.43	1
	Checked	Confidence	Identifying Node	Search ID	PSM Ambiguity	Annotated Sequence	Modifications	# Protein Groups	# Proteins	Master Protein Accessions	Protein Accessions	Protein Descriptions	# Missed Cleavages	Charge	DeltaScore	DeltaCn	Rank	Search Engine Rank	m/z [Da]	MH+ [Da]	DeltaM [ppm]	Deltam/z [Da]	Activation Type	MS Order	Isolation Interference [%]	Ion Inject Time [ms]	RT [min]	First Scan	Spectrum File	Ions Matched	Annotation	XCorr	Area	Apex RT [min]	Percolator q-Value	Percolator PEP
	FALSE	High	Sequest HT (A2)	A	Unambiguous	AVIGIVKILTH		1	2	f1.16767	f1.16767; r3.20304	f1.16767; r3.20304	0	2	0.3128	0	1	1	582.38	1163.75	1.97	0.00114	CID (Collision Induced Dissociation)	MS2	18.5136	300.052	61.1656	6509	DG009790_Gallo_30.raw	0/0		2.43	614680	61.17	0.003364	0.1097
FALSE	Medium	Master Protein	r2.4480	r2.4480	RQRAEXXXXXXXXXXXXXXXXXXXXXLLRRQEPVAFRAGRRAGLGAGAGQHQRQRSQHIASGHD	>r2.4480	0.019	0.912	25	1	1	1	1	64	7.1	12.1	Not Found	Not Found	Not Found	High				720310	1.67	1
	Checked	Confidence	Identifying Node	Search ID	PSM Ambiguity	Annotated Sequence	Modifications	# Protein Groups	# Proteins	Master Protein Accessions	Protein Accessions	Protein Descriptions	# Missed Cleavages	Charge	DeltaScore	DeltaCn	Rank	Search Engine Rank	m/z [Da]	MH+ [Da]	DeltaM [ppm]	Deltam/z [Da]	Activation Type	MS Order	Isolation Interference [%]	Ion Inject Time [ms]	RT [min]	First Scan	Spectrum File	Ions Matched	Annotation	XCorr	Area	Apex RT [min]	Percolator q-Value	Percolator PEP
	FALSE	High	Sequest HT (A2)	A	Unambiguous	RAGRRAGLGAGAGQHQ		1	1	r2.4480	r2.4480	r2.4480	0	2	0.0599	0	1	1	781.919	1562.83	-4.14	-0.00323	CID (Collision Induced Dissociation)	MS2	0	1000	40.5162	4399	DG009800_Gallo_36.raw	0/0		1.67	720310	40.58	0.003364	0.1226
FALSE	Medium	Master Protein	r3.7995	r3.7995	RTSLNQCXXXXXXXXXXXXXXXXXXXXXDCVGRRTVGGIRTRPRHRRSAGRFRGSRSSACRFPPPGCTPASTPGSSCASFPVLLRSMDSGTAPPAPGDAGGSRRRCRRRFQCVTFXXXXXXXXXXXXNXXXXXXXXX	>r3.7995	0.019	0.837	31.3869	1	1	1	1	137	14.9	11.87	Not Found	Not Found	High	Not Found			141953		3.2	1
	Checked	Confidence	Identifying Node	Search ID	PSM Ambiguity	Annotated Sequence	Modifications	# Protein Groups	# Proteins	Master Protein Accessions	Protein Accessions	Protein Descriptions	# Missed Cleavages	Charge	DeltaScore	DeltaCn	Rank	Search Engine Rank	m/z [Da]	MH+ [Da]	DeltaM [ppm]	Deltam/z [Da]	Activation Type	MS Order	Isolation Interference [%]	Ion Inject Time [ms]	RT [min]	First Scan	Spectrum File	Ions Matched	Annotation	XCorr	Area	Apex RT [min]	Percolator q-Value	Percolator PEP
	FALSE	High	Sequest HT (A2)	A	Unambiguous	HRRSAGRFRGSRSSACRFPPPGCTPASTPGSSCASFPVLLRSm	M43(Oxidation)	1	1	r3.7995	r3.7995	r3.7995	0	5	0.1844	0	1	1	911.04	4551.17	-11.11	-0.01011	CID (Collision Induced Dissociation)	MS2	64.7295	1000	78.4774	8568	DG009795_Gallo_32.raw	0/0		3.2	141953	78.55	0.003364	0.1454
FALSE	Medium	Master Protein	r3.23615	r3.23615	IEYVKEFTQMMELSEIKRYIERYTLKLEQLRGSL	>r3.23615; >r3.27293	0.019	0.815	32.3529	1	1	1	1	34	4.2	6.6	Not Found	High	Not Found	Not Found		5.39773e+06			2.41	1
	Checked	Confidence	Identifying Node	Search ID	PSM Ambiguity	Annotated Sequence	Modifications	# Protein Groups	# Proteins	Master Protein Accessions	Protein Accessions	Protein Descriptions	# Missed Cleavages	Charge	DeltaScore	DeltaCn	Rank	Search Engine Rank	m/z [Da]	MH+ [Da]	DeltaM [ppm]	Deltam/z [Da]	Activation Type	MS Order	Isolation Interference [%]	Ion Inject Time [ms]	RT [min]	First Scan	Spectrum File	Ions Matched	Annotation	XCorr	Area	Apex RT [min]	Percolator q-Value	Percolator PEP
	FALSE	High	Sequest HT (A2)	A	Unambiguous	TLKLEQLRGSL		1	1	r3.23615	r3.23615	r3.23615	0	3	0.0913	0	1	1	419.923	1257.75	0.67	0.00028	HCD (High Energy Collision Dissociation)	MS2	0	927.691	45.1969	4783	DG009790_Gallo_30.raw	0/0		2.41	5.39773e+06	45.29	0.003364	0.1532

## Sheet: Fig.2E
Predicted protein	Accession	Sequence	Coverage	# Peptides	# PSMs	MW [kDa]	nonactive (26)	Nonactive (30)	Active (32)	nonactive (36)
Complement inhibitor	f3.28776	MNIKNFIITSTLATVLS….........KSALKSNDFYQMSRAKYELQKIYDEIDEALLEE	56.1404	23	62	12.8	945027	8.83447e+06	5.115e+06	1.70223e+06
Confidence	Identifying Node	PSM Ambiguity	# Proteins	Master Protein Accessions	Protein Accessions	DeltaScore	DeltaM [ppm]	Deltam/z [Da]	Activation Type	MS Order	RT [min]	First Scan	Spectrum File	Ions Matched	Annotation	XCorr	Area	Apex RT [min]	Percolator q-Value	Percolator PEP
High	Sequest HT (A2)	Unambiguous	2	f3.28776	r1.19284; f3.28776	0.159	1.26	0.00074	CID (Collision Induced Dissociation)	MS2	57.3291	6120	DG009795_Gallo_32.raw	0/0		2.83	8.45585e+06	57.61	0	0.1066
High	Sequest HT (A2)	Unambiguous	2	f3.28776	r1.19284; f3.28776	0.3961	2.59	0.00252	CID (Collision Induced Dissociation)	MS2	77.3721	8742	DG009790_Gallo_30.raw	0/0		4.14	1.32422e+07	77.52	0	0.008941
High	Sequest HT (A2)	Unambiguous	2	f3.28776	r1.19284; f3.28776	0.4138	2.44	0.00169	CID (Collision Induced Dissociation)	MS2	76.639	8132	DG009800_Gallo_36.raw	0/0		3.48	803017	76.71	0	0.001096
High	Sequest HT (A2)	Unambiguous	2	f3.28776	r1.19284; f3.28776	0.4229	3.06	0.00211	CID (Collision Induced Dissociation)	MS2	76.3876	8560	DG009790_Gallo_30.raw	0/0		3.76	1.67944e+07	76.49	0	0.001084
High	Sequest HT (A2)	Unambiguous	2	f3.28776	r1.19284; f3.28776	0.1089	4.15	0.00385	CID (Collision Induced Dissociation)	MS2	74.9566	8303	DG009790_Gallo_30.raw	0/0		2.48			0	0.01393
High	Sequest HT (A2)	Unambiguous	2	f3.28776	r1.19284; f3.28776	0.4533	0.08	6e-05	CID (Collision Induced Dissociation)	MS2	79.0361	8696	DG009795_Gallo_32.raw	0/0		3.53			0	0.005508
High	Sequest HT (A2)	Unambiguous	2	f3.28776	r1.19284; f3.28776	0.2232	3.27	0.00319	CID (Collision Induced Dissociation)	MS2	78.2156	8541	DG009795_Gallo_32.raw	0/0		2.33	54984.4	78.19	0	0.01032
High	Sequest HT (A2)	Unambiguous	2	f3.28776	r1.19284; f3.28776	0.0537	2.61	0.00153	CID (Collision Induced Dissociation)	MS2	60.1247	6525	DG009800_Gallo_36.raw	0/0		2.42	135006	60.44	0	0.08338
High	Sequest HT (A2)	Unambiguous	2	f3.28776	r1.19284; f3.28776	0.235	1.67	0.00098	CID (Collision Induced Dissociation)	MS2	58.9098	6403	DG009800_Gallo_36.raw	0/0		2.34			0	0.07099
High	Sequest HT (A2)	Unambiguous	2	f3.28776	r1.19284; f3.28776	0.0826	2.61	0.00153	CID (Collision Induced Dissociation)	MS2	57.3726	6252	DG009800_Gallo_36.raw	0/0		2.3	4.19199e+06	57.8	0	0.04303
High	Sequest HT (A2)	Unambiguous	2	f3.28776	r1.19284; f3.28776	0.2677	2.4	0.00234	CID (Collision Induced Dissociation)	MS2	77.6313	8487	DG009795_Gallo_32.raw	0/0		2.69	1.13458e+06	77.81	0	0.05768
High	Sequest HT (A2)	Unambiguous	2	f3.28776	r1.19284; f3.28776	0.4006	2.56	0.00197	CID (Collision Induced Dissociation)	MS2	73.2722	7951	DG009795_Gallo_32.raw	0/0		3.12	292036	73.27	0	0.007815
High	Sequest HT (A2)	Unambiguous	2	f3.28776	r1.19284; f3.28776	0.3697	1.53	0.00098	CID (Collision Induced Dissociation)	MS2	72.8295	7891	DG009795_Gallo_32.raw	0/0		2.84	1.61155e+06	72.89	0	0.02495
High	Sequest HT (A2)	Selected	2	f3.28776	r1.19284; f3.28776	0.0388	2.24	0.00163	CID (Collision Induced Dissociation)	MS2	68.5478	7384	DG009795_Gallo_32.raw	0/0		2.32	154227	68.5	0	0.03677
High	Sequest HT (A2)	Unambiguous	2	f3.28776	r1.19284; f3.28776	0.2551	2.44	0.00169	CID (Collision Induced Dissociation)	MS2	77.0189	8417	DG009795_Gallo_32.raw	0/0		2.47	1.8222e+07	76.58	0	0.09679
High	Sequest HT (A2)	Unambiguous	2	f3.28776	r1.19284; f3.28776	0.4257	2.97	0.00243	CID (Collision Induced Dissociation)	MS2	76.8201	8388	DG009795_Gallo_32.raw	0/0		3.5	5.93477e+06	76.86	0	0.0006267
High	Sequest HT (A2)	Unambiguous	2	f3.28776	r1.19284; f3.28776	0.482	2.44	0.00169	CID (Collision Induced Dissociation)	MS2	76.4402	8330	DG009795_Gallo_32.raw	0/0		3.61	1.8222e+07	76.58	0	0.003075
High	Sequest HT (A2)	Unambiguous	2	f3.28776	r1.19284; f3.28776	0.4239	2.82	0.00231	CID (Collision Induced Dissociation)	MS2	76.7033	8614	DG009790_Gallo_30.raw	0/0		4.27	5.4599e+06	76.76	0	0.00952
High	Sequest HT (A2)	Unambiguous	2	f3.28776	r1.19284; f3.28776	0.1972	3.36	0.00312	CID (Collision Induced Dissociation)	MS2	73.3205	8065	DG009790_Gallo_30.raw	0/0		2.89	6.21944e+07	73.5	0	0.01431
High	Sequest HT (A2)	Unambiguous	2	f3.28776	r1.19284; f3.28776	0.2584	0.64	0.00037	CID (Collision Induced Dissociation)	MS2	57.2593	6085	DG009790_Gallo_30.raw	0/0		2.67	2.09317e+07	57.6	0	0.06112
High	Sequest HT (A2)	Unambiguous	2	f3.28776	r1.19284; f3.28776	0.2182	1.78	0.00105	CID (Collision Induced Dissociation)	MS2	57.7959	6143	DG009790_Gallo_30.raw	0/0		2.75	2.09317e+07	57.6	0	0.0933
High	Sequest HT (A2)	Unambiguous	2	f3.28776	r1.19284; f3.28776	0.2659	1.78	0.00105	CID (Collision Induced Dissociation)	MS2	58.344	6199	DG009790_Gallo_30.raw	0/0		2.67			0	0.09173
High	Sequest HT (A2)	Unambiguous	2	f3.28776	r1.19284; f3.28776	0.2405	1.88	0.00111	CID (Collision Induced Dissociation)	MS2	60.0389	6386	DG009790_Gallo_30.raw	0/0		2.62	111009	60.2	0	0.05387
High	Sequest HT (A2)	Unambiguous	2	f3.28776	r1.19284; f3.28776	0.2137	1.36	0.0008	CID (Collision Induced Dissociation)	MS2	59.4601	6328	DG009790_Gallo_30.raw	0/0		2.48	274674	59.41	0	0.06874
High	Sequest HT (A2)	Unambiguous	2	f3.28776	r1.19284; f3.28776	0.1859	2.18	0.00149	CID (Collision Induced Dissociation)	MS2	14.8126	1637	DG009790_Gallo_30.raw	0/0		1.56			0	0.05652
High	Sequest HT (A2)	Unambiguous	2	f3.28776	r1.19284; f3.28776	0.3158	2.63	0.00179	CID (Collision Induced Dissociation)	MS2	14.3027	1582	DG009790_Gallo_30.raw	0/0		1.9	4.87597e+07	14.46	0	0.01632
High	Sequest HT (A2)	Unambiguous	2	f3.28776	r1.19284; f3.28776	0.2074	2.69	0.00166	CID (Collision Induced Dissociation)	MS2	13.737	1525	DG009790_Gallo_30.raw	0/0		2.17	4.72287e+06	13.93	0	0.05917
High	Sequest HT (A2)	Unambiguous	2	f3.28776	r1.19284; f3.28776	0.4091	1.55	0.00127	CID (Collision Induced Dissociation)	MS2	76.9053	8816	DG009785_Gallo_26.raw	0/0		3.52	401328	76.9	0	0.002909
High	Sequest HT (A2)	Unambiguous	2	f3.28776	r1.19284; f3.28776	0.3688	2.44	0.00169	CID (Collision Induced Dissociation)	MS2	76.5719	8756	DG009785_Gallo_26.raw	0/0		2.82	1.48873e+06	76.63	0	0.001945
High	Sequest HT (A2)	Unambiguous	2	f3.28776	r1.19284; f3.28776	0.313	2.45	0.00167	CID (Collision Induced Dissociation)	MS2	16.9801	1855	DG009790_Gallo_30.raw	0/0		2.3	159567	16.95	0	0.00985
High	Sequest HT (A2)	Unambiguous	2	f3.28776	r1.19284; f3.28776	0.2479	2.16	0.00155	CID (Collision Induced Dissociation)	MS2	17.8305	1940	DG009790_Gallo_30.raw	0/0		2.38	675277	17.85	0	0.06668
High	Sequest HT (A2)	Unambiguous	2	f3.28776	r1.19284; f3.28776	0.3088	2.13	0.00125	HCD (High Energy Collision Dissociation)	MS2	20.8391	2255	DG009790_Gallo_30.raw	0/0		3.53	151337	20.83	0	0.08105
High	Sequest HT (A2)	Unambiguous	2	f3.28776	r1.19284; f3.28776	0.5397	3.41	0.00373	CID (Collision Induced Dissociation)	MS2	45.0293	4767	DG009790_Gallo_30.raw	0/0		3.78	770180	45.09	0	0.0008345
High	Sequest HT (A2)	Unambiguous	2	f3.28776	r1.19284; f3.28776	0.4986	2.85	0.00272	CID (Collision Induced Dissociation)	MS2	41.1833	4366	DG009790_Gallo_30.raw	0/0		3.45	506420	41.16	0	0.002849
High	Sequest HT (A2)	Unambiguous	2	f3.28776	r1.19284; f3.28776	0.523	2.26	0.00198	CID (Collision Induced Dissociation)	MS2	33.0465	3528	DG009790_Gallo_30.raw	0/0		3.92	699654	33.05	0	0.0007187
High	Sequest HT (A2)	Unambiguous	2	f3.28776	r1.19284; f3.28776	0.3686	1.38	0.00112	CID (Collision Induced Dissociation)	MS2	32.3458	3454	DG009790_Gallo_30.raw	0/0		2.74	590823	32.19	0	0.05063
High	Sequest HT (A2)	Selected	2	f3.28776	r1.19284; f3.28776	0.0498	1.93	0.0013	CID (Collision Induced Dissociation)	MS2	22.4228	2412	DG009790_Gallo_30.raw	0/0		2.61	1.44209e+06	22.5	0	0.03195
High	Sequest HT (A2)	Unambiguous	2	f3.28776	r1.19284; f3.28776	0.1128	1.57	0.00092	CID (Collision Induced Dissociation)	MS2	60.5669	6447	DG009790_Gallo_30.raw	0/0		2.57	185048	60.6	0	0.1056
High	Sequest HT (A2)	Unambiguous	2	f3.28776	r1.19284; f3.28776	0.166	2.3	0.00135	CID (Collision Induced Dissociation)	MS2	58.885	6259	DG009790_Gallo_30.raw	0/0		2.35	103943	59	0	0.05162
High	Sequest HT (A2)	Unambiguous	2	f3.28776	r1.19284; f3.28776	0.2461	2.31	0.00157	CID (Collision Induced Dissociation)	MS2	65.1139	6963	DG009790_Gallo_30.raw	0/0		3.21	384617	65.11	0	0.05218
High	Sequest HT (A2)	Unambiguous	2	f3.28776	r1.19284; f3.28776	0.25	3.34	0.00242	CID (Collision Induced Dissociation)	MS2	68.3738	7394	DG009790_Gallo_30.raw	0/0		2.52	1.0581e+06	68.43	0	0.01394
High	Sequest HT (A2)	Unambiguous	2	f3.28776	r1.19284; f3.28776	0.3242	3.57	0.00325	CID (Collision Induced Dissociation)	MS2	68.8184	7456	DG009790_Gallo_30.raw	0/0		2.93	2.82657e+06	68.94	0	0.01508
High	Sequest HT (A2)	Unambiguous	2	f3.28776	r1.19284; f3.28776	0.2862	1.91	0.00122	CID (Collision Induced Dissociation)	MS2	72.847	8008	DG009790_Gallo_30.raw	0/0		2.76	1.11473e+06	72.85	0	0.02813
High	Sequest HT (A2)	Unambiguous	2	f3.28776	r1.19284; f3.28776	0.3408	0.74	0.00057	CID (Collision Induced Dissociation)	MS2	73.1931	8051	DG009790_Gallo_30.raw	0/0		3.14	387249	73.23	0	0.007967
High	Sequest HT (A2)	Unambiguous	2	f3.28776	r1.19284; f3.28776	0.4444	2.07	0.0017	CID (Collision Induced Dissociation)	MS2	77.022	8166	DG009800_Gallo_36.raw	0/0		2.88	111683	77.02	0	0.04863
High	Sequest HT (A2)	Unambiguous	2	f3.28776	r1.19284; f3.28776	0.1471	1.47	0.00086	CID (Collision Induced Dissociation)	MS2	61.1109	6502	DG009790_Gallo_30.raw	0/0		2.38	167350	61.17	0	0.06403
High	Sequest HT (A2)	Unambiguous	2	f3.28776	r1.19284; f3.28776	0.0636	2.18	0.00149	CID (Collision Induced Dissociation)	MS2	19.6895	2137	DG009790_Gallo_30.raw	0/0		1.73	81613.8	19.69	0.003364	0.1202
High	Sequest HT (A2)	Unambiguous	2	f3.28776	r1.19284; f3.28776	0.157	2	0.00136	CID (Collision Induced Dissociation)	MS2	21.3956	2310	DG009790_Gallo_30.raw	0/0		1.72	385030	21.33	0.003364	0.1543
High	Sequest HT (A2)	Unambiguous	2	f3.28776	r1.19284; f3.28776	0.1422	0.75	0.00059	CID (Collision Induced Dissociation)	MS2	38.999	4148	DG009790_Gallo_30.raw	0/0		2.25	542281	39.05	0.003364	0.1292
High	Sequest HT (A2)	Unambiguous	2	f3.28776	r1.19284; f3.28776	0.1169	1.65	0.00153	CID (Collision Induced Dissociation)	MS2	76.0315	8490	DG009790_Gallo_30.raw	0/0		2.31	1.70364e+06	76.05	0.003364	0.1556
High	Sequest HT (A2)	Unambiguous	2	f3.28776	r1.19284; f3.28776	0.1922	2.68	0.00212	CID (Collision Induced Dissociation)	MS2	61.9032	6594	DG009790_Gallo_30.raw	0/0		2.55			0.003364	0.1335
High	Sequest HT (A2)	Unambiguous	2	f3.28776	r1.19284; f3.28776	0.2826	2.27	0.00155	CID (Collision Induced Dissociation)	MS2	15.4024	1696	DG009790_Gallo_30.raw	0/0		1.84			0.003364	0.1457
High	Sequest HT (A2)	Unambiguous	2	f3.28776	r1.19284; f3.28776	0.1765	1.68	0.00077	CID (Collision Induced Dissociation)	MS2	5.2435	544	DG009790_Gallo_30.raw	0/0		1.87	2.26935e+06	5.02	0.003364	0.1292
High	Sequest HT (A2)	Unambiguous	2	f3.28776	r1.19284; f3.28776	0.2418	1.99	0.00117	CID (Collision Induced Dissociation)	MS2	57.8375	6183	DG009795_Gallo_32.raw	0/0		2.73	8.45585e+06	57.61	0.003364	0.1486
High	Sequest HT (A2)	Unambiguous	2	f3.28776	r1.19284; f3.28776	0.1506	1.78	0.00105	CID (Collision Induced Dissociation)	MS2	57.8936	6303	DG009800_Gallo_36.raw	0/0		2.59	4.19199e+06	57.8	0.003364	0.1382
High	Sequest HT (A2)	Unambiguous	2	f3.28776	r1.19284; f3.28776	0.1745	1.47	0.00086	CID (Collision Induced Dissociation)	MS2	58.4033	6355	DG009800_Gallo_36.raw	0/0		2.35			0.003364	0.1128
High	Sequest HT (A2)	Unambiguous	2	f3.28776	r1.19284; f3.28776	0.0647	1.67	0.00098	CID (Collision Induced Dissociation)	MS2	62.7843	6694	DG009790_Gallo_30.raw	0/0		2.32			0.003364	0.1141
High	Sequest HT (A2)	Unambiguous	2	f3.28776	r1.19284; f3.28776	0.1187	1.96	0.00178	CID (Collision Induced Dissociation)	MS2	68.9024	7424	DG009795_Gallo_32.raw	0/0		2.19			0.003364	0.1359
High	Sequest HT (A2)	Unambiguous	2	f3.28776	r1.19284; f3.28776	0.0657	2.5	0.00147	CID (Collision Induced Dissociation)	MS2	58.9232	6303	DG009795_Gallo_32.raw	0/0		2.13			0.005932	0.1732
High	Sequest HT (A2)	Selected	2	f3.28776	r1.19284; f3.28776	0.0374	1.99	0.00117	CID (Collision Induced Dissociation)	MS2	60.6373	6575	DG009800_Gallo_36.raw	0/0		1.87	90164.8	60.66	0.005932	0.1592
High	Sequest HT (A2)	Unambiguous	2	f3.28776	r1.19284; f3.28776	0.1131	2.99	0.00236	CID (Collision Induced Dissociation)	MS2	61.9827	6625	DG009795_Gallo_32.raw	0/0		2.74			0.005932	0.1727
High	Sequest HT (A2)	Unambiguous	2	f3.28776	r1.19284; f3.28776	0.1166	3.34	0.00196	CID (Collision Induced Dissociation)	MS2	59.4489	6364	DG009795_Gallo_32.raw	0/0		2.23	48889.4	59.44	0.005932	0.206
PSMB3	f2.19411	EMADLINAIKTTVEAGLNGEWTDMGFGIADIVAKGIDVISGFFG	97.7273	13	50	4.6		2.52057e+06	1.10328e+07
Confidence	Identifying Node	PSM Ambiguity	# Proteins	Master Protein Accessions	Protein Accessions	DeltaScore	DeltaM [ppm]	Deltam/z [Da]	Activation Type	MS Order	RT [min]	First Scan	Spectrum File	Ions Matched	Annotation	XCorr	Area	Apex RT [min]	Percolator q-Value	Percolator PEP
High	Sequest HT (A2)	Unambiguous	2	f2.19411; f3.19496	f2.19411; f3.19496	0.2565	2.18	0.00108	CID (Collision Induced Dissociation)	MS2	59.2339	6338	DG009795_Gallo_32.raw	0/0		2.69	1.05393e+06	59.22	0	0.06598
High	Sequest HT (A2)	Unambiguous	2	f2.19411; f3.19496	f2.19411; f3.19496	0.3426	2.13	0.00127	CID (Collision Induced Dissociation)	MS2	59.2872	6345	DG009795_Gallo_32.raw	0/0		3.59	3.61195e+06	59.45	0	0.009431
High	Sequest HT (A2)	Unambiguous	2	f2.19411; f3.19496	f2.19411; f3.19496	0.2222	2.64	0.00158	CID (Collision Induced Dissociation)	MS2	59.838	6411	DG009795_Gallo_32.raw	0/0		3.06	3.61195e+06	59.45	0	0.07719
High	Sequest HT (A2)	Rejected	1	f2.19411	f2.19411		0.77	0.0004	HCD (High Energy Collision Dissociation)	MS2	66.8349	7184	DG009795_Gallo_32.raw	0/0		3.61	639239	66.8	0	0.01637
High	Sequest HT (A2)	Selected	1	f2.19411	f2.19411	0.0029	0.35	0.00027	CID (Collision Induced Dissociation)	MS2	66.6778	7166	DG009795_Gallo_32.raw	0/0		3.46	4.17229e+06	66.8	0	0.005424
High	Sequest HT (A2)	Unambiguous	2	f2.19411; f3.19496	f2.19411; f3.19496	0.3274	2.64	0.00186	CID (Collision Induced Dissociation)	MS2	64.2892	6883	DG009795_Gallo_32.raw	0/0		2.81	113431	64.37	0	0.01558
High	Sequest HT (A2)	Unambiguous	2	f2.19411; f3.19496	f2.19411; f3.19496	0.4655	3.25	0.00229	CID (Collision Induced Dissociation)	MS2	62.6388	6692	DG009795_Gallo_32.raw	0/0		3.33			0	0.02057
High	Sequest HT (A2)	Unambiguous	2	f2.19411; f3.19496	f2.19411; f3.19496	0.4674	3.33	0.00235	CID (Collision Induced Dissociation)	MS2	62.1127	6638	DG009795_Gallo_32.raw	0/0		3.83			0	0.05665
High	Sequest HT (A2)	Unambiguous	2	f2.19411; f3.19496	f2.19411; f3.19496	0.5171	2.21	0.00156	CID (Collision Induced Dissociation)	MS2	61.537	6581	DG009795_Gallo_32.raw	0/0		3.81	2.65495e+07	61.16	0	0.005581
High	Sequest HT (A2)	Unambiguous	2	f2.19411; f3.19496	f2.19411; f3.19496	0.4623	2.56	0.0018	CID (Collision Induced Dissociation)	MS2	60.9932	6525	DG009795_Gallo_32.raw	0/0		3.98	2.65495e+07	61.16	0	0.001048
High	Sequest HT (A2)	Unambiguous	2	f2.19411; f3.19496	f2.19411; f3.19496	0.1509	1.52	0.00091	CID (Collision Induced Dissociation)	MS2	60.7072	6496	DG009795_Gallo_32.raw	0/0		2.65			0	0.09286
High	Sequest HT (A2)	Unambiguous	2	f2.19411; f3.19496	f2.19411; f3.19496	0.3569	1.86	0.00131	CID (Collision Induced Dissociation)	MS2	64.9111	6950	DG009795_Gallo_32.raw	0/0		2.55	109560	64.74	0	0.04564
High	Sequest HT (A2)	Unambiguous	2	f2.19411; f3.19496	f2.19411; f3.19496	0.4213	1.31	0.00123	CID (Collision Induced Dissociation)	MS2	76.2503	8530	DG009790_Gallo_30.raw	0/0		4.13	825020	76.43	0	0.005611
High	Sequest HT (A2)	Unambiguous	2	f2.19411; f3.19496	f2.19411; f3.19496	0.5186	2.16	0.00202	CID (Collision Induced Dissociation)	MS2	75.6854	8424	DG009790_Gallo_30.raw	0/0		6.17	817964	75.8	0	0.0002388
High	Sequest HT (A2)	Unambiguous	2	f2.19411; f3.19496	f2.19411; f3.19496	0.2764	2.87	0.00269	CID (Collision Induced Dissociation)	MS2	77.5927	8775	DG009790_Gallo_30.raw	0/0		4.16	354465	77.74	0	0.002182
High	Sequest HT (A2)	Unambiguous	2	f2.19411; f3.19496	f2.19411; f3.19496	0.5413	2.55	0.00239	CID (Collision Induced Dissociation)	MS2	74.6035	8250	DG009790_Gallo_30.raw	0/0		6.3	478867	74.67	0	0.002109
High	Sequest HT (A2)	Unambiguous	2	f2.19411; f3.19496	f2.19411; f3.19496	0.5901	3.23	0.0031	CID (Collision Induced Dissociation)	MS2	74.3648	8215	DG009790_Gallo_30.raw	0/0		5.44	1.00534e+06	74.36	0	0.002632
High	Sequest HT (A2)	Unambiguous	2	f2.19411; f3.19496	f2.19411; f3.19496	0.5323	2.61	0.00245	CID (Collision Induced Dissociation)	MS2	75.1476	8333	DG009790_Gallo_30.raw	0/0		6.03	521081	75.23	0	0.0005941
High	Sequest HT (A2)	Unambiguous	3	f2.19411; f3.19496; f2.19392	f2.19411; f3.19496; f2.19392	0.2057	3.09	0.0019	CID (Collision Induced Dissociation)	MS2	26.6574	2876	DG009795_Gallo_32.raw	0/0		2.82	180442	26.66	0	0.07165
High	Sequest HT (A2)	Unambiguous	2	f2.19411; f3.19496	f2.19411; f3.19496	0.4724	1.97	0.00244	CID (Collision Induced Dissociation)	MS2	78.6556	8953	DG009790_Gallo_30.raw	0/0		4.53			0	0.00794
High	Sequest HT (A2)	Selected	1	f2.19411	f2.19411	0.002	0.88	0.00082	CID (Collision Induced Dissociation)	MS2	79.2249	8805	DG009795_Gallo_32.raw	0/0		4.96	28415472	79.18	0	0.01307
High	Sequest HT (A2)	Unambiguous	2	f2.19411; f3.19496	f2.19411; f3.19496	0.3177	3	0.00281	CID (Collision Induced Dissociation)	MS2	78.7568	8598	DG009795_Gallo_32.raw	0/0		3.84	1.27194e+06	78.7	0	0.1061
High	Sequest HT (A2)	Unambiguous	2	f2.19411; f3.19496	f2.19411; f3.19496	0.5016	2.3	0.00162	CID (Collision Induced Dissociation)	MS2	78.5516	8574	DG009795_Gallo_32.raw	0/0		3.11	207948	78.55	0	0.008524
High	Sequest HT (A2)	Unambiguous	2	f2.19411; f3.19496	f2.19411; f3.19496	0.5212	2.56	0.0018	CID (Collision Induced Dissociation)	MS2	61.0867	6616	DG009800_Gallo_36.raw	0/0		3.78	2.10736e+06	61.15	0	0.006439
High	Sequest HT (A2)	Unambiguous	2	f2.19411; f3.19496	f2.19411; f3.19496	0.2956	0.8	0.00048	CID (Collision Induced Dissociation)	MS2	59.4001	6450	DG009800_Gallo_36.raw	0/0		3.18	384775	59.46	0	0.04132
High	Sequest HT (A2)	Unambiguous	2	f2.19411; f3.19496	f2.19411; f3.19496	0.1505	0.94	0.00047	CID (Collision Induced Dissociation)	MS2	59.2547	6436	DG009800_Gallo_36.raw	0/0		2.06	297203	59.25	0	0.09264
High	Sequest HT (A2)	Unambiguous	2	f2.19411; f3.19496	f2.19411; f3.19496	0.5548	3.2	0.003	CID (Collision Induced Dissociation)	MS2	73.782	8013	DG009795_Gallo_32.raw	0/0		6.2	7.37963e+06	73.87	0	0.005097
High	Sequest HT (A2)	Unambiguous	2	f2.19411; f3.19496	f2.19411; f3.19496	0.4413	2.79	0.00195	CID (Collision Induced Dissociation)	MS2	69.1709	7449	DG009795_Gallo_32.raw	0/0		3.58	327984	69.13	0	0.00915
High	Sequest HT (A2)	Unambiguous	2	f2.19411; f3.19496	f2.19411; f3.19496	0.466	1.45	0.00164	CID (Collision Induced Dissociation)	MS2	77.4779	8472	DG009795_Gallo_32.raw	0/0		3.24	583991	77.5	0	0.003845
High	Sequest HT (A2)	Unambiguous	2	f2.19411; f3.19496	f2.19411; f3.19496	0.3513	3.53	0.0033	CID (Collision Induced Dissociation)	MS2	74.336	8078	DG009795_Gallo_32.raw	0/0		5.01	108244	74.38	0	0.01009
High	Sequest HT (A2)	Unambiguous	2	f2.19411; f3.19496	f2.19411; f3.19496	0.4786	3.66	0.00342	CID (Collision Induced Dissociation)	MS2	76.059	8287	DG009795_Gallo_32.raw	0/0		4.43	651194	76.14	0	0.01299
High	Sequest HT (A2)	Unambiguous	2	f2.19411; f3.19496	f2.19411; f3.19496	0.3959	0.01	1e-05	CID (Collision Induced Dissociation)	MS2	75.3973	8211	DG009795_Gallo_32.raw	0/0		4.42	123910	75.33	0	0.0162
High	Sequest HT (A2)	Unambiguous	2	f2.19411; f3.19496	f2.19411; f3.19496	0.1981	0.2	0.00019	CID (Collision Induced Dissociation)	MS2	74.8538	8146	DG009795_Gallo_32.raw	0/0		3.08	221780	74.82	0	0.02545
High	Sequest HT (A2)	Unambiguous	2	f2.19411; f3.19496	f2.19411; f3.19496	0.5409	1.05	0.00098	CID (Collision Induced Dissociation)	MS2	73.5481	8095	DG009790_Gallo_30.raw	0/0		5.99	2.57705e+07	73.64	0	0.0001265
High	Sequest HT (A2)	Unambiguous	2	f2.19411; f3.19496	f2.19411; f3.19496	0.2259	0.68	0.00036	CID (Collision Induced Dissociation)	MS2	58.464	6213	DG009790_Gallo_30.raw	0/0		3.01	982535	58.49	0	0.1064
High	Sequest HT (A2)	Unambiguous	2	f2.19411; f3.19496	f2.19411; f3.19496	0.5206	-24.17	-0.02264	CID (Collision Induced Dissociation)	MS2	73.5074	8089	DG009790_Gallo_30.raw	0/0		6.07			0	0.01412
High	Sequest HT (A2)	Unambiguous	2	f2.19411; f3.19496	f2.19411; f3.19496	0.3154	1.72	0.00103	CID (Collision Induced Dissociation)	MS2	59.4162	6322	DG009790_Gallo_30.raw	0/0		2.98	664200	59.42	0	0.06491
High	Sequest HT (A2)	Unambiguous	3	f2.19411; f3.19496; f2.19392	f2.19411; f3.19496; f2.19392	0.327	1.8	0.00111	CID (Collision Induced Dissociation)	MS2	26.7048	2848	DG009790_Gallo_30.raw	0/0		3.15	569085	26.74	0	0.02796
High	Sequest HT (A2)	Selected	1	f2.19411	f2.19411	0.0027	1.29	0.00101	CID (Collision Induced Dissociation)	MS2	66.6862	7178	DG009790_Gallo_30.raw	0/0		3.71	2.52057e+06	66.77	0	0.002747
High	Sequest HT (A2)	Unambiguous	2	f2.19411; f3.19496	f2.19411; f3.19496	0.4718	2.96	0.00207	CID (Collision Induced Dissociation)	MS2	69.1363	7495	DG009790_Gallo_30.raw	0/0		3.37			0	0.0383
High	Sequest HT (A2)	Unambiguous	1	f2.19411	f2.19411	0.342	3.38	0.00262	CID (Collision Induced Dissociation)	MS2	73.1238	8040	DG009790_Gallo_30.raw	0/0		3.48	1.49246e+06	73.14	0	0.009815
High	Sequest HT (A2)	Unambiguous	2	f2.19411; f3.19496	f2.19411; f3.19496	0.4318	2.56	0.0018	CID (Collision Induced Dissociation)	MS2	61.0547	6497	DG009790_Gallo_30.raw	0/0		3.96	7.36177e+06	61.17	0	0.007717
High	Sequest HT (A2)	Unambiguous	2	f2.19411; f3.19496	f2.19411; f3.19496	0.3817	2.64	0.00186	CID (Collision Induced Dissociation)	MS2	61.6066	6565	DG009790_Gallo_30.raw	0/0		2.62	7.36177e+06	61.17	0	0.02849
High	Sequest HT (A2)	Rejected	1	f2.19411	f2.19411		0.6	0.00055	CID (Collision Induced Dissociation)	MS2	79.3263	8898	DG009795_Gallo_32.raw	0/0		3.35	1.31658e+07	79.29	0.003364	0.1153
High	Sequest HT (A2)	Unambiguous	1	f2.19411	f2.19411	0.4729	2.91	0.00207	CID (Collision Induced Dissociation)	MS2	78.2567	8546	DG009795_Gallo_32.raw	0/0		2.58	510565	78.28	0.003364	0.117
High	Sequest HT (A2)	Unambiguous	2	f2.19411; f3.19496	f2.19411; f3.19496	0.3232	3.25	0.00229	CID (Collision Induced Dissociation)	MS2	63.1649	6752	DG009795_Gallo_32.raw	0/0		2.63	176952	63.02	0.003364	0.143
High	Sequest HT (A2)	Unambiguous	3	f2.19411; f3.19496; f2.19392	f2.19411; f3.19496; f2.19392	0.316	2.07	0.00115	CID (Collision Induced Dissociation)	MS2	27.4325	2954	DG009795_Gallo_32.raw	0/0		2.88	362738	27.41	0.003364	0.1097
High	Sequest HT (A2)	Unambiguous	2	f2.19411; f3.19496	f2.19411; f3.19496	0.2483	2.81	0.00199	CID (Collision Induced Dissociation)	MS2	67.675	7275	DG009795_Gallo_32.raw	0/0		2.86	117615	67.65	0.003364	0.1167
High	Sequest HT (A2)	Unambiguous	2	f2.19411; f3.19496	f2.19411; f3.19496	0.2508	2.31	0.00121	CID (Collision Induced Dissociation)	MS2	58.3968	6240	DG009795_Gallo_32.raw	0/0		3.07	3.00061e+06	58.49	0.005932	0.1594
High	Sequest HT (A2)	Unambiguous	2	f2.19411; f3.19496	f2.19411; f3.19496	0.2933	3.59	0.00253	CID (Collision Induced Dissociation)	MS2	66.3491	7119	DG009795_Gallo_32.raw	0/0		2.25	268862	65.99	0.005932	0.1995
PSMB1	f2.19392	MSGLIDAIKTTVEAGLNGEWADMGLGIAEIVAKGIEAISGFFG	100	14	25	4.4	924924	3.73478e+07	2.29916e+07	1.7318e+06
Confidence	Identifying Node	PSM Ambiguity	# Proteins	Master Protein Accessions	Protein Accessions	DeltaScore	DeltaM [ppm]	Deltam/z [Da]	Activation Type	MS Order	RT [min]	First Scan	Spectrum File	Ions Matched	Annotation	XCorr	Area	Apex RT [min]	Percolator q-Value	Percolator PEP
High	Sequest HT (A2)	Unambiguous	1	f2.19392	f2.19392	0.2302	1.91	0.00112	CID (Collision Induced Dissociation)	MS2	56.5396	6035	DG009795_Gallo_32.raw	0/0		2.52	957708	56.57	0	0.01446
High	Sequest HT (A2)	Unambiguous	1	f2.19392	f2.19392	0.278	2.84	0.00193	CID (Collision Induced Dissociation)	MS2	59.0212	6315	DG009795_Gallo_32.raw	0/0		3.13	6.974e+06	59.15	0	0.006976
High	Sequest HT (A2)	Unambiguous	1	f2.19392	f2.19392	0.2602	2.48	0.00169	CID (Collision Induced Dissociation)	MS2	59.542	6373	DG009795_Gallo_32.raw	0/0		2.69	6.974e+06	59.15	0	0.03219
High	Sequest HT (A2)	Unambiguous	1	f2.19392	f2.19392	0.2969	1.46	0.00109	CID (Collision Induced Dissociation)	MS2	74.8392	8288	DG009790_Gallo_30.raw	0/0		2.93	873852	74.89	0	0.07042
High	Sequest HT (A2)	Unambiguous	1	f2.19392	f2.19392	0.42	2.7	0.00226	CID (Collision Induced Dissociation)	MS2	77.7259	8796	DG009790_Gallo_30.raw	0/0		3	2.33115e+06	77.73	0	0.005281
High	Sequest HT (A2)	Unambiguous	1	f2.19392	f2.19392	0.4908	3.57	0.00273	CID (Collision Induced Dissociation)	MS2	44.9594	4789	DG009795_Gallo_32.raw	0/0		3.81	647221	44.98	0	0.001427
High	Sequest HT (A2)	Unambiguous	3	f2.19411; f3.19496; f2.19392	f2.19411; f3.19496; f2.19392	0.2057	3.09	0.0019	CID (Collision Induced Dissociation)	MS2	26.6574	2876	DG009795_Gallo_32.raw	0/0		2.82	180442	26.66	0	0.07165
High	Sequest HT (A2)	Unambiguous	1	f2.19392	f2.19392	0.3132	-1.27	-0.0016	CID (Collision Induced Dissociation)	MS2	79.35	9124	DG009790_Gallo_30.raw	0/0		5.3	208763748	79.37	0	0.008027
High	Sequest HT (A2)	Unambiguous	1	f2.19392	f2.19392	0.4863	0.32	0.00048	CID (Collision Induced Dissociation)	MS2	79.2762	8845	DG009795_Gallo_32.raw	0/0		5.1	2.10623e+07	79.23	0	0.07408
High	Sequest HT (A2)	Unambiguous	1	f2.19392	f2.19392	0.4739	0.65	0.00064	CID (Collision Induced Dissociation)	MS2	79.2697	8838	DG009795_Gallo_32.raw	0/0		6.14	74934602	79.23	0	0.0003173
High	Sequest HT (A2)	Unambiguous	1	f2.19392	f2.19392	0.1169	1.16	0.00116	CID (Collision Induced Dissociation)	MS2	79.2216	8801	DG009795_Gallo_32.raw	0/0		2.31	204974896	79.17	0	0.01699
High	Sequest HT (A2)	Unambiguous	1	f2.19392	f2.19392	0.3824	1.9	0.00159	CID (Collision Induced Dissociation)	MS2	77.7875	8503	DG009795_Gallo_32.raw	0/0		3.06	3.58171e+06	77.97	0	0.009087
High	Sequest HT (A2)	Unambiguous	1	f2.19392	f2.19392	0.2542	2.61	0.00184	CID (Collision Induced Dissociation)	MS2	73.3576	7817	DG009800_Gallo_36.raw	0/0		2.36	1.7318e+06	73.46	0	0.009611
High	Sequest HT (A2)	Unambiguous	1	f2.19392	f2.19392	0.3299	3.08	0.00206	CID (Collision Induced Dissociation)	MS2	73.7993	8132	DG009790_Gallo_30.raw	0/0		2.91	3.76634e+06	73.85	0	0.003146
High	Sequest HT (A2)	Unambiguous	1	f2.19392	f2.19392	0.2819	2.09	0.00147	CID (Collision Induced Dissociation)	MS2	73.2093	7938	DG009795_Gallo_32.raw	0/0		2.59	7.17176e+06	73.32	0	0.03051
High	Sequest HT (A2)	Unambiguous	1	f2.19392	f2.19392	0.2915	2.82	0.00181	CID (Collision Induced Dissociation)	MS2	70.6131	7629	DG009795_Gallo_32.raw	0/0		2.23	174285	70.61	0	0.03689
High	Sequest HT (A2)	Unambiguous	1	f2.19392	f2.19392	0.4687	2.35	0.00206	CID (Collision Induced Dissociation)	MS2	76.7806	8377	DG009795_Gallo_32.raw	0/0		4.31	4.29815e+06	76.86	0	0.00053
High	Sequest HT (A2)	Unambiguous	1	f2.19392	f2.19392	0.3218	2.77	0.00206	CID (Collision Induced Dissociation)	MS2	74.9361	8155	DG009795_Gallo_32.raw	0/0		3.48	525574	74.91	0	0.00658
High	Sequest HT (A2)	Unambiguous	1	f2.19392	f2.19392	0.2387	2.66	0.00181	CID (Collision Induced Dissociation)	MS2	59.1542	6288	DG009790_Gallo_30.raw	0/0		2.43	446907	59.19	0	0.01254
High	Sequest HT (A2)	Unambiguous	1	f2.19392	f2.19392	0.4517	2.27	0.0016	CID (Collision Induced Dissociation)	MS2	73.4364	8355	DG009785_Gallo_26.raw	0/0		3.52	1.62003e+06	73.49	0	0.0135
High	Sequest HT (A2)	Unambiguous	3	f2.19411; f3.19496; f2.19392	f2.19411; f3.19496; f2.19392	0.327	1.8	0.00111	CID (Collision Induced Dissociation)	MS2	26.7048	2848	DG009790_Gallo_30.raw	0/0		3.15	569085	26.74	0	0.02796
High	Sequest HT (A2)	Unambiguous	1	f2.19392	f2.19392	0.3069	2.53	0.00178	CID (Collision Induced Dissociation)	MS2	73.1539	8044	DG009790_Gallo_30.raw	0/0		2.9	7.90493e+06	73.22	0	0.006404
High	Sequest HT (A2)	Unambiguous	3	f2.19411; f3.19496; f2.19392	f2.19411; f3.19496; f2.19392	0.316	2.07	0.00115	CID (Collision Induced Dissociation)	MS2	27.4325	2954	DG009795_Gallo_32.raw	0/0		2.88	362738	27.41	0.003364	0.1097
High	Sequest HT (A2)	Unambiguous	1	f2.19392	f2.19392	0.2431	1.47	0.00076	CID (Collision Induced Dissociation)	MS2	55.0324	5877	DG009795_Gallo_32.raw	0/0		2.55	610476	55.06	0.003364	0.135
High	Sequest HT (A2)	Unambiguous	1	f2.19392	f2.19392	0.2261	3.38	0.0023	CID (Collision Induced Dissociation)	MS2	59.2248	6712	DG009785_Gallo_26.raw	0/0		2.61	229820	59.25	0.005932	0.1962
PSMB2	f3.19496	RMSDLINAIKTTVEAGLNGEWTDMGFGIADIVAKGIDVILGFFG	97.7273	13	50	4.7		2.52057e+06	1.73717e+07
Confidence	Identifying Node	PSM Ambiguity	# Proteins	Master Protein Accessions	Protein Accessions	DeltaScore	DeltaM [ppm]	Deltam/z [Da]	Activation Type	MS Order	RT [min]	First Scan	Spectrum File	Ions Matched	Annotation	XCorr	Area	Apex RT [min]	Percolator q-Value	Percolator PEP
High	Sequest HT (A2)	Unambiguous	2	f2.19411; f3.19496	f2.19411; f3.19496	0.2565	2.18	0.00108	CID (Collision Induced Dissociation)	MS2	59.2339	6338	DG009795_Gallo_32.raw	0/0		2.69	1.05393e+06	59.22	0	0.06598
High	Sequest HT (A2)	Unambiguous	2	f2.19411; f3.19496	f2.19411; f3.19496	0.3426	2.13	0.00127	CID (Collision Induced Dissociation)	MS2	59.2872	6345	DG009795_Gallo_32.raw	0/0		3.59	3.61195e+06	59.45	0	0.009431
High	Sequest HT (A2)	Unambiguous	2	f2.19411; f3.19496	f2.19411; f3.19496	0.2222	2.64	0.00158	CID (Collision Induced Dissociation)	MS2	59.838	6411	DG009795_Gallo_32.raw	0/0		3.06	3.61195e+06	59.45	0	0.07719
High	Sequest HT (A2)	Selected	1	f3.19496	f3.19496	0.0163	0.77	0.0004	HCD (High Energy Collision Dissociation)	MS2	66.8349	7184	DG009795_Gallo_32.raw	0/0		3.67	639239	66.8	0	0.02728
High	Sequest HT (A2)	Rejected	1	f3.19496	f3.19496		0.35	0.00027	CID (Collision Induced Dissociation)	MS2	66.6778	7166	DG009795_Gallo_32.raw	0/0		3.45	4.17229e+06	66.8	0	0.00545
High	Sequest HT (A2)	Unambiguous	2	f2.19411; f3.19496	f2.19411; f3.19496	0.3274	2.64	0.00186	CID (Collision Induced Dissociation)	MS2	64.2892	6883	DG009795_Gallo_32.raw	0/0		2.81	113431	64.37	0	0.01558
High	Sequest HT (A2)	Unambiguous	2	f2.19411; f3.19496	f2.19411; f3.19496	0.4655	3.25	0.00229	CID (Collision Induced Dissociation)	MS2	62.6388	6692	DG009795_Gallo_32.raw	0/0		3.33			0	0.02057
High	Sequest HT (A2)	Unambiguous	2	f2.19411; f3.19496	f2.19411; f3.19496	0.4674	3.33	0.00235	CID (Collision Induced Dissociation)	MS2	62.1127	6638	DG009795_Gallo_32.raw	0/0		3.83			0	0.05665
High	Sequest HT (A2)	Unambiguous	2	f2.19411; f3.19496	f2.19411; f3.19496	0.5171	2.21	0.00156	CID (Collision Induced Dissociation)	MS2	61.537	6581	DG009795_Gallo_32.raw	0/0		3.81	2.65495e+07	61.16	0	0.005581
High	Sequest HT (A2)	Unambiguous	2	f2.19411; f3.19496	f2.19411; f3.19496	0.4623	2.56	0.0018	CID (Collision Induced Dissociation)	MS2	60.9932	6525	DG009795_Gallo_32.raw	0/0		3.98	2.65495e+07	61.16	0	0.001048
High	Sequest HT (A2)	Unambiguous	2	f2.19411; f3.19496	f2.19411; f3.19496	0.1509	1.52	0.00091	CID (Collision Induced Dissociation)	MS2	60.7072	6496	DG009795_Gallo_32.raw	0/0		2.65			0	0.09286
High	Sequest HT (A2)	Unambiguous	2	f2.19411; f3.19496	f2.19411; f3.19496	0.3569	1.86	0.00131	CID (Collision Induced Dissociation)	MS2	64.9111	6950	DG009795_Gallo_32.raw	0/0		2.55	109560	64.74	0	0.04564
High	Sequest HT (A2)	Unambiguous	2	f2.19411; f3.19496	f2.19411; f3.19496	0.4213	1.31	0.00123	CID (Collision Induced Dissociation)	MS2	76.2503	8530	DG009790_Gallo_30.raw	0/0		4.13	825020	76.43	0	0.005611
High	Sequest HT (A2)	Unambiguous	2	f2.19411; f3.19496	f2.19411; f3.19496	0.5186	2.16	0.00202	CID (Collision Induced Dissociation)	MS2	75.6854	8424	DG009790_Gallo_30.raw	0/0		6.17	817964	75.8	0	0.0002388
High	Sequest HT (A2)	Unambiguous	2	f2.19411; f3.19496	f2.19411; f3.19496	0.2764	2.87	0.00269	CID (Collision Induced Dissociation)	MS2	77.5927	8775	DG009790_Gallo_30.raw	0/0		4.16	354465	77.74	0	0.002182
High	Sequest HT (A2)	Unambiguous	2	f2.19411; f3.19496	f2.19411; f3.19496	0.5413	2.55	0.00239	CID (Collision Induced Dissociation)	MS2	74.6035	8250	DG009790_Gallo_30.raw	0/0		6.3	478867	74.67	0	0.002109
High	Sequest HT (A2)	Unambiguous	2	f2.19411; f3.19496	f2.19411; f3.19496	0.5901	3.23	0.0031	CID (Collision Induced Dissociation)	MS2	74.3648	8215	DG009790_Gallo_30.raw	0/0		5.44	1.00534e+06	74.36	0	0.002632
High	Sequest HT (A2)	Unambiguous	2	f2.19411; f3.19496	f2.19411; f3.19496	0.5323	2.61	0.00245	CID (Collision Induced Dissociation)	MS2	75.1476	8333	DG009790_Gallo_30.raw	0/0		6.03	521081	75.23	0	0.0005941
High	Sequest HT (A2)	Unambiguous	3	f2.19411; f3.19496; f2.19392	f2.19411; f3.19496; f2.19392	0.2057	3.09	0.0019	CID (Collision Induced Dissociation)	MS2	26.6574	2876	DG009795_Gallo_32.raw	0/0		2.82	180442	26.66	0	0.07165
High	Sequest HT (A2)	Unambiguous	2	f2.19411; f3.19496	f2.19411; f3.19496	0.4724	1.97	0.00244	CID (Collision Induced Dissociation)	MS2	78.6556	8953	DG009790_Gallo_30.raw	0/0		4.53			0	0.00794
High	Sequest HT (A2)	Rejected	1	f3.19496	f3.19496		0.88	0.00082	CID (Collision Induced Dissociation)	MS2	79.2249	8805	DG009795_Gallo_32.raw	0/0		4.95	28415472	79.18	0	0.0131
High	Sequest HT (A2)	Unambiguous	1	f3.19496	f3.19496	0.3086	2.88	0.00225	CID (Collision Induced Dissociation)	MS2	79.5125	9109	DG009795_Gallo_32.raw	0/0		2.43	1.95273e+07	79.45	0	0.02439
High	Sequest HT (A2)	Unambiguous	2	f2.19411; f3.19496	f2.19411; f3.19496	0.3177	3	0.00281	CID (Collision Induced Dissociation)	MS2	78.7568	8598	DG009795_Gallo_32.raw	0/0		3.84	1.27194e+06	78.7	0	0.1061
High	Sequest HT (A2)	Unambiguous	2	f2.19411; f3.19496	f2.19411; f3.19496	0.5016	2.3	0.00162	CID (Collision Induced Dissociation)	MS2	78.5516	8574	DG009795_Gallo_32.raw	0/0		3.11	207948	78.55	0	0.008524
High	Sequest HT (A2)	Unambiguous	2	f2.19411; f3.19496	f2.19411; f3.19496	0.5212	2.56	0.0018	CID (Collision Induced Dissociation)	MS2	61.0867	6616	DG009800_Gallo_36.raw	0/0		3.78	2.10736e+06	61.15	0	0.006439
High	Sequest HT (A2)	Unambiguous	2	f2.19411; f3.19496	f2.19411; f3.19496	0.2956	0.8	0.00048	CID (Collision Induced Dissociation)	MS2	59.4001	6450	DG009800_Gallo_36.raw	0/0		3.18	384775	59.46	0	0.04132
High	Sequest HT (A2)	Unambiguous	2	f2.19411; f3.19496	f2.19411; f3.19496	0.1505	0.94	0.00047	CID (Collision Induced Dissociation)	MS2	59.2547	6436	DG009800_Gallo_36.raw	0/0		2.06	297203	59.25	0	0.09264
High	Sequest HT (A2)	Unambiguous	2	f2.19411; f3.19496	f2.19411; f3.19496	0.5548	3.2	0.003	CID (Collision Induced Dissociation)	MS2	73.782	8013	DG009795_Gallo_32.raw	0/0		6.2	7.37963e+06	73.87	0	0.005097
High	Sequest HT (A2)	Unambiguous	2	f2.19411; f3.19496	f2.19411; f3.19496	0.4413	2.79	0.00195	CID (Collision Induced Dissociation)	MS2	69.1709	7449	DG009795_Gallo_32.raw	0/0		3.58	327984	69.13	0	0.00915
High	Sequest HT (A2)	Unambiguous	2	f2.19411; f3.19496	f2.19411; f3.19496	0.466	1.45	0.00164	CID (Collision Induced Dissociation)	MS2	77.4779	8472	DG009795_Gallo_32.raw	0/0		3.24	583991	77.5	0	0.003845
High	Sequest HT (A2)	Unambiguous	2	f2.19411; f3.19496	f2.19411; f3.19496	0.3513	3.53	0.0033	CID (Collision Induced Dissociation)	MS2	74.336	8078	DG009795_Gallo_32.raw	0/0		5.01	108244	74.38	0	0.01009
High	Sequest HT (A2)	Unambiguous	2	f2.19411; f3.19496	f2.19411; f3.19496	0.4786	3.66	0.00342	CID (Collision Induced Dissociation)	MS2	76.059	8287	DG009795_Gallo_32.raw	0/0		4.43	651194	76.14	0	0.01299
High	Sequest HT (A2)	Unambiguous	2	f2.19411; f3.19496	f2.19411; f3.19496	0.3959	0.01	1e-05	CID (Collision Induced Dissociation)	MS2	75.3973	8211	DG009795_Gallo_32.raw	0/0		4.42	123910	75.33	0	0.0162
High	Sequest HT (A2)	Unambiguous	2	f2.19411; f3.19496	f2.19411; f3.19496	0.1981	0.2	0.00019	CID (Collision Induced Dissociation)	MS2	74.8538	8146	DG009795_Gallo_32.raw	0/0		3.08	221780	74.82	0	0.02545
High	Sequest HT (A2)	Unambiguous	2	f2.19411; f3.19496	f2.19411; f3.19496	0.5409	1.05	0.00098	CID (Collision Induced Dissociation)	MS2	73.5481	8095	DG009790_Gallo_30.raw	0/0		5.99	2.57705e+07	73.64	0	0.0001265
High	Sequest HT (A2)	Unambiguous	2	f2.19411; f3.19496	f2.19411; f3.19496	0.2259	0.68	0.00036	CID (Collision Induced Dissociation)	MS2	58.464	6213	DG009790_Gallo_30.raw	0/0		3.01	982535	58.49	0	0.1064
High	Sequest HT (A2)	Unambiguous	2	f2.19411; f3.19496	f2.19411; f3.19496	0.5206	-24.17	-0.02264	CID (Collision Induced Dissociation)	MS2	73.5074	8089	DG009790_Gallo_30.raw	0/0		6.07			0	0.01412
High	Sequest HT (A2)	Unambiguous	2	f2.19411; f3.19496	f2.19411; f3.19496	0.3154	1.72	0.00103	CID (Collision Induced Dissociation)	MS2	59.4162	6322	DG009790_Gallo_30.raw	0/0		2.98	664200	59.42	0	0.06491
High	Sequest HT (A2)	Unambiguous	3	f2.19411; f3.19496; f2.19392	f2.19411; f3.19496; f2.19392	0.327	1.8	0.00111	CID (Collision Induced Dissociation)	MS2	26.7048	2848	DG009790_Gallo_30.raw	0/0		3.15	569085	26.74	0	0.02796
High	Sequest HT (A2)	Rejected	1	f3.19496	f3.19496		1.29	0.00101	CID (Collision Induced Dissociation)	MS2	66.6862	7178	DG009790_Gallo_30.raw	0/0		3.7	2.52057e+06	66.77	0	0.002451
High	Sequest HT (A2)	Unambiguous	2	f2.19411; f3.19496	f2.19411; f3.19496	0.4718	2.96	0.00207	CID (Collision Induced Dissociation)	MS2	69.1363	7495	DG009790_Gallo_30.raw	0/0		3.37			0	0.0383
High	Sequest HT (A2)	Unambiguous	2	f2.19411; f3.19496	f2.19411; f3.19496	0.4318	2.56	0.0018	CID (Collision Induced Dissociation)	MS2	61.0547	6497	DG009790_Gallo_30.raw	0/0		3.96	7.36177e+06	61.17	0	0.007717
High	Sequest HT (A2)	Unambiguous	2	f2.19411; f3.19496	f2.19411; f3.19496	0.3817	2.64	0.00186	CID (Collision Induced Dissociation)	MS2	61.6066	6565	DG009790_Gallo_30.raw	0/0		2.62	7.36177e+06	61.17	0	0.02849
High	Sequest HT (A2)	Selected	1	f3.19496	f3.19496	0.003	0.6	0.00055	CID (Collision Induced Dissociation)	MS2	79.3263	8898	DG009795_Gallo_32.raw	0/0		3.36	1.31658e+07	79.29	0.003364	0.1153
High	Sequest HT (A2)	Unambiguous	1	f3.19496	f3.19496	0.1538	3.27	0.00256	CID (Collision Induced Dissociation)	MS2	82.1235	9734	DG009795_Gallo_32.raw	0/0		2.34	379185	82.11	0.003364	0.1396
High	Sequest HT (A2)	Unambiguous	2	f2.19411; f3.19496	f2.19411; f3.19496	0.3232	3.25	0.00229	CID (Collision Induced Dissociation)	MS2	63.1649	6752	DG009795_Gallo_32.raw	0/0		2.63	176952	63.02	0.003364	0.143
High	Sequest HT (A2)	Unambiguous	3	f2.19411; f3.19496; f2.19392	f2.19411; f3.19496; f2.19392	0.316	2.07	0.00115	CID (Collision Induced Dissociation)	MS2	27.4325	2954	DG009795_Gallo_32.raw	0/0		2.88	362738	27.41	0.003364	0.1097
High	Sequest HT (A2)	Unambiguous	2	f2.19411; f3.19496	f2.19411; f3.19496	0.2483	2.81	0.00199	CID (Collision Induced Dissociation)	MS2	67.675	7275	DG009795_Gallo_32.raw	0/0		2.86	117615	67.65	0.003364	0.1167
High	Sequest HT (A2)	Unambiguous	2	f2.19411; f3.19496	f2.19411; f3.19496	0.2508	2.31	0.00121	CID (Collision Induced Dissociation)	MS2	58.3968	6240	DG009795_Gallo_32.raw	0/0		3.07	3.00061e+06	58.49	0.005932	0.1594
High	Sequest HT (A2)	Unambiguous	2	f2.19411; f3.19496	f2.19411; f3.19496	0.2933	3.59	0.00253	CID (Collision Induced Dissociation)	MS2	66.3491	7119	DG009795_Gallo_32.raw	0/0		2.25	268862	65.99	0.005932	0.1995
Unknown (EF hand)	r3.14267	NVMSKLTRVIVTSIMTVGFLTATLGLTAGNADAKLEGNGTLSQKQYQRLASQQF	70.3704	13	35	5.8	652376	5.87491e+06	1.5585e+07	890926
Confidence	Identifying Node	PSM Ambiguity	# Proteins	Master Protein Accessions	Protein Accessions	DeltaScore	DeltaM [ppm]	Deltam/z [Da]	Activation Type	MS Order	RT [min]	First Scan	Spectrum File	Ions Matched	Annotation	XCorr	Area	Apex RT [min]	Percolator q-Value	Percolator PEP
High	Sequest HT (A2)	Unambiguous	1	r3.14267	r3.14267	0.1315	3.39	0.00304	CID (Collision Induced Dissociation)	MS2	52.2283	5582	DG009795_Gallo_32.raw	0/0		2.13	8.03418e+06	52.24	0	0.03475
High	Sequest HT (A2)	Unambiguous	1	r3.14267	r3.14267	0.2768	4.71	0.00562	CID (Collision Induced Dissociation)	MS2	52.2504	5584	DG009795_Gallo_32.raw	0/0		2.89			0	0.01487
High	Sequest HT (A2)	Unambiguous	2	r3.14267	r3.14267; r1.27087	0.4084	2.97	0.00191	CID (Collision Induced Dissociation)	MS2	52.401	5602	DG009795_Gallo_32.raw	0/0		3.82	2.92321e+06	52.52	0	0.005168
High	Sequest HT (A2)	Unambiguous	1	r3.14267	r3.14267	0.3993	1.94	0.0018	CID (Collision Induced Dissociation)	MS2	56.2893	6010	DG009795_Gallo_32.raw	0/0		2.98	7.86871e+06	56.3	0	0.01946
High	Sequest HT (A2)	Selected	2	r3.14267	r3.14267; r1.27087	0.0156	3.29	0.00283	CID (Collision Induced Dissociation)	MS2	66.425	7133	DG009795_Gallo_32.raw	0/0		2.57	3.38839e+06	66.46	0	0.0294
High	Sequest HT (A2)	Unambiguous	1	r3.14267	r3.14267	0.3614	3.58	0.00311	CID (Collision Induced Dissociation)	MS2	51.4883	5502	DG009795_Gallo_32.raw	0/0		4.04	2.03828e+06	51.53	0	0.02846
High	Sequest HT (A2)	Unambiguous	2	r3.14267	r3.14267; r1.27087	0.4332	1.81	0.00135	CID (Collision Induced Dissociation)	MS2	75.6967	8426	DG009790_Gallo_30.raw	0/0		3.74	2.9256e+06	75.77	0	0.006974
High	Sequest HT (A2)	Unambiguous	2	r3.14267	r3.14267; r1.27087	0.4155	2.26	0.0014	CID (Collision Induced Dissociation)	MS2	75.0926	8323	DG009790_Gallo_30.raw	0/0		3.61	1.61479e+07	75.22	0	0.004558
High	Sequest HT (A2)	Unambiguous	2	r3.14267	r3.14267; r1.27087	0.3401	1.94	0.00114	CID (Collision Induced Dissociation)	MS2	67.0575	7213	DG009795_Gallo_32.raw	0/0		2.97	4.28603e+06	67.12	0	0.01161
High	Sequest HT (A2)	Unambiguous	2	r3.14267	r3.14267; r1.27087	0.4514	2.2	0.00158	CID (Collision Induced Dissociation)	MS2	68.0456	7326	DG009795_Gallo_32.raw	0/0		3.81	736268	68.05	0	0.006657
High	Sequest HT (A2)	Unambiguous	2	r3.14267	r3.14267; r1.27087	0.3841	0.78	0.00048	CID (Collision Induced Dissociation)	MS2	75.3431	8003	DG009800_Gallo_36.raw	0/0		3.28	451899	75.36	0	0.0148
High	Sequest HT (A2)	Unambiguous	2	r3.14267	r3.14267; r1.27087	0.297	1.21	0.00071	CID (Collision Induced Dissociation)	MS2	67.2369	7226	DG009800_Gallo_36.raw	0/0		2.66	706123	67.15	0	0.03832
High	Sequest HT (A2)	Unambiguous	2	r3.14267	r3.14267; r1.27087	0.4081	2.21	0.00143	CID (Collision Induced Dissociation)	MS2	52.439	5744	DG009800_Gallo_36.raw	0/0		3.21	1.65982e+06	52.55	0	0.004924
High	Sequest HT (A2)	Selected	1	r3.14267	r3.14267	0.0389	4.07	0.00365	CID (Collision Induced Dissociation)	MS2	52.2332	5724	DG009800_Gallo_36.raw	0/0		2.83	628780	52.14	0	0.05642
High	Sequest HT (A2)	Unambiguous	2	r3.14267	r3.14267; r1.27087	0.2868	0.84	0.00044	CID (Collision Induced Dissociation)	MS2	50.1593	5500	DG009800_Gallo_36.raw	0/0		2.58	1.00801e+06	50.21	0	0.08927
High	Sequest HT (A2)	Unambiguous	1	r3.14267	r3.14267	0.1705	2.51	0.00251	CID (Collision Induced Dissociation)	MS2	69.9639	7546	DG009795_Gallo_32.raw	0/0		2.58	1.05272e+08	70.03	0	0.08039
High	Sequest HT (A2)	Unambiguous	2	r3.14267	r3.14267; r1.27087	0.1186	0.18	0.00011	CID (Collision Induced Dissociation)	MS2	75.6685	8238	DG009795_Gallo_32.raw	0/0		2.36	99260.9	75.61	0	0.0468
High	Sequest HT (A2)	Unambiguous	2	r3.14267	r3.14267; r1.27087	0.4613	2.36	0.00146	CID (Collision Induced Dissociation)	MS2	75.1372	8178	DG009795_Gallo_32.raw	0/0		3.75	1.82404e+07	75.26	0	0.009492
High	Sequest HT (A2)	Unambiguous	2	r3.14267	r3.14267; r1.27087	0.5	1.81	0.00135	CID (Collision Induced Dissociation)	MS2	75.9033	8268	DG009795_Gallo_32.raw	0/0		4.5	3.06202e+06	75.83	0	0.001041
High	Sequest HT (A2)	Unambiguous	1	r3.14267	r3.14267	0.469	2.76	0.0033	CID (Collision Induced Dissociation)	MS2	52.2229	5546	DG009790_Gallo_30.raw	0/0		4.35	790031	52.23	0	0.003392
High	Sequest HT (A2)	Selected	1	r3.14267	r3.14267	0.0052	1.48	0.00137	CID (Collision Induced Dissociation)	MS2	56.3358	5985	DG009790_Gallo_30.raw	0/0		1.93	1.28909e+07	56.32	0	0.02127
High	Sequest HT (A2)	Unambiguous	1	r3.14267	r3.14267	0.2209	2.37	0.00212	CID (Collision Induced Dissociation)	MS2	52.0929	5533	DG009790_Gallo_30.raw	0/0		3.35	1.19157e+07	52.22	0	0.003932
High	Sequest HT (A2)	Unambiguous	1	r3.14267	r3.14267	0.2429	2.32	0.00202	CID (Collision Induced Dissociation)	MS2	51.4651	5467	DG009790_Gallo_30.raw	0/0		3.17	2.76641e+06	51.52	0	0.003989
High	Sequest HT (A2)	Unambiguous	1	r3.14267	r3.14267	0.0532	2.58	0.0022	CID (Collision Induced Dissociation)	MS2	50.8722	5403	DG009790_Gallo_30.raw	0/0		3.01	6.33417e+06	50.9	0	0.006468
High	Sequest HT (A2)	Unambiguous	2	r3.14267	r3.14267; r1.27087	0.2314	3.93	0.00293	CID (Collision Induced Dissociation)	MS2	75.9818	8685	DG009785_Gallo_26.raw	0/0		2.55	191465	75.9	0	0.02919
High	Sequest HT (A2)	Unambiguous	2	r3.14267	r3.14267; r1.27087	0.3051	1.94	0.00114	CID (Collision Induced Dissociation)	MS2	67.2136	7598	DG009785_Gallo_26.raw	0/0		2.95	705679	67.17	0	0.006547
High	Sequest HT (A2)	Unambiguous	2	r3.14267	r3.14267; r1.27087	0.3681	2.88	0.00185	CID (Collision Induced Dissociation)	MS2	52.6179	6005	DG009785_Gallo_26.raw	0/0		3.83	1.21836e+06	52.59	0	0.007679
High	Sequest HT (A2)	Unambiguous	2	r3.14267	r3.14267; r1.27087	0.2522	2.03	0.00105	CID (Collision Induced Dissociation)	MS2	50.1663	5323	DG009790_Gallo_30.raw	0/0		2.3	1.10287e+06	50.21	0	0.06351
High	Sequest HT (A2)	Unambiguous	2	r3.14267	r3.14267; r1.27087	0.0725	2.8	0.0024	CID (Collision Induced Dissociation)	MS2	66.182	7101	DG009790_Gallo_30.raw	0/0		2.76	6.50275e+06	66.3	0	0.001658
High	Sequest HT (A2)	Unambiguous	2	r3.14267	r3.14267; r1.27087	0.3021	2.04	0.0012	CID (Collision Induced Dissociation)	MS2	67.1091	7236	DG009790_Gallo_30.raw	0/0		2.88	3.13002e+06	67.08	0	0.004333
High	Sequest HT (A2)	Unambiguous	2	r3.14267	r3.14267; r1.27087	0.3932	2.88	0.00207	CID (Collision Induced Dissociation)	MS2	68.0609	7353	DG009790_Gallo_30.raw	0/0		3.84	440738	68.03	0	0.001313
High	Sequest HT (A2)	Unambiguous	2	r3.14267	r3.14267; r1.27087	0.1667	3.1	0.00297	CID (Collision Induced Dissociation)	MS2	67.5894	7292	DG009790_Gallo_30.raw	0/0		2.88	466984	67.57	0	0.01292
High	Sequest HT (A2)	Unambiguous	2	r3.14267	r3.14267; r1.27087	0.0722	-15.42	-0.00953	CID (Collision Induced Dissociation)	MS2	75.9004	8470	DG009790_Gallo_30.raw	0/0		1.94	371787	75.85	0.003364	0.1244
High	Sequest HT (A2)	Unambiguous	2	r3.14267	r3.14267; r1.27087	0.3028	2.15	0.00111	CID (Collision Induced Dissociation)	MS2	50.2078	5766	DG009785_Gallo_26.raw	0/0		2.51	494003	50.24	0.005932	0.1911
High	Sequest HT (A2)	Unambiguous	2	r3.14267	r3.14267; r1.27087	0.2738	2.06	0.00127	CID (Collision Induced Dissociation)	MS2	75.7785	8442	DG009790_Gallo_30.raw	0/0		2.63	1.61479e+07	75.22	0.005932	0.1625
HP-1531-like family	r2.10559	LYASYLIHITIEVEKVKEVIDMLILALLKKSIEFFNDTFNNKK	51.1628	6	45	5.1	1.15912e+07	1.33102e+08	2.47993e+07	563373
Confidence	Identifying Node	PSM Ambiguity	# Proteins	Master Protein Accessions	Protein Accessions	DeltaScore	DeltaM [ppm]	Deltam/z [Da]	Activation Type	MS Order	RT [min]	First Scan	Spectrum File	Ions Matched	Annotation	XCorr	Area	Apex RT [min]	Percolator q-Value	Percolator PEP
High	Sequest HT (A2)	Unambiguous	1	r2.10559	r2.10559	0.2817	2.1	0.0012	CID (Collision Induced Dissociation)	MS2	56.0854	5982	DG009795_Gallo_32.raw	0/0		2.52	1.93949e+07	56.24	0	0.05252
High	Sequest HT (A2)	Unambiguous	1	r2.10559	r2.10559	0.4606	0.71	0.00059	CID (Collision Induced Dissociation)	MS2	79.1529	9047	DG009790_Gallo_30.raw	0/0		5.58	1.87435e+07	79.15	0	0.0002014
High	Sequest HT (A2)	Unambiguous	1	r2.10559	r2.10559	0.3818	-10.28	-0.00675	CID (Collision Induced Dissociation)	MS2	79.6325	9217	DG009790_Gallo_30.raw	0/0		3.3			0	0.02476
High	Sequest HT (A2)	Unambiguous	1	r2.10559	r2.10559	0.416	2.76	0.00172	CID (Collision Induced Dissociation)	MS2	79.5486	9191	DG009790_Gallo_30.raw	0/0		3.63			0	0.002451
High	Sequest HT (A2)	Unambiguous	1	r2.10559	r2.10559	0.2206	-0.05	-4e-05	CID (Collision Induced Dissociation)	MS2	79.1414	8745	DG009795_Gallo_32.raw	0/0		2.72	32084592	79.12	0	0.02174
High	Sequest HT (A2)	Unambiguous	1	r2.10559	r2.10559	0.2637	-0.63	-0.00041	CID (Collision Induced Dissociation)	MS2	79.137	8740	DG009795_Gallo_32.raw	0/0		2.73	4.62997e+07	79.12	0	0.002853
High	Sequest HT (A2)	Unambiguous	1	r2.10559	r2.10559	0.2852	1.14	0.00065	CID (Collision Induced Dissociation)	MS2	56.6992	6020	DG009790_Gallo_30.raw	0/0		2.7	3.6824e+07	56.3	0	0.08366
High	Sequest HT (A2)	Unambiguous	1	r2.10559	r2.10559	0.229	1.25	0.00071	CID (Collision Induced Dissociation)	MS2	57.2097	6079	DG009790_Gallo_30.raw	0/0		2.62	1.54074e+06	57.23	0	0.07812
High	Sequest HT (A2)	Unambiguous	1	r2.10559	r2.10559	0.3176	1.78	0.00102	CID (Collision Induced Dissociation)	MS2	57.7662	6139	DG009790_Gallo_30.raw	0/0		2.96	335640	57.85	0	0.06394
High	Sequest HT (A2)	Unambiguous	1	r2.10559	r2.10559	0.274	0.49	0.00019	HCD (High Energy Collision Dissociation)	MS2	57.8639	6148	DG009790_Gallo_30.raw	0/0		2.08	297123	57.8	0	0.06226
High	Sequest HT (A2)	Unambiguous	1	r2.10559	r2.10559	0.1779	1.35	0.00077	CID (Collision Induced Dissociation)	MS2	58.2751	6192	DG009790_Gallo_30.raw	0/0		2.53	605741	58.12	0	0.04336
High	Sequest HT (A2)	Unambiguous	1	r2.10559	r2.10559	0.1469	1.78	0.00102	CID (Collision Induced Dissociation)	MS2	59.8547	6368	DG009790_Gallo_30.raw	0/0		2.45	106234	59.87	0	0.07166
High	Sequest HT (A2)	Unambiguous	1	r2.10559	r2.10559	0.284	1.67	0.00096	CID (Collision Induced Dissociation)	MS2	59.3388	6310	DG009790_Gallo_30.raw	0/0		2.5	585384	59.29	0	0.05797
High	Sequest HT (A2)	Unambiguous	1	r2.10559	r2.10559	0.2235	1.99	0.00114	CID (Collision Induced Dissociation)	MS2	58.7816	6243	DG009790_Gallo_30.raw	0/0		2.55	489622	58.5	0	0.07675
High	Sequest HT (A2)	Unambiguous	1	r2.10559	r2.10559	0.214	1.61	0.00061	HCD (High Energy Collision Dissociation)	MS2	56.4038	6412	DG009785_Gallo_26.raw	0/0		2.43	2.79392e+06	56.43	0	0.05401
High	Sequest HT (A2)	Unambiguous	1	r2.10559	r2.10559	0.1888	2.74	0.00157	CID (Collision Induced Dissociation)	MS2	56.259	6399	DG009785_Gallo_26.raw	0/0		2.49	1.15912e+07	56.42	0	0.05972
High	Sequest HT (A2)	Unambiguous	1	r2.10559	r2.10559	0.0737	1.67	0.00096	CID (Collision Induced Dissociation)	MS2	60.369	6424	DG009790_Gallo_30.raw	0/0		2.17	271541	60.32	0	0.05992
High	Sequest HT (A2)	Unambiguous	1	r2.10559	r2.10559	0.2	1.8	0.00094	CID (Collision Induced Dissociation)	MS2	64.5117	6897	DG009790_Gallo_30.raw	0/0		2.7	8.9131e+07	64.67	0	0.07508
High	Sequest HT (A2)	Unambiguous	1	r2.10559	r2.10559	0.1741	1.57	0.00082	CID (Collision Induced Dissociation)	MS2	65.0475	6958	DG009790_Gallo_30.raw	0/0		2.7	8.9131e+07	64.67	0	0.039
High	Sequest HT (A2)	Unambiguous	1	r2.10559	r2.10559	0.2842	2.49	0.00141	CID (Collision Induced Dissociation)	MS2	65.531	7014	DG009790_Gallo_30.raw	0/0		2.85	6.41016e+06	65.65	0	0.09101
High	Sequest HT (A2)	Unambiguous	1	r2.10559	r2.10559	0.1643	1.34	0.0007	CID (Collision Induced Dissociation)	MS2	65.621	7024	DG009790_Gallo_30.raw	0/0		2.13			0	0.06187
High	Sequest HT (A2)	Unambiguous	1	r2.10559	r2.10559	0.2369	1.24	0.00086	CID (Collision Induced Dissociation)	MS2	67.0939	7233	DG009790_Gallo_30.raw	0/0		2.49	3.45266e+07	67.39	0	0.0104
High	Sequest HT (A2)	Unambiguous	1	r2.10559	r2.10559	0.2406	2.03	0.00141	CID (Collision Induced Dissociation)	MS2	67.6043	7294	DG009790_Gallo_30.raw	0/0		2.66	3.45266e+07	67.39	0	0.03841
High	Sequest HT (A2)	Unambiguous	1	r2.10559	r2.10559	0.1685	1.99	0.00114	CID (Collision Induced Dissociation)	MS2	62.0336	6611	DG009790_Gallo_30.raw	0/0		2.67			0	0.0465
High	Sequest HT (A2)	Unambiguous	1	r2.10559	r2.10559	0.1739	1.89	0.00108	CID (Collision Induced Dissociation)	MS2	62.5139	6666	DG009790_Gallo_30.raw	0/0		2.53	129825	62.56	0	0.04513
High	Sequest HT (A2)	Unambiguous	1	r2.10559	r2.10559	0.1441	1.73	0.00098	CID (Collision Induced Dissociation)	MS2	65.618	7037	DG009795_Gallo_32.raw	0/0		2.22	477138	65.66	0.003364	0.1257
High	Sequest HT (A2)	Unambiguous	1	r2.10559	r2.10559	0.1222	1.62	0.00074	CID (Collision Induced Dissociation)	MS2	50.7769	5393	DG009790_Gallo_30.raw	0/0		1.8			0.003364	0.1374
High	Sequest HT (A2)	Unambiguous	1	r2.10559	r2.10559	0.1773	0.35	0.00019	CID (Collision Induced Dissociation)	MS2	55.1397	5862	DG009790_Gallo_30.raw	0/0		2.2	5.54823e+08	55.4	0.003364	0.1548
High	Sequest HT (A2)	Unambiguous	1	r2.10559	r2.10559	0.2407	0.82	0.00047	CID (Collision Induced Dissociation)	MS2	56.1834	5968	DG009790_Gallo_30.raw	0/0		2.16	3.6824e+07	56.3	0.003364	0.1253
High	Sequest HT (A2)	Unambiguous	1	r2.10559	r2.10559	0.1579	1.51	0.0008	CID (Collision Induced Dissociation)	MS2	65.1319	6966	DG009790_Gallo_30.raw	0/0		2.28	142699	65.12	0.003364	0.139
High	Sequest HT (A2)	Unambiguous	1	r2.10559	r2.10559	0.094	1.99	0.00114	CID (Collision Induced Dissociation)	MS2	63.0523	6724	DG009790_Gallo_30.raw	0/0		2.34	239126	62.88	0.005932	0.1962
High	Sequest HT (A2)	Unambiguous	1	r2.10559	r2.10559	0.0733	0.82	0.00043	CID (Collision Induced Dissociation)	MS2	55.3746	6048	DG009800_Gallo_36.raw	0/0		1.91	563373	55.41	0.005932	0.1716
High	Sequest HT (A2)	Unambiguous	1	r2.10559	r2.10559	0.1491	1.51	0.0008	CID (Collision Induced Dissociation)	MS2	60.3492	6421	DG009790_Gallo_30.raw	0/0		2.28			0.005932	0.2039
High	Sequest HT (A2)	Unambiguous	1	r2.10559	r2.10559	0.1598	1.39	0.00074	CID (Collision Induced Dissociation)	MS2	57.7563	6138	DG009790_Gallo_30.raw	0/0		2.44	2.47796e+06	57.81	0.005932	0.2003
High	Sequest HT (A2)	Unambiguous	1	r2.10559	r2.10559	0.1913	1.51	0.0008	CID (Collision Induced Dissociation)	MS2	55.2295	5897	DG009795_Gallo_32.raw	0/0		2.3	8.70313e+06	55.37	0.005932	0.1621
High	Sequest HT (A2)	Unambiguous	1	r2.10559	r2.10559	0.2176	1.39	0.00074	CID (Collision Induced Dissociation)	MS2	64.0738	6847	DG009790_Gallo_30.raw	0/0		2.39	3.35204e+06	63.63	0.005932	0.1845
High	Sequest HT (A2)	Selected	1	r2.10559	r2.10559	0.0175	0.95	0.00044	HCD (High Energy Collision Dissociation)	MS2	67.1251	7238	DG009790_Gallo_30.raw	0/0		1.71	9.18769e+06	67.26	0.005932	0.1787
High	Sequest HT (A2)	Unambiguous	1	r2.10559	r2.10559	0.1596	1.45	0.00076	CID (Collision Induced Dissociation)	MS2	67.2985	7258	DG009790_Gallo_30.raw	0/0		2.13	327226	67.36	0.005932	0.1889
High	Sequest HT (A2)	Unambiguous	1	r2.10559	r2.10559	0.1404	1.39	0.00074	CID (Collision Induced Dissociation)	MS2	63.5422	6780	DG009790_Gallo_30.raw	0/0		2.28	3.35204e+06	63.63	0.005932	0.1957
High	Sequest HT (A2)	Unambiguous	1	r2.10559	r2.10559	0.2098	1.51	0.0008	CID (Collision Induced Dissociation)	MS2	61.37	6534	DG009790_Gallo_30.raw	0/0		2.24	629197	61.3	0.005932	0.173
High	Sequest HT (A2)	Unambiguous	1	r2.10559	r2.10559	0.2103	0.93	0.00049	CID (Collision Induced Dissociation)	MS2	62.4433	6659	DG009790_Gallo_30.raw	0/0		2.33			0.005932	0.1765
High	Sequest HT (A2)	Unambiguous	1	r2.10559	r2.10559	0.2112	1.05	0.00055	CID (Collision Induced Dissociation)	MS2	64.6162	6910	DG009790_Gallo_30.raw	0/0		2.32	343818	64.61	0.005932	0.1599
High	Sequest HT (A2)	Unambiguous	1	r2.10559	r2.10559	0.2609	0.01	0	HCD (High Energy Collision Dissociation)	MS2	56.2025	5971	DG009790_Gallo_30.raw	0/0		2.3	6.30628e+06	56.27	0.005932	0.1625
High	Sequest HT (A2)	Unambiguous	1	r2.10559	r2.10559	0.1121	0.93	0.00049	CID (Collision Induced Dissociation)	MS2	58.2658	6191	DG009790_Gallo_30.raw	0/0		2.14	3.79553e+06	58.18	0.005932	0.1853
High	Sequest HT (A2)	Unambiguous	1	r2.10559	r2.10559	0.0996	1.48	0.00068	CID (Collision Induced Dissociation)	MS2	50.2254	5331	DG009790_Gallo_30.raw	0/0		2.51	2.05947e+07	50.32	0.008844	0.2065
Acyl carrier protein	f1.20423	KTVENFDKVKDIIVDRLGV…...........DEFGTEIPDEEAEKINTVGDAVNYINTLEK	32.9114	8	11	8.8		4.00744e+06	732001
Confidence	Identifying Node	PSM Ambiguity	# Proteins	Master Protein Accessions	Protein Accessions	DeltaScore	DeltaM [ppm]	Deltam/z [Da]	Activation Type	MS Order	RT [min]	First Scan	Spectrum File	Ions Matched	Annotation	XCorr	Area	Apex RT [min]	Percolator q-Value	Percolator PEP
High	Sequest HT (A2)	Unambiguous	1	f1.20423	f1.20423	0.5141	0.9	0.00069	CID (Collision Induced Dissociation)	MS2	53.1129	5681	DG009795_Gallo_32.raw	0/0		3.89	660665	53.1	0	0.001236
High	Sequest HT (A2)	Unambiguous	1	f1.20423	f1.20423	0.3264	3.89	0.00321	CID (Collision Induced Dissociation)	MS2	57.7299	6170	DG009795_Gallo_32.raw	0/0		2.42	153408	57.73	0	0.07246
High	Sequest HT (A2)	Unambiguous	1	f1.20423	f1.20423	0.2887	2.14	0.00208	CID (Collision Induced Dissociation)	MS2	66.9868	7202	DG009795_Gallo_32.raw	0/0		3.81	1.03756e+06	67.05	0	0.0257
High	Sequest HT (A2)	Unambiguous	1	f1.20423	f1.20423	0.2347	1.93	0.00123	CID (Collision Induced Dissociation)	MS2	45.573	4862	DG009795_Gallo_32.raw	0/0		2.77	510863	45.57	0	0.01654
High	Sequest HT (A2)	Unambiguous	1	f1.20423	f1.20423	0.5528	1.38	0.00106	CID (Collision Induced Dissociation)	MS2	53.1126	5641	DG009790_Gallo_30.raw	0/0		4.07	3.72901e+06	53.16	0	0.0006002
High	Sequest HT (A2)	Unambiguous	1	f1.20423	f1.20423	0.4273	1.11	0.00077	CID (Collision Induced Dissociation)	MS2	57.3385	6093	DG009790_Gallo_30.raw	0/0		5.43	3.48883e+06	57.37	0	0.0003187
High	Sequest HT (A2)	Unambiguous	1	f1.20423	f1.20423	0.4327	1.13	0.00088	CID (Collision Induced Dissociation)	MS2	59.6737	6348	DG009790_Gallo_30.raw	0/0		4.9	2.55769e+06	59.78	0	0.001087
High	Sequest HT (A2)	Unambiguous	1	f1.20423	f1.20423	0.2353	2.19	0.00128	CID (Collision Induced Dissociation)	MS2	37.3953	3982	DG009790_Gallo_30.raw	0/0		2.72	3.02772e+06	37.45	0	0.04016
High	Sequest HT (A2)	Unambiguous	1	f1.20423	f1.20423	0.4087	2.21	0.00214	CID (Collision Induced Dissociation)	MS2	66.9065	7206	DG009790_Gallo_30.raw	0/0		5.26	7.23397e+06	66.92	0	8.55649e-06
High	Sequest HT (A2)	Unambiguous	1	f1.20423	f1.20423	0.2043	0.12	0.0001	CID (Collision Induced Dissociation)	MS2	64.9253	6953	DG009795_Gallo_32.raw	0/0		2.79			0.003364	0.115
High	Sequest HT (A2)	Unambiguous	1	f1.20423	f1.20423	0.2048	2.61	0.00152	CID (Collision Induced Dissociation)	MS2	37.2823	3982	DG009795_Gallo_32.raw	0/0		2.49	1.29751e+06	37.35	0.003364	0.1321
Delta hemolysin	f2.2413	YFVFFAQFTHTKDLNIYLSMEITTIMEEVAIMAQDIISTVIDFIKLIAETVQKFTK	39.2857	6	11	6.5		865397607	1.90299e+07
Confidence	Identifying Node	PSM Ambiguity	# Proteins	Master Protein Accessions	Protein Accessions	DeltaScore	DeltaM [ppm]	Deltam/z [Da]	Activation Type	MS Order	RT [min]	First Scan	Spectrum File	Ions Matched	Annotation	XCorr	Area	Apex RT [min]	Percolator q-Value	Percolator PEP
High	Sequest HT (A2)	Unambiguous	1	f2.2413	f2.2413	0.285	4.46	0.00383	CID (Collision Induced Dissociation)	MS2	81.5853	9600	DG009790_Gallo_30.raw	0/0		2	73231.7	81.49	0	0.07009
High	Sequest HT (A2)	Unambiguous	1	f2.2413	f2.2413	0.4135	1.19	0.00102	CID (Collision Induced Dissociation)	MS2	79.888	9332	DG009790_Gallo_30.raw	0/0		3.7	1701579460	79.3	0	0.00389
High	Sequest HT (A2)	Unambiguous	1	f2.2413	f2.2413	0.429	0.07	6e-05	CID (Collision Induced Dissociation)	MS2	79.4101	9141	DG009790_Gallo_30.raw	0/0		3.17	29215754	79.39	0	0.02522
High	Sequest HT (A2)	Unambiguous	1	f2.2413	f2.2413	0.3493	0.83	0.00071	CID (Collision Induced Dissociation)	MS2	81.0552	9545	DG009790_Gallo_30.raw	0/0		2.72	132421	81.17	0	0.04984
High	Sequest HT (A2)	Unambiguous	1	f2.2413	f2.2413	0.3489	-2.18	-0.00125	HCD (High Energy Collision Dissociation)	MS2	79.507	9103	DG009795_Gallo_32.raw	0/0		3.21	1.4977e+06	79.46	0	0.08694
High	Sequest HT (A2)	Unambiguous	1	f2.2413	f2.2413	0.4461	1.78	0.00134	CID (Collision Induced Dissociation)	MS2	79.4968	9092	DG009795_Gallo_32.raw	0/0		3.34	3.52761e+07	79.46	0	0.001812
High	Sequest HT (A2)	Unambiguous	1	f2.2413	f2.2413	0.212	-0.21	-0.00017	CID (Collision Induced Dissociation)	MS2	79.3579	8933	DG009795_Gallo_32.raw	0/0		2.5	36559336	79.31	0	0.01058
High	Sequest HT (A2)	Unambiguous	1	f2.2413	f2.2413	0.2744	5.41	0.00426	CID (Collision Induced Dissociation)	MS2	80.8109	9586	DG009795_Gallo_32.raw	0/0		2.66	358179	80.62	0	0.09332
High	Sequest HT (A2)	Unambiguous	1	f2.2413	f2.2413	0.4535	-0.55	-0.00044	CID (Collision Induced Dissociation)	MS2	81.9969	9723	DG009795_Gallo_32.raw	0/0		2.69	2.78641e+06	82.05	0	0.002907
High	Sequest HT (A2)	Unambiguous	1	f2.2413	f2.2413	0.3497	2.62	0.00207	CID (Collision Induced Dissociation)	MS2	79.5928	9183	DG009795_Gallo_32.raw	0/0		2.86	884525	79.76	0.003364	0.1356
High	Sequest HT (A2)	Unambiguous	1	f2.2413	f2.2413	0.25	-0.58	-0.00043	CID (Collision Induced Dissociation)	MS2	80.4307	9521	DG009795_Gallo_32.raw	0/0		1.88	213782	80.55	0.005932	0.1673
Confidence	Identifying Node	PSM Ambiguity	# Proteins	Master Protein Accessions	Protein Accessions	DeltaScore	DeltaM [ppm]	Deltam/z [Da]	Activation Type	MS Order	RT [min]	First Scan	Spectrum File	Ions Matched	Annotation	XCorr	Area	Apex RT [min]	Percolator q-Value	Percolator PEP
High	Sequest HT (A2)	Unambiguous	1	r3.23615	r3.23615	0.0913	0.67	0.00028	HCD (High Energy Collision Dissociation)	MS2	45.1969	4783	DG009790_Gallo_30.raw	0/0		2.41	5.39773e+06	45.29	0.003364	0.1532

## Sheet: Fig.2H
	1	2	3	4	5	6	7	8	9	10	11	12
A	0.3731	0.2299	0.1157	0.1014	0.1074	0.1096	0.1128	0.0983	0.1207	0.1154	0.1217	0.1557
B	0.5427	0.5424	0.5652	0.527	0.4231	0.3132	0.2175	0.1655	0.1256	0.124	0.1326	0.1455
C	0.5009	0.405	0.1868	0.1324	0.1197	0.1234	0.1203	0.1043	0.1241	0.1252	0.12	0.151
D	0.5335	0.476	0.3381	0.2195	0.186	0.184	0.1406	0.1416	0.1351	0.1298	0.1361	0.0398	blank
E	0.4405	0.4541	0.474	0.5183	0.5374	0.4746	0.3689	0.2184	0.1581	0.1412	0.1332	0.5207
F	0.2894	0.146	0.1152	0.1216	0.1183	0.1214	0.1226	0.117	0.1294	0.1257	0.1287	0.4701
G	0.346	0.4188	0.3968	0.2887	0.2287	0.2078	0.1812	0.1541	0.1418	0.134	0.1212	0.504
H	0.6238	0.2615	0.171	0.1589	0.1545	0.1654	0.167	0.1778	0.196	0.1704	0.1815	0.6087
	1	2	3	4	5	6	7	8	9	10	11	12
A	0.3333	0.1901	0.0759	0.0616	0.0676	0.0698	0.073	0.0585	0.0809	0.0756	0.0819	0.1159		Spontaneous LDH release
B	0.5029	0.5026	0.5254	0.4872	0.3833	0.2734	0.1777	0.1257	0.0858	0.0842	0.0928	0.1057		0.110933
C	0.4611	0.3652	0.147	0.0926	0.0799	0.0836	0.0805	0.0645	0.0843	0.0854	0.0802	0.1112
D	0.4937	0.4362	0.2983	0.1797	0.1462	0.1442	0.1008	0.1018	0.0953	0.09	0.0963	0		Max LDH release
E	0.4007	0.4143	0.4342	0.4785	0.4976	0.4348	0.3291	0.1786	0.1183	0.1014	0.0934	0.4809		0.486075
F	0.2496	0.1062	0.0754	0.0818	0.0785	0.0816	0.0828	0.0772	0.0896	0.0859	0.0889	0.4303
G	0.3062	0.379	0.357	0.2489	0.1889	0.168	0.1414	0.1143	0.102	0.0942	0.0814	0.4642		Max LDH release- spont release
H	0.584	0.2217	0.1312	0.1191	0.1147	0.1256	0.1272	0.138	0.1562	0.1306	0.1417	0.5689		0.375142
	1	2	3	4	5	6	7	8	9	10	11
A	0.222367	0.0791667	-0.0350333	-0.0493333	-0.0433333	-0.0411333	-0.0379333	-0.0524333	-0.0300333	-0.0353333	-0.0290333
B	0.391967	0.391667	0.414467	0.376267	0.272367	0.162467	0.0667667	0.0147667	-0.0251333	-0.0267333	-0.0181333
C	0.350167	0.254267	0.0360667	-0.0183333	-0.0310333	-0.0273333	-0.0304333	-0.0464333	-0.0266333	-0.0255333	-0.0307333
D	0.382767	0.325267	0.187367	0.0687667	0.0352667	0.0332667	-0.0101333	-0.00913333	-0.0156333	-0.0209333	-0.0146333
E	0.289767	0.303367	0.323267	0.367567	0.386667	0.323867	0.218167	0.0676667	0.00736667	-0.00953333	-0.0175333
F	0.138667	-0.00473333	-0.0355333	-0.0291333	-0.0324333	-0.0293333	-0.0281333	-0.0337333	-0.0213333	-0.0250333	-0.0220333
G	0.195267	0.268067	0.246067	0.137967	0.0779667	0.0570667	0.0304667	0.00336667	-0.00893333	-0.0167333	-0.0295333
H	0.473067	0.110767	0.0202667	0.00816667	0.00376667	0.0146667	0.0162667	0.0270667	0.0452667	0.0196667	0.0307667
	1	2	3	4	5	6	7	8	9	10	11
A	0.592754	0.211031	-0.0933869	-0.131506	-0.115512	-0.109647	-0.101117	-0.139769	-0.0800586	-0.0941866	-0.077393
B	1.04485	1.04405	1.10483	1.003	0.726037	0.433081	0.177977	0.0393629	-0.0669969	-0.071262	-0.0483373
C	0.933425	0.677788	0.0961415	-0.0488704	-0.0827243	-0.0728614	-0.0811249	-0.123775	-0.0709954	-0.0680632	-0.0819246
D	1.02033	0.86705	0.499456	0.183309	0.0940089	0.0886776	-0.027012	-0.0243464	-0.0416731	-0.0558011	-0.0390075
E	0.772419	0.808672	0.861719	0.979808	1.03072	0.863318	0.581558	0.180376	0.019637	-0.0254126	-0.0467379
F	0.369638	-0.0126175	-0.0947198	-0.0776596	-0.0864562	-0.0781927	-0.0749939	-0.0899216	-0.0568674	-0.0667303	-0.0587334
G	0.520514	0.714574	0.65593	0.367772	0.207833	0.15212	0.0812138	0.00897439	-0.0238132	-0.0446054	-0.0787258
H	1.26103	0.295266	0.054024	0.0217696	0.0100407	0.0390963	0.0433614	0.0721505	0.120666	0.0524246	0.0820135
	0	1.95312	3.90625	7.8125	15.625	31.25	62.5	125	250	500	1000
PSMB1	0	0	0	0	0	8.86776	9.40089	18.3309	49.9456	86.705	102.033
PSMa	0	0	0	3.93629	17.7977	43.3081	72.6037	100.3	110.483	104.405	104.485
PSMB2	0	0	0	0	0	0	0	0	9.61415	67.7788	93.3425
Extract	0	0	0	0.897439	8.12138	15.212	20.7833	36.7772	65.593	71.4574	52.0514
PSMB3	0	0	0	0	4.33614	3.90963	1.00407	2.17696	5.4024	29.5266	126.103
EFHand	0	0	0	0	0	0	0	0	0	21.1031	59.2754
PSMg	0	0	1.9637	18.0376	58.1558	86.3318	103.072	97.9808	86.1719	80.8672	77.2419
DMSO	0	0	0	0	0	0	0	0	0	-1.26175	36.9638
