# Supplementary material for: Antimicrobials from a feline commensal bacterium inhibit skin infection by drug-resistant S. pseudintermedius
Source: eLife. 2021 Oct 19;10:e66793. doi: 10.7554/eLife.66793 (PMC8592530; doi:10.7554/eLife.66793)
Supplement: Figure 3—source data 1. [file elife-66793-fig3-data1.xlsx]

## Sheet: Fig.3A-C
IL6	AVE dCT	STDEV	SEM		hBD2	AVE dCT	STDEV	SEM		CXCL10	AVE dCT	STDEV	SEM
DMSO	0.00749115	0.00772116	0.00545968		DMSO	0.00034259	9.78778e-05	6.921e-05		DMSO	0.00148844	0.000346813	0.000245234
PSMB2	0.019489	0.00161121	0.0011393		PSMB2	0.000176927	0.000162703	0.000115048		PSMB2	0.00104709	9.95992e-05	7.04272e-05
PSMB3	0.0250191	0.00494328	0.00349543		PSMB3	0.00048156	3.0709e-05	2.17145e-05		PSMB3	0.00209493	0.000388059	0.000274399
Extract	0.0349634	0.0116888	0.00826526		Extract	6.70994e-05	1.13122e-05	7.99891e-06		Extract	0.00110335	7.43846e-05	5.25978e-05
MALP-2	0.0374953	0.00293362	0.00207438		MALP-2	0.0230536	0.000650616	0.000460055		MALP-2	0.00752269	0.000164689	0.000116453
M2 PSMB2	0.0237502	0.0113159	0.00800158		M2 PSMB2	0.00703725	0.00078102	0.000552264		M2 PSMB2	0.00240669	0.000760576	0.000537809
M2 PSMB3	0.0343143	0.0192502	0.0136119		M2 PSMB3	0.00938579	0.00435296	0.00307801		M2 PSMB3	0.00666301	0.00229595	0.00162348
M2 extract	0.0356761	0.0294276	0.0208085		M2 extract	0.00444745	0.000799897	0.000565613		M2 extract	0.00316153	0.00100355	0.000709614
PIC	0.076637	0.00220865	0.00156175		PIC	0.00162121	0.000181385	0.000128258		PIC	1.76626	0.270803	0.191486
PIC PSMB2	0.00534664	6.56995e-05	4.64566e-05		PIC PSMB2	0.000396659	0.000162249	0.000114727		PIC PSMB2	0.796453	0.197159	0.139412
PIC PSMB3	0.0119392	0.00912587	0.00645297		PIC PSMB3	0.000771581	0.000716088	0.000506351		PIC PSMB3	2.81819	1.90674	1.34827
PIC extract	0.0412586	0.01756	0.0124168		PIC extract	0.00145058	0.000377882	0.000267203		PIC extract	0.092094	0.0167511	0.0118448

## Sheet: Fig.3D
CXCL10	DMSO			PSMB2			PSMB3			Extract
STNDRD	0.4061	0.3405	0.1565	0.0747	0.0515	0.0659	0.0639	0.0586	0.0555	0.1588	0.1526	0.0907
STNDRD	0.6382	0.5334	0.4014	0.081	0.0796	0.072	0.0566	0.0498	0.0592	0.1485	0.0677	0.0874
MALP2	0.0556	0.0592	0.0934	0.0852	0.1034	0.1177	0.1254	0.0606	0.0744	0.0973	0.1226	0.0748
MALP2	0.0602	0.0867	0.0748	0.0921	0.056	0.0645	0.0507	0.0456	0.0794	0.0724	0.072	0.0514
PIC	0.066	0.0987	0.1133	0.1047	0.0864	0.0661	0.0566	0.0474	0.0646	0.0654	0.0551	0.0499
PIC	2.2029	2.315	2.6475	0.7357	0.5597	0.636	2.3219	2.3151	2.5594	2.1346	2.0774	1.8172
Blank	0.0416	0.0379	0.0363	0.0361	0.0334	0.0359	0.0348	0.0308	0.0327	0.031	0.0306	0.0334
H	0.000	0.000	0.000	0.000	0.000	0.000	0.000	0.000	0.000	0.000	0.000	0.000
CXCL10	DMSO			PSMB2			PSMB4			Extract
MALP2	0.0256	0.0292	0.0634	0.0552	0.0734	0.0877	0.0954	0.0306	0.0444	0.0673	0.0926	0.0448
MALP2	0.0302	0.0567	0.0448	0.0621	0.026	0.0345	0.0207	0.0156	0.0494	0.0424	0.042	0.0214
PIC	0.036	0.0687	0.0833	0.0747	0.0564	0.0361	0.0266	0.0174	0.0346	0.0354	0.0251	0.0199
PIC	2.1729	2.285	2.6175	0.7057	0.5297	0.606	2.2919	2.2851	2.5294	2.1046	2.0474	1.7872
CXCL10	DMSO			PSMB2			PSMB4			Extract
MALP2	1.16842	1.54737	5.14737	4.28421	6.2	7.70526	8.51579	1.69474	3.14737	5.55789	8.22105	3.18947
MALP2	1.65263	4.44211	3.18947	5.01053	1.21053	2.10526	0.652632	0.115789	3.67368	2.93684	2.89474	0.726316
PIC	2.26316	5.70526	7.24211	6.33684	4.41053	2.27368	1.27368	0.305263	2.11579	2.2	1.11579	0.568421
PIC	227.2	239	274	72.7579	54.2316	62.2632	239.726	239.011	264.726	220.011	213.989	186.6
CXCL10	DMSO			PSMB2			PSMB3			Extract
MALP2	23.3684	30.9474	102.947	85.6842	124	154.105	170.316	33.8947	62.9474	111.158	164.421	63.7895
	MALP-2			M-2 + PSMB2			M-2 + PSMB3			M-2 + Extract
MALP2	33.0526	88.8421	63.7895	100.211	24.2105	42.1053	13.0526	2.31579	73.4737	58.7368	57.8947	14.5263
	DMSO			PSMB2			PSMB3			Extract
PIC	45.2632	114.105	144.842	126.737	88.2105	45.4737	25.4737	6.10526	42.3158	44	22.3158	11.3684
	Poly I:C			PI:C + PSMB2			PI:C + PSMB3			PI:C + Extract
PIC	4544	4780	5480	1455.16	1084.63	1245.26	4794.53	4780.21	5294.53	4400.21	4279.79	3732
CXCL10
MALP2	DMSO	PSMB2	PSMB4	Extract	MALP-2	M-2 + PSMB2	M-2 + PSMB4	M-2 + Extract
AVE	52.4211	121.263	89.0526	113.123	61.8947	55.5088	29.614	43.7193
SEM	25.3577	19.7988	41.4881	29.0664	16.1329	22.9401	22.1478	14.5985
PIC	DMSO	PSMB2	PSMB4	Extract	MALP-2	M-2 + PSMB2	M-2 + PSMB4	M-2 + Extract	Poly I:C	PI:C + PSMB2	PI:C + PSMB4	PI:C + Extract
AVE	101.404	86.807	24.6316	25.8947	61.8947	55.5088	29.614	43.7193	4934.67	1261.68	4956.42	4137.33
SEM	29.4392	23.4691	10.4616	9.58839	16.1329	22.9401	22.1478	14.5985	281.049	107.276	169.103	205.626

## Sheet: Gene list Fig.3F
Gene symbol	P-value (POLYIC + PSMB*4 h vs. POLYIC*4 h)	Fold change (POLYIC + PSMB*4 h vs. POLYIC*4 h)
IFIT2	6.53863e-27	-4.75795
IFIT3	4.76029e-15	-5.16021
IFIT1	5.73353e-10	-6.17828
AL139819.1	6.23583e-10	-2.68662
IFIT3	1.31775e-08	-4.84475
ZC3HAV1	3.76853e-07	-2.19036
ISG15	0.000447164	-2.91846
PMAIP1	0.000901687	-1.66046
TUBB6	0.00139604	-1.72828
DDX58	0.00198138	-2.71569
CFL1	0.00407433	-1.81068
WDR1	0.00486803	-1.5789
ZNFX1	0.0050329	-1.72859
HCAR2	0.0066538	-2.54289
FSCN1	0.00706816	-1.73519
DDX5	0.00893868	-2.48064
HLA-A	0.00893999	-2.58528
TPM3	0.00977343	-2.61032
SLC25A1	0.0212292	-10.0362
RPL35	0.0231694	-2.24903
PTMS	0.0255493	-1.92924
DDX58	0.0273945	-6.93997
IRF1	0.0288487	-3.07883
GNAS	0.0288863	-1.7628
SHC1	0.0306042	-4.3563
HELZ2	0.0316826	-1.80804
PLAUR	0.0342855	-2.49004
OAS2	0.0363711	-2.9911
RPL14P1	0.0403215	-4.18079
SEPT9	0.0429253	-1.65488
CCRN4L	0.0435754	-1.79846
HCAR3	0.0480742	-2.10571

## Sheet: Fig.3H
Concentration	200	100	50	25	12.5	6.25	3.125	1.5625	0.78125	0			Concentration	200	100	50	25	12.5	6.25	3.125	1.5625	0.78125	0
PSMB1	0.0519	0.0676	0.1513	0.2172	0.3773	0.3915	0.4244	0.4186	0.3988	0.5098			Extract	0.0586	0.054	0.0558	0.0507	0.0575	0.0526	0.051	0.0564	0.422	0.447
PSMB1	0.0448	0.0692	0.1557	0.2403	0.3698	0.416	0.4456	0.436	0.4187	0.4734			Extract	0.0452	0.0435	0.0429	0.0454	0.0438	0.0415	0.0426	0.0429	0.4113	0.4091
PSMB2-F	0.0464	0.0489	0.0736	0.1603	0.3935	0.4709	0.476	0.4478	0.4052	0.4394			PSMB3	0.0483	0.0465	0.1085	0.3717	0.5123	0.5228	0.5177	0.4832	0.43	0.436
PSMB2-F	0.0459	0.0434	0.0521	0.1003	0.3775	0.4535	0.464	0.4283	0.3723	0.4305			PSMB3	0.0461	0.043	0.0634	0.3922	0.4801	0.4946	0.4764	0.4628	0.3985	0.4164
PSMB2+F	0.0415	0.0567	0.1156	0.2688	0.3645	0.3762	0.3906	0.3351	0.4668	0.5044			EFHAND	0.0858	0.4366	0.4935	0.5547	0.5719	0.564	0.5698	0.5652	0.5524	0.5506
PSMB2+F	0.0429	0.0544	0.1243	0.282	0.4008	0.3529	0.3555	0.3623	0.4342	0.5092			EFHAND	0.0724	0.4521	0.497	0.5438	0.558	0.5433	0.5454	0.5446	0.5123	0.5775
DMSO	0.044	0.2762	0.5384	0.5482	0.6109	0.6491	0.6032	0.5492	0.5311	0.571			DMSO		0.5839	0.5833	0.6317	0.6234	0.6016	0.5874	0.607	0.5782	0.6126
	200	100	50	25	12.5	6.25	3.125	1.5625	0.78125	0				200	100	50	25	12.5	6.25	3.125	1.5625	0.78125	0
PSMB1	0.0079	0.0236	0.1073	0.1732	0.3333	0.3475	0.3804	0.3746	0.3548	0.4658			Extract	0.0146	0.01	0.0118	0.0067	0.0135	0.0086	0.007	0.0124	0.378	0.403
PSMB1	0.0008	0.0252	0.1117	0.1963	0.3258	0.372	0.4016	0.392	0.3747	0.4294			Extract	0.0012	-0.0005	-0.0011	0.0014	-0.0002	-0.0025	-0.0014	-0.0011	0.3673	0.3651
PSMB2-F	0.0024	0.0049	0.0296	0.1163	0.3495	0.4269	0.432	0.4038	0.3612	0.3954			PSMB3	0.0043	0.0025	0.0645	0.3277	0.4683	0.4788	0.4737	0.4392	0.386	0.392
PSMB2-F	0.0019	-0.0006	0.0081	0.0563	0.3335	0.4095	0.42	0.3843	0.3283	0.3865			PSMB3	0.0021	-0.001	0.0194	0.3482	0.4361	0.4506	0.4324	0.4188	0.3545	0.3724
PSMB2+F	-0.0025	0.0127	0.0716	0.2248	0.3205	0.3322	0.3466	0.2911	0.4228	0.4604			EFHAND	0.0418	0.3926	0.4495	0.5107	0.5279	0.52	0.5258	0.5212	0.5084	0.5066
PSMB2+F	-0.0011	0.0104	0.0803	0.238	0.3568	0.3089	0.3115	0.3183	0.3902	0.4652			EFHAND	0.0284	0.4081	0.453	0.4998	0.514	0.4993	0.5014	0.5006	0.4683	0.5335
DMSO	0	0.2322	0.4944	0.5042	0.5669	0.6051	0.5592	0.5052	0.4871	0.527			DMSO		0.5399	0.5393	0.5877	0.5794	0.5576	0.5434	0.563	0.5342	0.5686
	200	100	50	25	12.5	6.25	3.125	1.5625	0.78125	0				200	100	50	25	12.5	6.25	3.125	1.5625	0.78125	0
PSMB1	0.474	1.416	6.438	10.392	19.998	20.85	22.824	22.476	21.288	27.948			Extract	0.876	0.6	0.708	0.402	0.81	0.516	0.42	0.744	22.68	24.18
PSMB1	0.048	1.512	6.702	11.778	19.548	22.32	24.096	23.52	22.482	25.764			Extract	0.072	-0.03	-0.066	0.084	-0.012	-0.15	-0.084	-0.066	22.038	21.906
PSMB2-F	0.144	0.294	1.776	6.978	20.97	25.614	25.92	24.228	21.672	23.724			PSMB3	0.258	0.15	3.87	19.662	28.098	28.728	28.422	26.352	23.16	23.52
PSMB2-F	0.114	-0.036	0.486	3.378	20.01	24.57	25.2	23.058	19.698	23.19			PSMB3	0.126	-0.06	1.164	20.892	26.166	27.036	25.944	25.128	21.27	22.344
PSMB2+F	-0.15	0.762	4.296	13.488	19.23	19.932	20.796	17.466	25.368	27.624			EFHAND	2.508	23.556	26.97	30.642	31.674	31.2	31.548	31.272	30.504	30.396
PSMB2+F	-0.066	0.624	4.818	14.28	21.408	18.534	18.69	19.098	23.412	27.912			EFHAND	1.704	24.486	27.18	29.988	30.84	29.958	30.084	30.036	28.098	32.01
DMSO	0	13.932	29.664	30.252	34.014	36.306	33.552	30.312	29.226	31.62			DMSO	0	32.394	32.358	35.262	34.764	33.456	32.604	33.78	32.052	34.116
AVE	0	0.8	1.6	3.1	6.2	12.5	25	50	100	200			AVE	0	0.78125	1.5625	3.125	6.25	12.5	25	50	100	200
PSMβ1	26.856	21.885	22.998	23.46	21.585	19.773	11.085	6.57	1.464	0.261			Extract	23.043	22.359	0.339	0.168	0.183	0.399	0.243	0.321	0.285	0.474
PSMβ2 (no N-f)	23.457	20.685	23.643	25.56	25.092	20.49	5.178	1.131	0.129	0.129			PSMB3	22.932	22.215	25.74	27.183	27.882	27.132	20.277	2.517	0.045	0.192
PSMβ2	27.768	24.39	18.282	19.743	19.233	20.319	13.884	4.557	0.693	-0.108			EFHAND	31.203	29.301	30.654	30.816	30.579	31.257	30.315	27.075	24.021	2.106
Extract	23.043	22.359	0.339	0.168	0.183	0.399	0.243	0.321	0.285	0.474
PSMβ3	22.932	22.215	25.74	27.183	27.882	27.132	20.277	2.517	0.045	0.192			SEM	0	0.78125	1.5625	3.125	6.25	12.5	25	50	100	200
Unknown (EFHAND)	31.203	29.301	30.654	30.816	30.579	31.257	30.315	27.075	24.021	2.106			Extract	1.137	0.321	0.405	0.252	0.333	0.411	0.159	0.387	0.315	0.402
													PSMB3	0.588	0.945	0.612	1.239	0.846	0.966	0.615	1.353	0.105	0.066
SEM	0	0.8	1.6	3.1	6.2	12.5	25	50	100	200			EFHAND	0.807	1.203	0.618	0.732	0.621	0.417	0.327	0.105	0.465	0.402
PSMB1	1.092	0.597	0.522	0.636	0.735	0.225	0.693	0.132	0.048	0.213
PSMB2-F	1.02	0.405	0.354	0.912	1.647	0.711	2.4	2.463	0.609	0.048
PSMB2+F	0.267	0.987	0.585	0.36	0.522	0.48	1.8	0.645	0.165	0.015
Extract	1.137	0.321	0.405	0.252	0.333	0.411	0.159	0.387	0.315	0.402
PSMB3	0.588	0.945	0.612	1.239	0.846	0.966	0.615	1.353	0.105	0.066
Unknown (EFHAND)	0.807	1.203	0.618	0.732	0.621	0.417	0.327	0.105	0.465	0.402
