# Supplementary material for: Antimicrobials from a feline commensal bacterium inhibit skin infection by drug-resistant S. pseudintermedius
Source: eLife. 2021 Oct 19;10:e66793. doi: 10.7554/eLife.66793 (PMC8592530; doi:10.7554/eLife.66793)
Supplement: Figure 5—source data 3. [file elife-66793-fig5-data3.xlsx]

## Sheet: Fig.5C,D
	ROS
	0	10	20	40	80	160	320
	0	1256	3827.75	3688.75	5777.75	11443.8	18400.8
	0	1533	1608.75	3521.75	3763.75	7464.75	19668.8
	0	988	1888.75	546.75	2474.75	8139.75	17388.8
	ATP
	0	1.25	10	40	80	160	320
	2040	1308	978	664	556	35	161
	2166	1458	899	599	541	68	90

## Sheet: Fig.5F
TSB/extract subMIC	Serial dilution of antibiotics
A	Rifampicin	0	0.000488281	0.000976562	0.00195312	0.00390625	0.0078125	0.015625	0.03125	0.0625	0.125	0.25	0.5	1
PenG	TSB	33.186	26.676	24.42	24.156	24.108	23.934	24.546	23.796	24.024	0.69	0.324	0.318	0.654
Rifampin	TSB/Extract (subMIC)	32.1655	28.356	25.692	24.648	25.026	25.176	24.888	15.474	0.246	0.348	0.222	0.372	0.744
Cloramphenicol	Cloramphenicol	0	0.000488281	0.000976562	0.00195312	0.00390625	0.0078125	0.015625	0.03125	0.0625	0.125	0.25	0.5	1
Gentamicin	TSB	33.186	27.06	25.086	24.162	24.378	10.176	0.39	0.768	0.648	0.708	0.54	0.42	1.008
Tetracycline	TSB/Extract (subMIC)	32.1655	29.172	25.428	21.9	0.87	0.366	0.324	0.606	0.288	0.678	0.336	0.45	1.044
Erythromycin	Gentamicin	0	0.000488281	0.000976562	0.00195312	0.00390625	0.0078125	0.015625	0.03125	0.0625	0.125	0.25	0.5	1
H	TSB	33.186	26.22	25.074	23.934	24.156	23.346	23.67	23.226	0.606	0.246	0.114	0.252	0.402
	TSB/Extract (subMIC)	32.1655	28.998	26.484	25.062	25.032	21.528	0.324	0.198	0.084	0.072	0.054	0.264	0.57
	Erythromycin	0	0.000488281	0.000976562	0.00195312	0.00390625	0.0078125	0.015625	0.03125	0.0625	0.125	0.25	0.5	1
A	TSB	33.186	34.188	28.38	27.486	27.228	26.496	26.376	25.002	25.398	24.726	19.908	21.66	23.412
PenG	TSB/Extract (subMIC)	32.1655	29.424	23.202	1.326	0.162	0.132	0.402	0.246	0	0	0	0.192	0.342
Rifampin
Cloramphenicol
Gentamicin
Tetracycline
Erythromycin
H
A
PenG
Rifampin
Cloramphenicol
Gentamicin
Tetracycline
Erythromycin
H
