# Supplementary material for: Antimicrobials from a feline commensal bacterium inhibit skin infection by drug-resistant S. pseudintermedius
Source: eLife. 2021 Oct 19;10:e66793. doi: 10.7554/eLife.66793 (PMC8592530; doi:10.7554/eLife.66793)
Supplement: Figure 6—source data 1. [file elife-66793-fig6-data1.xlsx]

## Sheet: Fig.6D,E
Control TSB			Butanol Extract				Live S. felis C4
500000000	101000000	1000000000	470000	620000	520000	900000	190000	150000	510000	130000
Control TSB			Butanol Extract				Live S. felis C4
250000000	47000000	357000000	630000	460000	380000	1230000	70000000	2100000	7000000	41000000

## Sheet: Fig.6G
	Day 1	Day 2	Day 3	Day 4	Day 5	Day 6	Day 7	Day 12
Extract M1	0	4	28	60	24	21	20	1															Day 12	1	2	1.5	2.5	2	35	30	15	9
Extract M2	0	0	24	16.5	18	16	15	2
Extract M3	0	0	49	35	24	18	17.5	1.5
Extract M4	0	15	49	42	42	26	20	2.5
Extract M5	0	0	18	18	28	20	12	2
Control M1	0	104	65	78	55	56	50	35
Control M2	0	0	16	187	117	85	66	30
Control M3	0	9	48	50	45	40	35	15
Control M4	0	50	84	128	75	65	55	9
AVERAGE	Day 1	Day 2	Day 3	Day 4	Day 5	Day 6	Day 7	Day 12
Control M1	0	40.75	53.25	110.75	73	61.5	51.5	22.25
Extract M1	0	3.8	33.6	34.3	27.2	20.2	16.9	1.8
STDEV	Day 1	Day 2	Day 3	Day 4	Day 5	Day 6	Day 7	Day 12
Control M1	0	2.90517	6.48537	8.07094	4.02989	1.68523	1.53623	0.254951
Extract M1	0	23.7254	14.4301	30.1036	15.9374	9.38527	6.43558	6.12883
